# Supplementary material for: Hub Gene Identification and Heat-Stress-Related Transcriptional Regulation Mechanism in Cabbage (Brassica oleracea L.)
Source: MDPI journal article supplement (doi:10.3390/horticulturae9090977), 2023-08-30
Supplement: s1 [file s1]

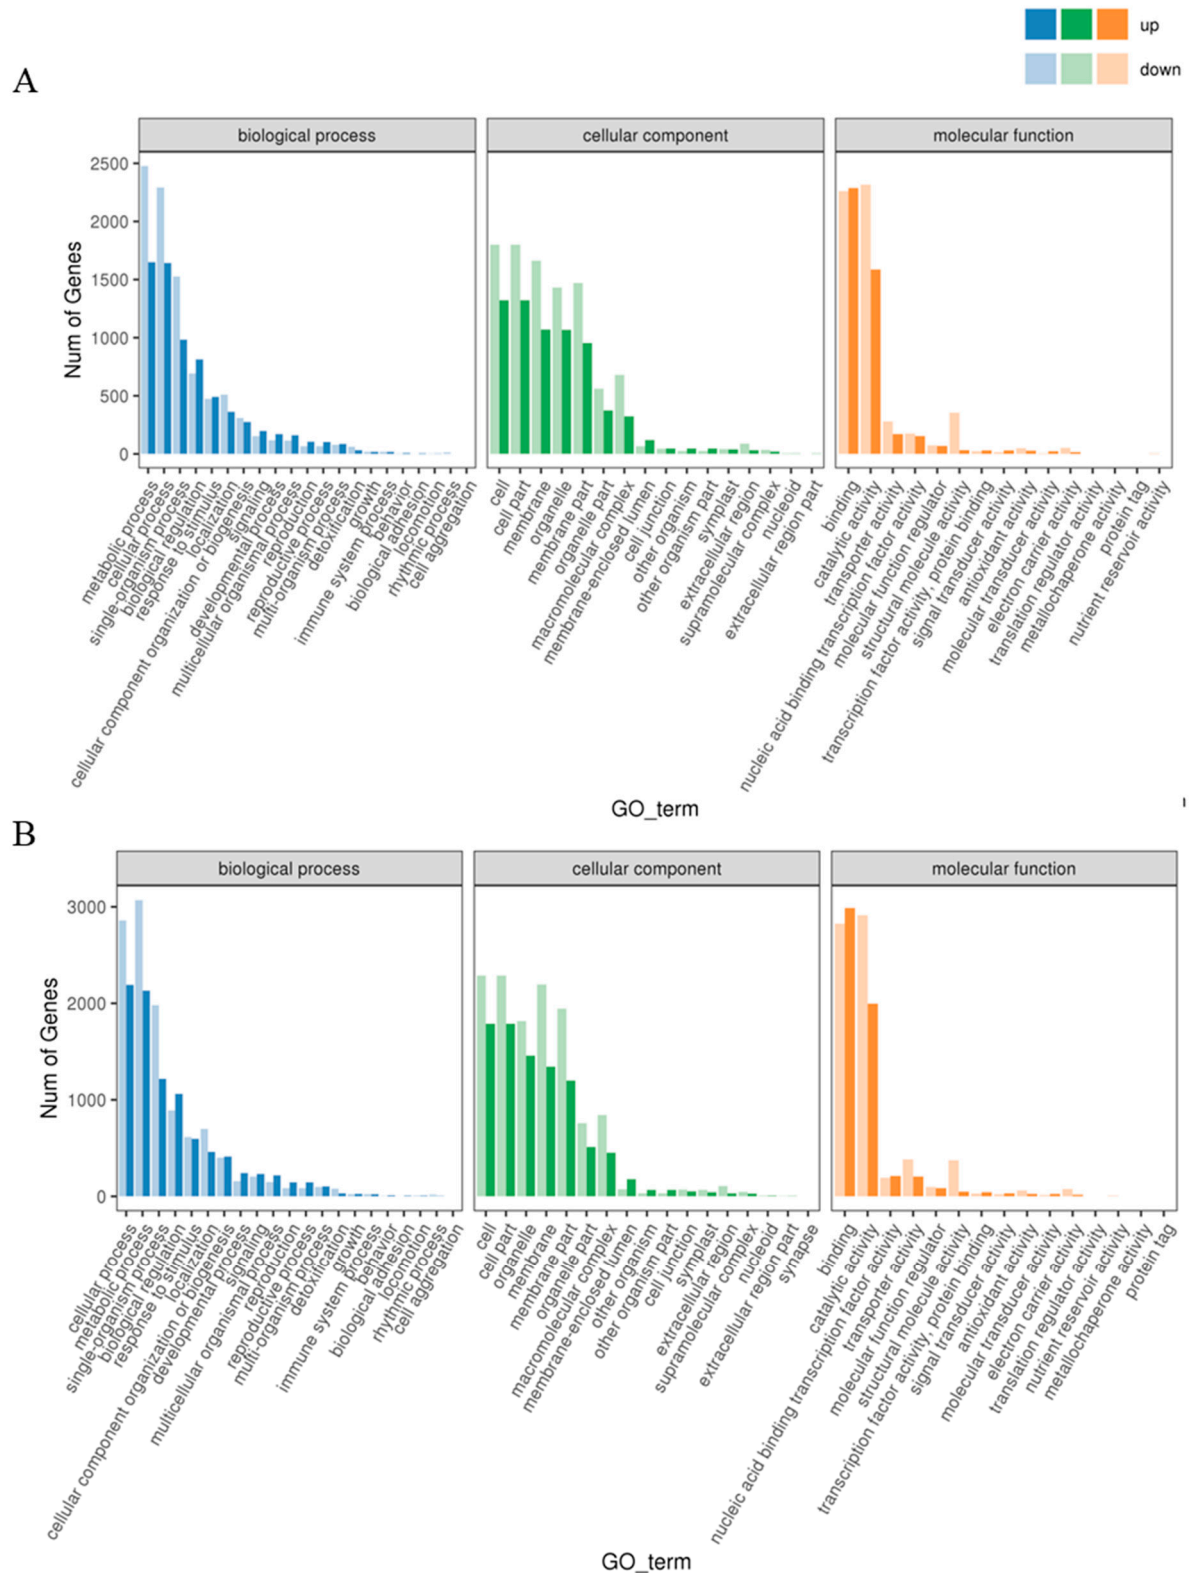

Figure S1. GO enrichment on DEGs. A. GO enrichment on DEGs in CK vs H4; B. GO enrichment on DEGs in CK vs H12.

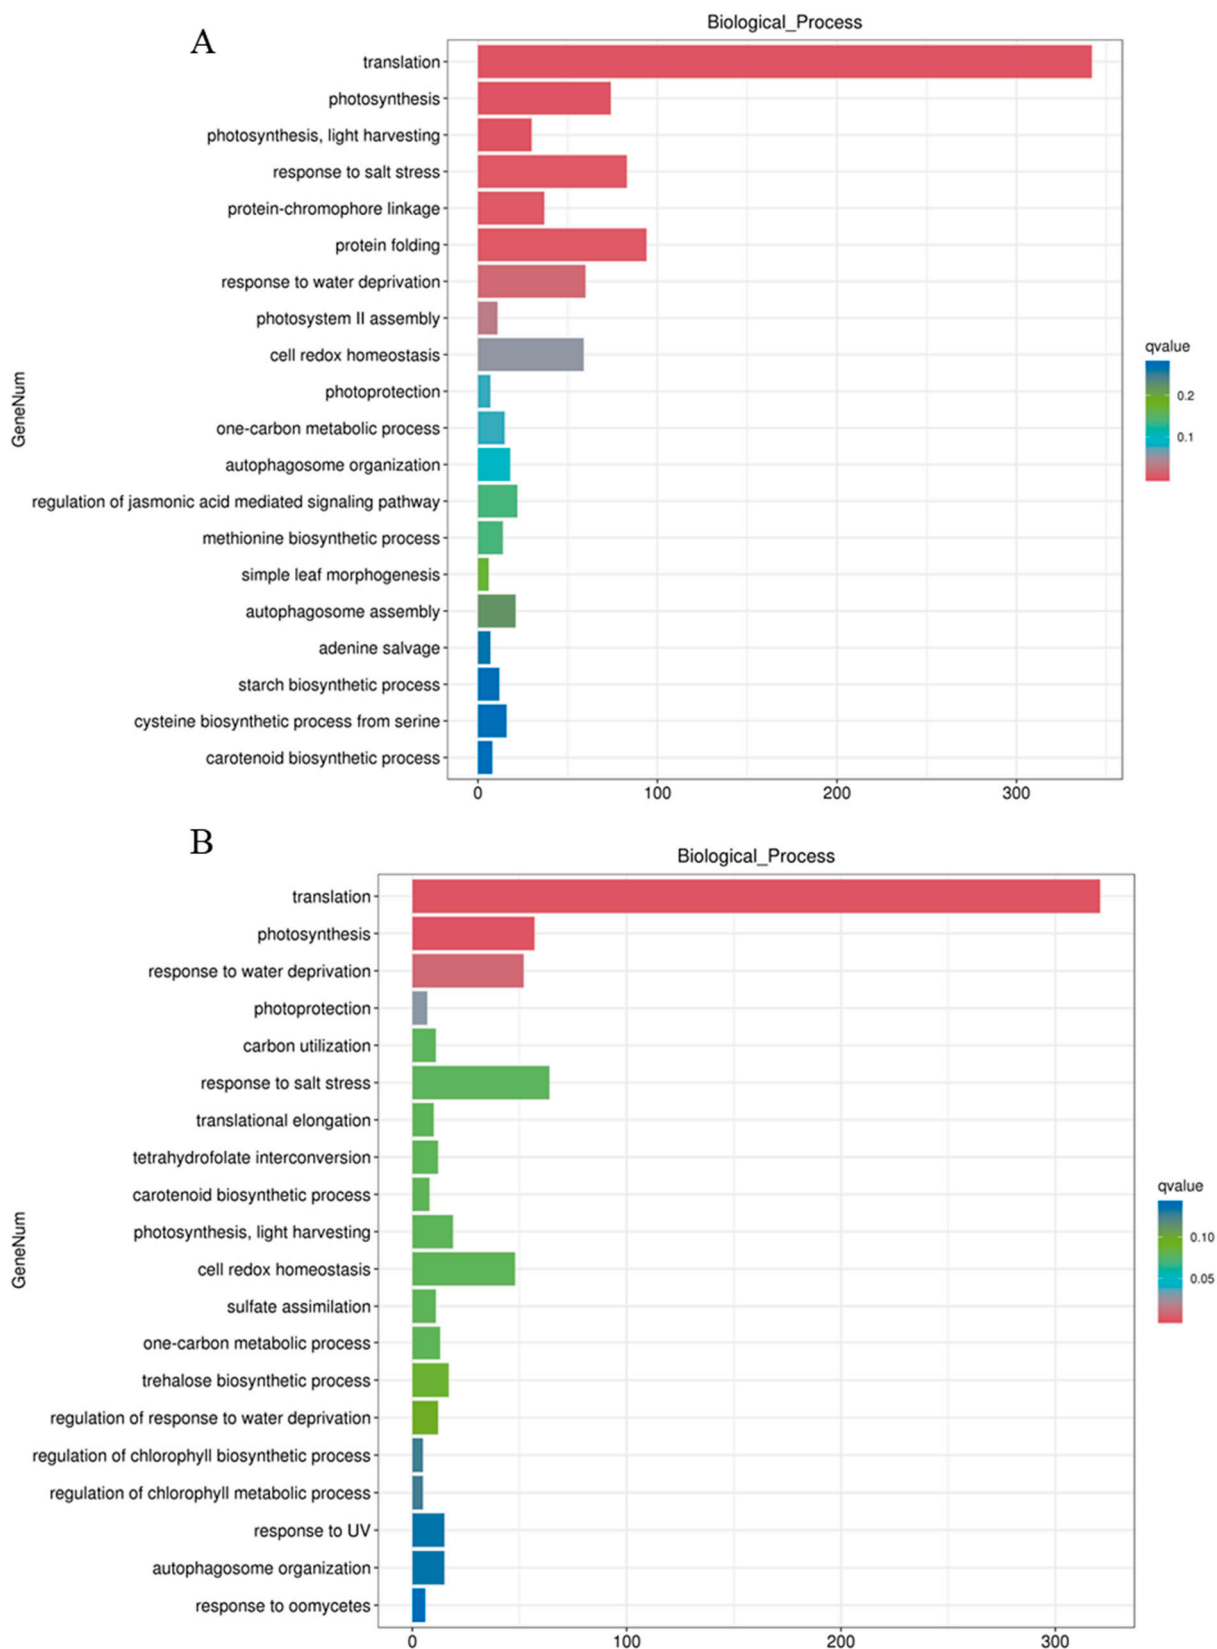

Figure S2. GO enrichment on DEGs in Biological Processes –Histogram. A. Histogram of the biological process GO enrichment of DEGs in CK vs H4; B. Histogram of the biological process GO enrichment of DEGs in CK vs H12.

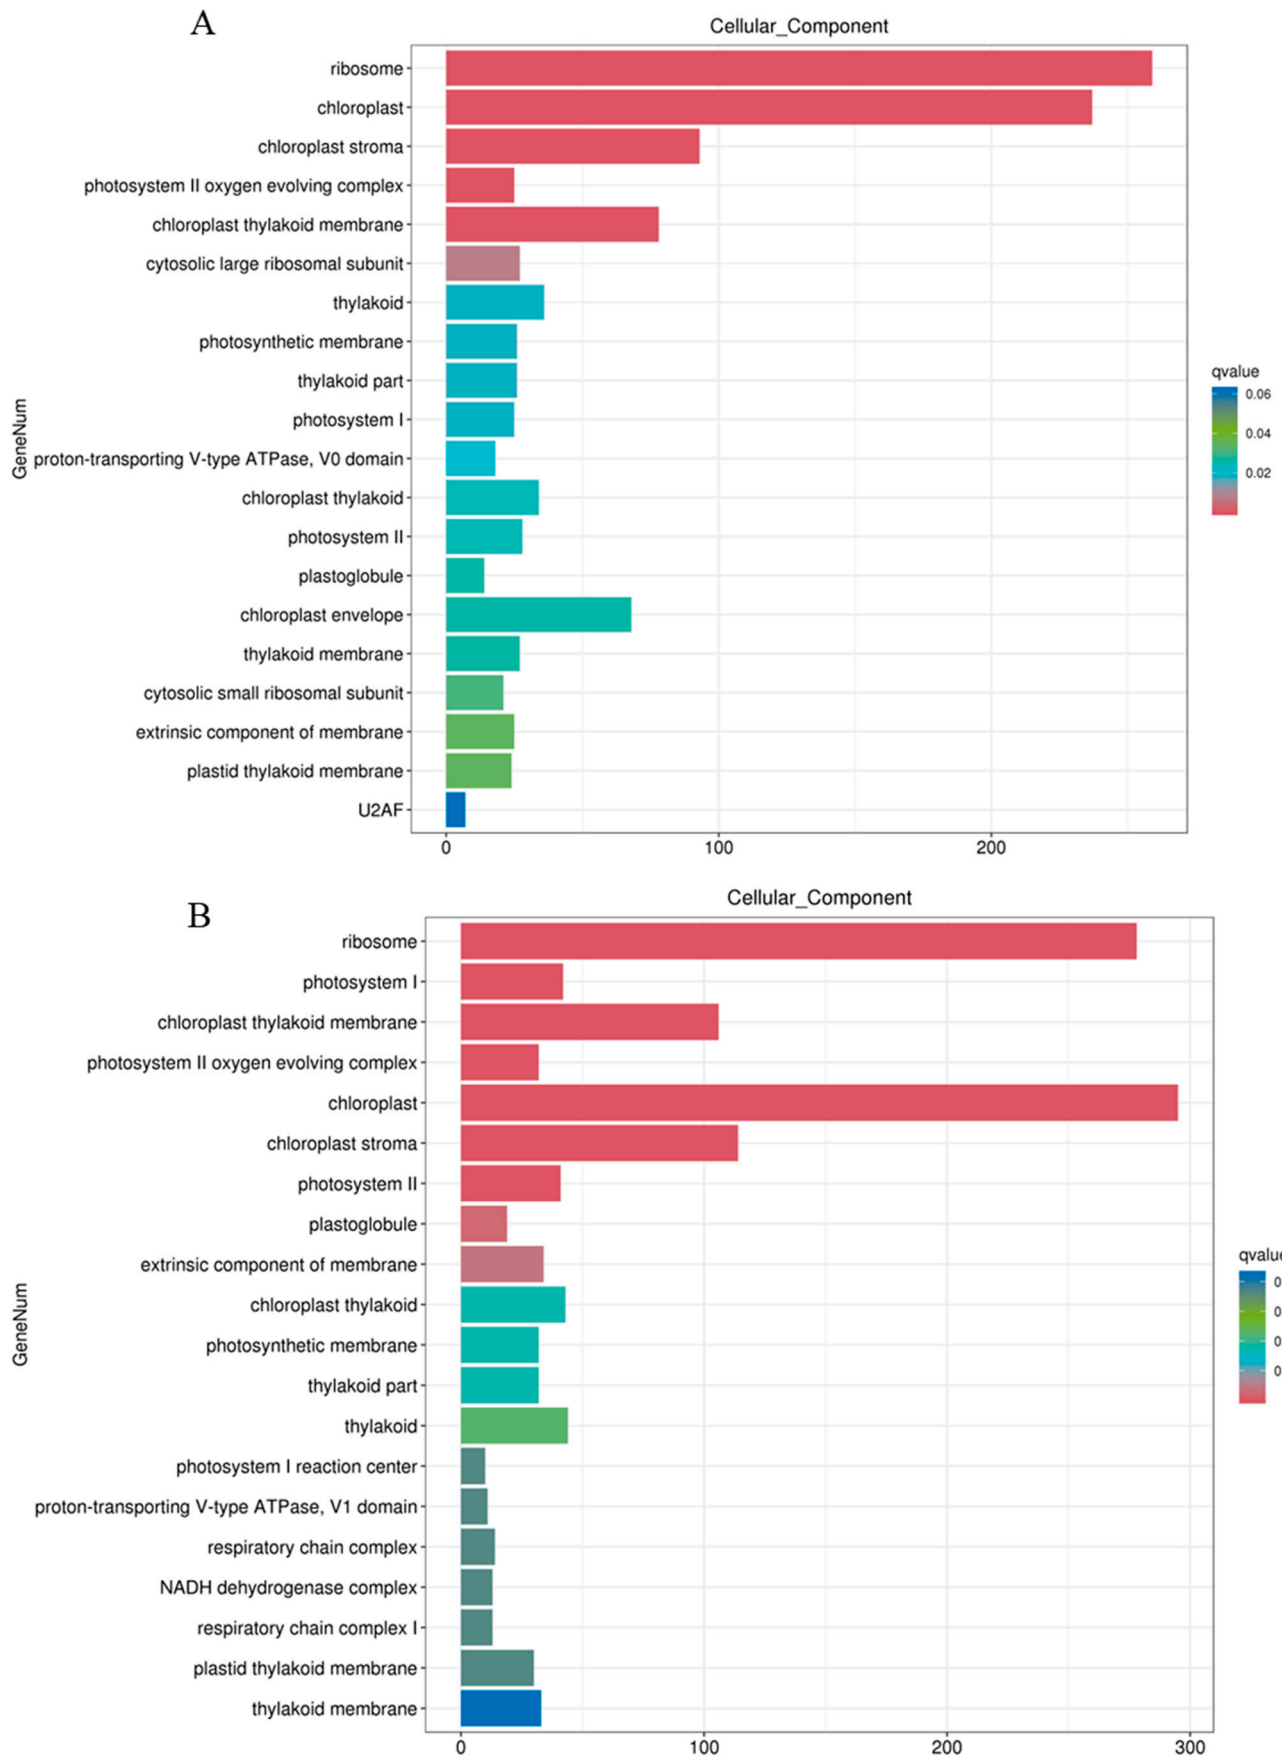

Figure S3. GO enrichment on DEGs in Cellular component –Histogram. A. Histogram of the Cellular component GO enrichment of DEGs in CK vs H4; B. Histogram of the Cellular component GO enrichment of DEGs in CK vs H12.

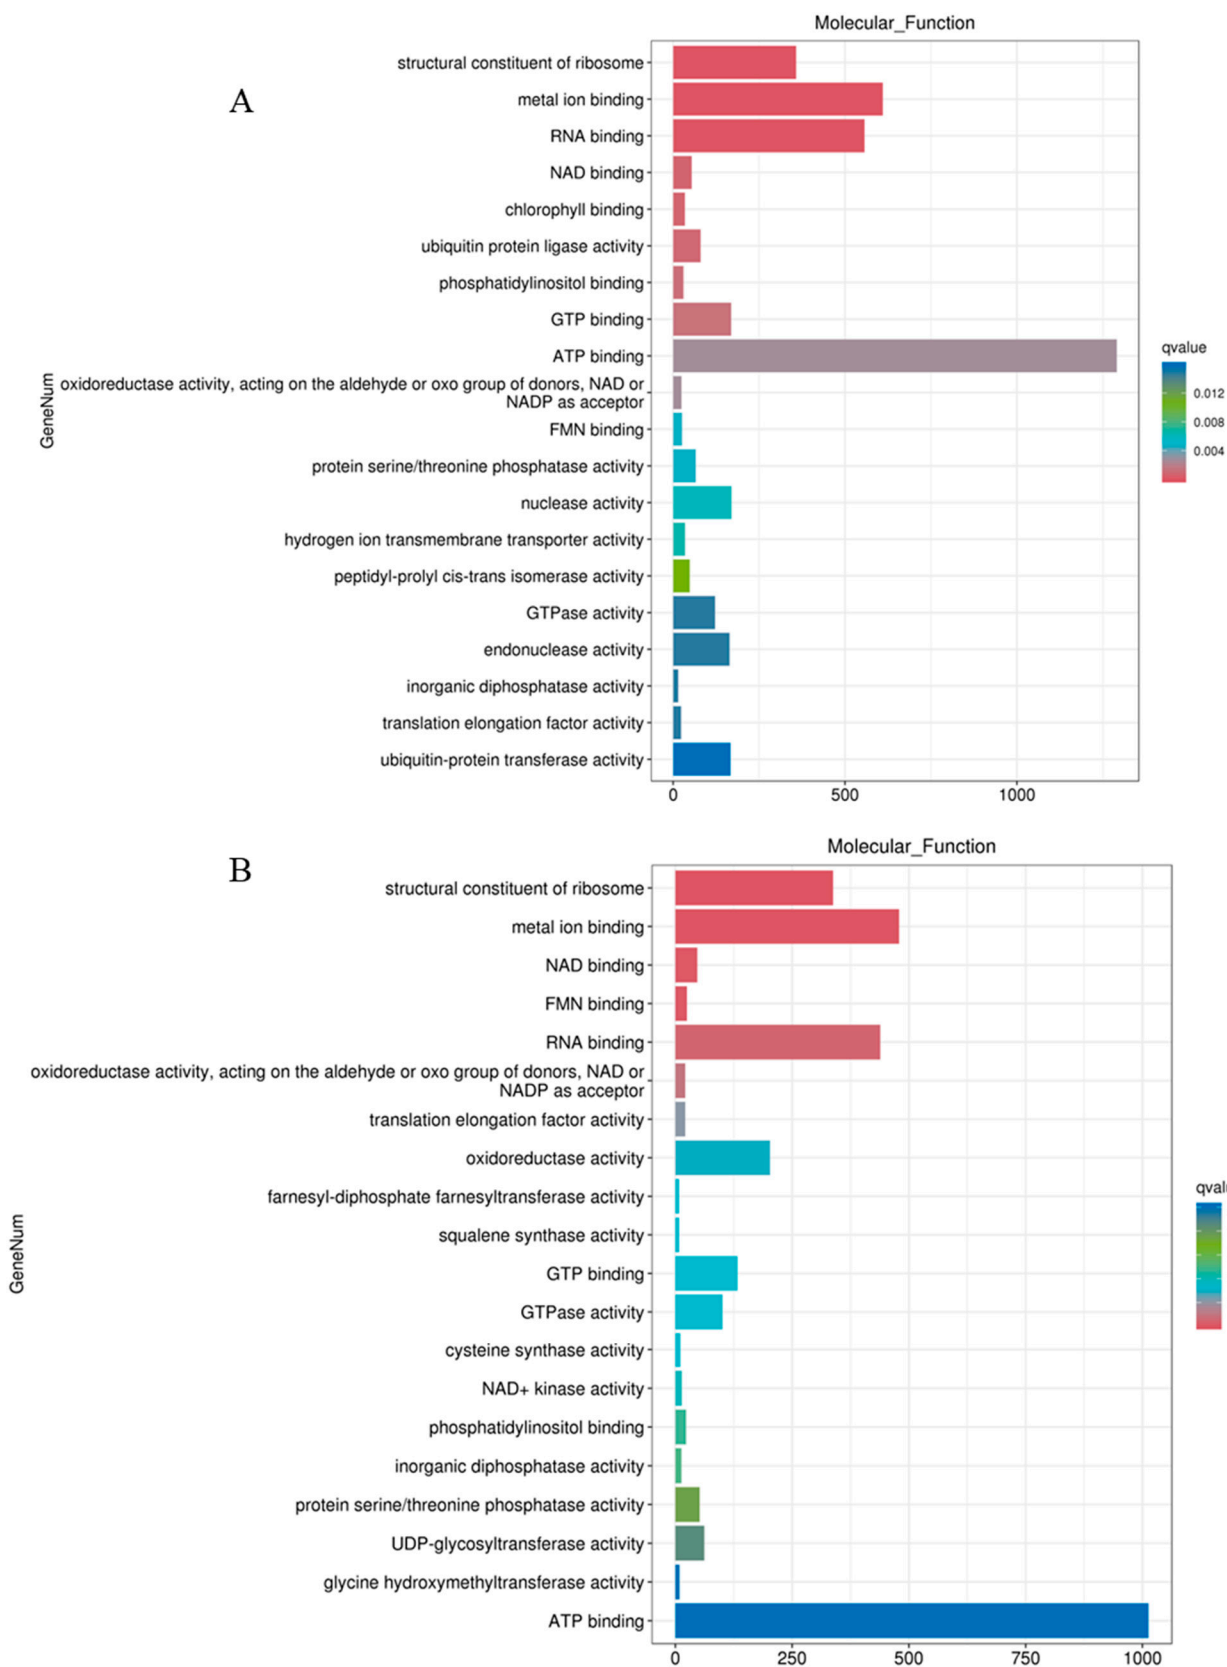

Figure S4. GO enrichment on DEGs in Molecular functions –Histogram. A. Histogram of the Molecular functions GO enrichment of DEGs in CK vs H4; B. Histogram of the Molecular functions GO enrichment of DEGs in CK vs H12.

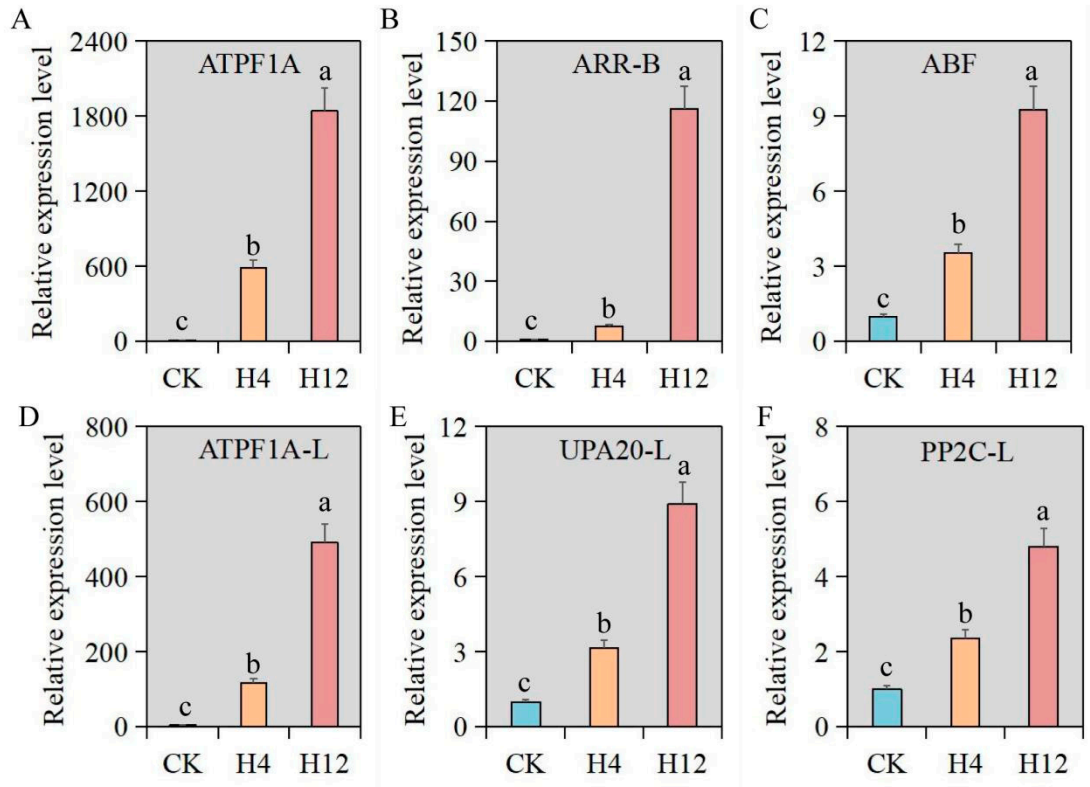

Figure S5. Expression patterns of hub genes under artificial high temperature treatment. CK represents the control group (without any treatment); H4 represents heat treatment at 35 °C for 4 h; H12 represents heat treatment at 35 °C for 12 h. Significant differences (a - c) over the bars indicate variations at a significance level of  $P < 0.05$ , determined through Tukey's multiple comparison test.
