# Supplementary material for: Hub Gene Identification and Heat-Stress-Related Transcriptional Regulation Mechanism in Cabbage (Brassica oleracea L.)
Source: MDPI journal article supplement (doi:10.3390/horticulturae9090977), 2023-08-30
Supplement: s1 [file s1]

Archive with 8 entries (8 files):
- Figure S.pdf
- Table S1.xlsx
- Table S2.xlsx
- Table S3.xlsx
- Table S4.xlsx
- Table S5.xlsx
- Table S6.xlsx
- Table S7.xlsx
