# Supplementary material for: Hub Gene Identification and Heat-Stress-Related Transcriptional Regulation Mechanism in Cabbage (Brassica oleracea L.)
Source: MDPI journal article supplement (doi:10.3390/horticulturae9090977), 2023-08-30
Supplement: s1 [file s1 › Table S1.xlsx]

## Sheet: Sheet1
Table S1. List of all primers involved in this study.
Gene name	Forward primer	Reverse primer
BolC06g005890.2J	AGAGAGAGAAACCGTATAAAGGGA	GGGTCGGGTAGTTTGTTTAAATCG
BolC04g003520.2J	TTCCACCACCTCCTCCTCAA	ACTTAGACCACTCGTCACGC
BolC08g044690.2J	TGCCCAACAGAGCGATTTTC	CGAGTCTCTGGGTCAAGGTC
BolC01g004240.2J	GCCTGAGTACTTCGAGGACG	TCACATACAACCGGCGGTTC
BolC02g046020.2J	ATCTCCTTGCTTCTTCCGGC	TGGGATACGTGCACTTGAAGT
BolC07g046110.2J	GCCGTACGGAATCCAATCGA	TGAATGCACGCATCAGCAAC
BolC06g005320.2J	CTAGCGTTGTCGTCGAGCTC	GGCATCTTCTCAACAACGCG
BolC01g051360.2J	ACGAACGGTGATTCTGACGT	CCAGCGAGAAGTCTCTGAGC
BolC07g057400.2J	GATCTCCAGAAGAAGCAGGAGG	CCTCACTCCACAACCTTGGTAT
BolC07g039220.2J	AGCACTCGTCAACACTGATGAT	TTCCGGAGAGTTCAAGTCGTTT
BolC03g066110.2J	CGTGGGGTGTGTTCTCTGATAA	TGCAGTCCACTCAAAGGAATCA
BolC01g051280.2J	AATGATGGTGGTCTCAAGCCAA	CCCTAGCAAGCTAGCATCTTGA
BolC05g024080.2J	TGTCCTATCCGAAGTTCTGCTG	AGCCTTCCTAACTCTTTTCGCA
Brassica_oleracea_newGene_2928	CGAGGGATTCATAAGAGGCCAA	AGCTACCGTGATTGTTGGAGAG
Brassica_oleracea_newGene_4238	GGCCGGGTTATTCTCATCCATA	TACTGAACCGCAAGATCCAACA
Actin	CCAGAGGTCTTGTTCCAGCCATC	GTTCCACCACTGAGCACAATGTTAC
