# Supplementary material for: Hub Gene Identification and Heat-Stress-Related Transcriptional Regulation Mechanism in Cabbage (Brassica oleracea L.)
Source: MDPI journal article supplement (doi:10.3390/horticulturae9090977), 2023-08-30
Supplement: s1 [file s1 › Table S2.xlsx]

## Sheet: Sheet1
Table S2. Sequencing data statistics.
Samples	Clean reads	Clean bases	GC Content	%≥Q30
CK1	21249568	6357839654	0.4787	0.9581
CK2	19498129	5834152618	0.4784	0.9602
CK3	19112644	5718324436	0.4746	0.9595
H12-1	21272001	6366596912	0.4655	0.9573
H12-2	22586153	6757047684	0.4666	0.9582
H12-3	20434855	6114910462	0.4662	0.9561
H4-1	23456029	7018448376	0.4702	0.9546
H4-2	21481372	6427136900	0.4721	0.9479
H4-3	20333047	6084293158	0.4651	0.9555
