# Supplementary material for: Hub Gene Identification and Heat-Stress-Related Transcriptional Regulation Mechanism in Cabbage (Brassica oleracea L.)
Source: MDPI journal article supplement (doi:10.3390/horticulturae9090977), 2023-08-30
Supplement: s1 [file s1 › Table S3.xlsx]

## Sheet: table S2
Table S3. Sequence alignment of sample sequencing data with selected reference genomes.
Sample	Total Reads	Mapped Reads	Uniq Mapped Reads	Multiple Map Reads	Reads Map to '+'	Reads Map to '-'
CK1	42499136	39,813,983 (93.68%)	38,056,182 (89.55%)	1,757,801 (4.14%)	21,723,926 (51.12%)	21,700,332 (51.06%)
CK2	38996258	36,825,851 (94.43%)	35,138,910 (90.11%)	1,686,941 (4.33%)	20,243,497 (51.91%)	20,188,243 (51.77%)
CK3	38225288	36,041,962 (94.29%)	34,468,492 (90.17%)	1,573,470 (4.12%)	19,478,212 (50.96%)	19,460,052 (50.91%)
H12-1	42544002	39,364,848 (92.53%)	37,375,740 (87.85%)	1,989,108 (4.68%)	21,824,121 (51.30%)	21,823,545 (51.30%)
H12-2	45172306	41,705,328 (92.32%)	39,728,416 (87.95%)	1,976,912 (4.38%)	22,886,639 (50.67%)	22,898,025 (50.69%)
H12-3	40869710	37,887,015 (92.70%)	36,106,367 (88.35%)	1,780,648 (4.36%)	20,756,105 (50.79%)	20,759,314 (50.79%)
H4-1	46912058	43,663,304 (93.07%)	39,983,207 (85.23%)	3,680,097 (7.84%)	27,115,143 (57.80%)	27,108,920 (57.79%)
H4-2	42962744	40,046,171 (93.21%)	38,084,094 (88.64%)	1,962,077 (4.57%)	22,191,155 (51.65%)	22,198,679 (51.67%)
H4-3	40666094	37,723,397 (92.76%)	35,567,325 (87.46%)	2,156,072 (5.30%)	21,363,770 (52.53%)	21,362,519 (52.53%)
L12-1	41072782	38,458,889 (93.64%)	36,874,203 (89.78%)	1,584,686 (3.86%)	20,804,810 (50.65%)	20,775,381 (50.58%)
L12-2	44019276	41,398,853 (94.05%)	39,639,021 (90.05%)	1,759,832 (4.00%)	22,474,269 (51.06%)	22,444,835 (50.99%)
L12-3	40341932	37,912,835 (93.98%)	36,285,182 (89.94%)	1,627,653 (4.03%)	20,589,728 (51.04%)	20,578,723 (51.01%)
L4-1	41377886	38,959,980 (94.16%)	37,255,746 (90.04%)	1,704,234 (4.12%)	21,234,478 (51.32%)	21,208,390 (51.26%)
L4-2	45104468	42,444,423 (94.10%)	40,477,548 (89.74%)	1,966,875 (4.36%)	23,259,352 (51.57%)	23,225,237 (51.49%)
L4-3	49290246	46,329,216 (93.99%)	44,378,915 (90.04%)	1,950,301 (3.96%)	25,031,586 (50.78%)	24,999,086 (50.72%)
