# Supplementary material for: Hub Gene Identification and Heat-Stress-Related Transcriptional Regulation Mechanism in Cabbage (Brassica oleracea L.)
Source: MDPI journal article supplement (doi:10.3390/horticulturae9090977), 2023-08-30
Supplement: s1 [file s1 › Table S4.xlsx]

## Sheet: Sheet1
Table S4. Sequencing of samples Reads distribution in different regions.
Group	Exon	Inrion	Intergenic
CK-1	0.8629	0.0287	0.1084
CK-2	0.8567	0.0286	0.1147
CK-3	0.8474	0.0301	0.1225
H4-1	0.8042	0.0423	0.1535
H4-2	0.8219	0.0361	0.142
H4-3	0.7999	0.0426	0.1575
H12-1	0.7965	0.0388	0.1647
H12-2	0.7969	0.0415	0.1616
H12-3	0.801	0.0398	0.1592
Average	0.820822	0.0365	0.142678
