# Supplementary material for: Hub Gene Identification and Heat-Stress-Related Transcriptional Regulation Mechanism in Cabbage (Brassica oleracea L.)
Source: MDPI journal article supplement (doi:10.3390/horticulturae9090977), 2023-08-30
Supplement: s1 [file s1 › Table S5.xlsx]

## Sheet: table S3 Statistics on the numb
Table S5. Statistics on the number of differentially expressed genes annotated.
DEG Set	Total	COG	GO	KEGG	KOG	NR	Pfam	Swiss-Prot	eggNOG
CK_vs_H12	14342	5036	11749	10395	8324	14331	12118	10884	12183
CK_vs_H4	11303	4065	9205	8179	6506	11294	9518	8611	9541
H4_vs_H12	2529	995	2085	1853	1393	2528	2154	1973	2150
