# Supplementary material for: Hub Gene Identification and Heat-Stress-Related Transcriptional Regulation Mechanism in Cabbage (Brassica oleracea L.)
Source: MDPI journal article supplement (doi:10.3390/horticulturae9090977), 2023-08-30
Supplement: s1 [file s1 › Table S6.xlsx]

## Sheet: CK vs H4
Table S6. Statistical analysis of KEGG enrichment results for differentially expressed genes.
Pathway	ko_ID	DEgene	gene	DEgene_all	gene_all	Gene_id	KOs	Up/Down
Protein processing in endoplasmic reticulum	ko04141	74	701	1752	19416	BolC01g003610.2J;BolC01g019620.2J;BolC01g022860.2J;BolC01g025330.2J;BolC01g030930.2J;BolC01g031880.2J;BolC01g033770.2J;BolC01g045860.2J;BolC01g048570.2J;BolC02g009960.2J;BolC02g010680.2J;BolC02g013130.2J;BolC02g017700.2J;BolC02g032340.2J;BolC02g034560.2J;BolC02g052630.2J;BolC03g002850.2J;BolC03g004520.2J;BolC03g017310.2J;BolC03g024470.2J;BolC03g025470.2J;BolC03g034310.2J;BolC03g045860.2J;BolC03g0…	K04523+K13993+K13993+K10578+K09580+K03283+K09523+K10578+K09523+K07151+K03868+K13993+K14006+K03094+K06689+K10666+K03283+K10956+K13993+K03237+K10666+K03347+K14018+K04523+K08852+K10661+K03283+K01230+K10666+K14006+K03283+K14007+K03283+K10661+K14026+K10666+K03094+K10084+K04079+K09562+K09487+K09561+K13993+K16196+K14026+K09580+K09540+K13993+K14026+K09580+K14006+K09518+K01456+K08852+K10666+K09517+K14012+…	Up
Nicotinate and nicotinamide metabolism	ko00760	1	52	1752	19416	BolC04g002180.2J	K01513	Up
Steroid biosynthesis	ko00100	8	88	1752	19416	BolC02g040080.2J;BolC03g006590.2J;BolC04g004870.2J;BolC05g009390.2J;BolC06g004830.2J;BolC07g041990.2J;BolC08g001570.2J;BolC09g067930.2J	K14423+K00559+K23558+K05917+K09828+K00511+K01052+K14674	Up
Phosphatidylinositol signaling system	ko04070	27	257	1752	19416	BolC01g004980.2J;BolC01g012790.2J;BolC01g015790.2J;BolC01g037410.2J;BolC01g047610.2J;BolC01g053340.2J;BolC01g057580.2J;BolC01g057640.2J;BolC02g001980.2J;BolC02g014070.2J;BolC02g034040.2J;BolC02g055130.2J;BolC02g061960.2J;BolC03g001910.2J;BolC03g035810.2J;BolC03g056750.2J;BolC03g078090.2J;BolC04g047660.2J;BolC05g023640.2J;BolC05g033840.2J;BolC05g057550.2J;BolC06g036980.2J;BolC06g037540.2J;BolC06g0…	K00913+K00901+K00981+K00921+K00921+K05857+K05857+K13024+K18081+K05857+K00889+K00889+K19801+K18081+K05857+K19801+K00889+K02183+K13711+K00888+K05857+K01099+K02183+K20279+K05857+K00981+K18081	Up
Histidine metabolism	ko00340	7	73	1752	19416	BolC03g085520.2J;BolC04g025300.2J;BolC05g002890.2J;BolC05g007550.2J;BolC08g001460.2J;BolC08g031420.2J;BolC08g035590.2J	K14085+K00765+K14152+K00765+K14152+K00128+K14152	Up
Caffeine metabolism	ko00232	3	6	1752	19416	BolC01g003930.2J;BolC02g037720.2J;BolC05g032430.2J	K00106+K00106+K00106	Up
Ribosome	ko03010	22	783	1752	19416	BolC01g026520.2J;BolC01g045420.2J;BolC01g049810.2J;BolC01g053650.2J;BolC02g008970.2J;BolC02g029930.2J;BolC02g062650.2J;BolC03g036930.2J;BolC03g080920.2J;BolC03g086710.2J;BolC04g036440.2J;BolC04g042040.2J;BolC04g054330.2J;BolC04g055630.2J;BolC05g013470.2J;BolC05g038990.2J;BolC05g040380.2J;BolC07g034710.2J;BolC08g026170.2J;BolC08g042660.2J;BolC08g053400.2J;BolC09g037560.2J	K02995+K02995+K02946+K02942+K02913+K02985+K02904+K02894+K02932+K02891+K02880+K02936+K02990+K02903+K02956+K02948+K02995+K02996+K02882+K02985+K02881+K02891	Up
Carotenoid biosynthesis	ko00906	6	91	1752	19416	BolC01g004780.2J;BolC03g084230.2J;BolC04g033500.2J;BolC05g041800.2J;BolC08g046930.2J;BolC08g052820.2J	K14595+K09841+K06444+K06444+K09841+K09841	Up
Ribosome biogenesis in eukaryotes	ko03008	36	296	1752	19416	BolC01g006830.2J;BolC01g011010.2J;BolC01g020070.2J;BolC01g027630.2J;BolC02g004660.2J;BolC02g035410.2J;BolC03g017520.2J;BolC03g035720.2J;BolC04g002410.2J;BolC04g054040.2J;BolC04g067960.2J;BolC05g000500.2J;BolC05g039250.2J;BolC05g049450.2J;BolC05g053410.2J;BolC06g002000.2J;BolC06g010370.2J;BolC06g029820.2J;BolC06g030580.2J;BolC06g044970.2J;BolC06g046890.2J;BolC06g048580.2J;BolC07g032390.2J;BolC07g0…	K14558+K03115+K14563+K07179+K14546+K03097+K14571+K14571+K14566+K14539+K14566+K11883+K14536+K14558+K14550+K11108+K14564+K14570+K14525+K03097+K12619+K14570+K14573+K14544+K14536+K03115+K06943+K14573+K14536+K14544+K14564+K03539+K14290+K12619+K11128+K11128	Up
Limonene and pinene degradation	ko00903	1	19	1752	19416	BolC08g031420.2J	K00128	Up
Valine, leucine and isoleucine biosynthesis	ko00290	3	61	1752	19416	BolC04g017440.2J;BolC08g021600.2J;BolC08g037720.2J	K01653+K00826+K01754	Up
Brassinosteroid biosynthesis	ko00905	3	28	1752	19416	BolC01g028080.2J;BolC02g002410.2J;BolC09g066290.2J	K09587+K09588+K09588	Up
Citrate cycle (TCA cycle)	ko00020	10	250	1752	19416	BolC01g001280.2J;BolC02g001040.2J;BolC03g075250.2J;BolC04g017470.2J;BolC06g038300.2J;BolC08g020990.2J;BolC08g042480.2J;BolC09g001960.2J;Brassica_oleracea_newGene_6192;Brassica_oleracea_newGene_9222	K01610+K00030+K01681+K00161+K00161+K01648+K01647+K00031+K00026+K01610	Up
Fatty acid metabolism	ko01212	26	155	1752	19416	BolC01g010220.2J;BolC01g031750.2J;BolC01g054030.2J;BolC01g055840.2J;BolC01g055880.2J;BolC01g055910.2J;BolC01g055950.2J;BolC02g048570.2J;BolC03g019710.2J;BolC03g038630.2J;BolC04g016040.2J;BolC04g023780.2J;BolC04g040480.2J;BolC05g055170.2J;BolC05g058870.2J;BolC05g058900.2J;BolC05g061440.2J;BolC06g025470.2J;BolC07g037360.2J;BolC08g001400.2J;BolC08g019440.2J;BolC08g036070.2J;BolC09g009570.2J;BolC09g0…	K10527+K03921+K10527+K00059+K00059+K00059+K00059+K00626+K07513+K10527+K07513+K01897+K00232+K00059+K10527+K00249+K00059+K01074+K00626+K07513+K10527+K00232+K00232+K09458+K00626+K10527	Up
Synthesis and degradation of ketone bodies	ko00072	4	11	1752	19416	BolC02g048570.2J;BolC05g010900.2J;BolC07g037360.2J;BolC09g027020.2J	K00626+K01640+K00626+K00626	Up
mRNA surveillance pathway	ko03015	62	349	1752	19416	BolC01g006170.2J;BolC01g009350.2J;BolC01g026170.2J;BolC01g034970.2J;BolC01g043090.2J;BolC02g004630.2J;BolC02g011870.2J;BolC02g016840.2J;BolC02g020080.2J;BolC02g048460.2J;BolC02g052080.2J;BolC02g052090.2J;BolC02g057250.2J;BolC02g063520.2J;BolC03g013500.2J;BolC03g014990.2J;BolC03g019870.2J;BolC03g023740.2J;BolC03g028610.2J;BolC03g038480.2J;BolC03g039510.2J;BolC03g069960.2J;BolC03g083730.2J;BolC04g0…	K14376+K14397+K11584+K14411+K13025+K12812+K14396+K14398+K13126+K14411+K11584+K11584+K06269+K14962+K14405+K14398+K14411+K14327+K06269+K14405+K11584+K14409+K12876+K14396+K13126+K13171+K12881+K14400+K14376+K06100+K14411+K03265+K14325+K03267+K14404+K06100+K14409+K14328+K11584+K11584+K12876+K13098+K14328+K12881+K14399+K04354+K08873+K14411+K03456+K03456+K03265+K11584+K11584+K14411+K14325+K03265+K04382+…	Up
Glycosphingolipid biosynthesis - lacto and neolacto series	ko00601	1	9	1752	19416	BolC03g076660.2J	K01988	Up
Selenocompound metabolism	ko00450	8	65	1752	19416	BolC03g073660.2J;BolC07g001010.2J;BolC07g004620.2J;BolC08g008060.2J;BolC09g012490.2J;Brassica_oleracea_newGene_1162;Brassica_oleracea_newGene_4014;Brassica_oleracea_newGene_5534	K00384+K00384+K13811+K01874+K00384+K13811+K13811+K13811	Up
Spliceosome	ko03040	139	672	1752	19416	BolC01g014330.2J;BolC01g015810.2J;BolC01g019940.2J;BolC01g024540.2J;BolC01g025650.2J;BolC01g027750.2J;BolC01g027810.2J;BolC01g031880.2J;BolC01g035630.2J;BolC01g036220.2J;BolC01g043090.2J;BolC01g044070.2J;BolC01g044750.2J;BolC01g049710.2J;BolC01g051440.2J;BolC02g004630.2J;BolC02g005390.2J;BolC02g005880.2J;BolC02g010210.2J;BolC02g017770.2J;BolC02g034380.2J;BolC02g035260.2J;BolC02g042490.2J;BolC02g0…	K12873+K12847+K12893+K12813+K12862+K12869+K12869+K03283+K12844+K12837+K13025+K12870+K12861+K12741+K12830+K12812+K12815+K12818+K12885+K12854+K12869+K12854+K12836+K11094+K12867+K12900+K12896+K12827+K03283+K12900+K12818+K12893+K12857+K12837+K12849+K12842+K12835+K12831+K12823+K12830+K12863+K12865+K12828+K12891+K12890+K12862+K03283+K12879+K12818+K12843+K12840+K12837+K12829+K12818+K12876+K12823+K12835+…	Up
Pantothenate and CoA biosynthesis	ko00770	8	111	1752	19416	BolC02g022000.2J;BolC02g055820.2J;BolC04g002180.2J;BolC04g004520.2J;BolC04g017440.2J;BolC04g066070.2J;BolC08g021600.2J;BolC08g031420.2J	K17839+K01918+K01513+K17839+K01653+K17839+K00826+K00128	Up
RNA transport	ko03013	81	786	1752	19416	BolC01g019180.2J;BolC01g043090.2J;BolC01g051390.2J;BolC01g053830.2J;BolC02g000750.2J;BolC02g004630.2J;BolC02g008590.2J;BolC02g020080.2J;BolC02g021170.2J;BolC02g029300.2J;BolC02g033140.2J;BolC02g035890.2J;BolC02g040250.2J;BolC03g009270.2J;BolC03g015720.2J;BolC03g023740.2J;BolC03g024160.2J;BolC03g024470.2J;BolC03g036390.2J;BolC03g057850.2J;BolC03g068610.2J;BolC03g081890.2J;BolC03g083730.2J;BolC03g0…	K03262+K13025+K03248+K03754+K14292+K12812+K03259+K13126+K03231+K03239+K03243+K14298+K14301+K03259+K14318+K14327+K03249+K03237+K03257+K03262+K12879+K02516+K12876+K14317+K13130+K14306+K03240+K13126+K13171+K13174+K12881+K03680+K14303+K03240+K13130+K14325+K03251+K14328+K14293+K03260+K03257+K03754+K12876+K13098+K00784+K14328+K03113+K03680+K09291+K14525+K12881+K14321+K09291+K14298+K18213+K03259+K03262+…	Up
Sulfur relay system	ko04122	2	23	1752	19416	BolC03g054400.2J;Brassica_oleracea_newGene_1633	K04487+K03639	Up
Cutin, suberine and wax biosynthesis	ko00073	7	164	1752	19416	BolC02g013900.2J;BolC02g031810.2J;BolC02g031820.2J;BolC04g006980.2J;BolC04g059260.2J;BolC05g054690.2J;BolC07g060110.2J	K15401+K15405+K15405+K20495+K17991+K13356+K15405	Up
Galactose metabolism	ko00052	37	419	1752	19416	BolC01g018170.2J;BolC01g048990.2J;BolC02g008200.2J;BolC02g010480.2J;BolC02g015850.2J;BolC02g052390.2J;BolC02g061800.2J;BolC02g063380.2J;BolC03g014110.2J;BolC03g028880.2J;BolC03g067450.2J;BolC03g068910.2J;BolC03g086460.2J;BolC04g015370.2J;BolC04g039680.2J;BolC05g010150.2J;BolC05g024580.2J;BolC05g048000.2J;BolC05g052870.2J;BolC06g008280.2J;BolC06g027020.2J;BolC07g032130.2J;BolC07g043670.2J;BolC08g0…	K01784+K12309+K01835+K06617+K12309+K07407+K12309+K12309+K12309+K12309+K01785+K01784+K06617+K00850+K12309+K01784+K01784+K01785+K12309+K00850+K12447+K12309+K00850+K12447+K01784+K12309+K01190+K06617+K12309+K12309+K12447+K06617+K00965+K00850+K12309+K12447+K12447	Up
Biosynthesis of amino acids	ko01230	49	701	1752	19416	BolC01g000950.2J;BolC01g005160.2J;BolC01g056270.2J;BolC02g001040.2J;BolC03g005380.2J;BolC03g006440.2J;BolC03g006680.2J;BolC03g014490.2J;BolC03g026760.2J;BolC03g037400.2J;BolC03g039100.2J;BolC03g066840.2J;BolC03g066850.2J;BolC03g075250.2J;BolC04g010970.2J;BolC04g011620.2J;BolC04g011650.2J;BolC04g015370.2J;BolC04g017440.2J;BolC04g025300.2J;BolC04g054650.2J;BolC04g061760.2J;BolC05g002890.2J;BolC05g0…	K01626+K01626+K22846+K00030+K14454+K00616+K01689+K00873+K15227+K01738+K05359+K01953+K01953+K01681+K01778+K00927+K00927+K00850+K01653+K00765+K00927+K01623+K14152+K01620+K00765+K01915+K00850+K01953+K01850+K00789+K00850+K14152+K00600+K01620+K01620+K00826+K00814+K00814+K14152+K01778+K01754+K01647+K00616+K00031+K01850+K14454+K00133+K01689+K00850	Up
Lysine biosynthesis	ko00300	3	54	1752	19416	BolC04g010970.2J;BolC08g037610.2J;BolC09g036830.2J	K01778+K01778+K00133	Up
Pentose phosphate pathway	ko00030	15	156	1752	19416	BolC02g008200.2J;BolC03g006440.2J;BolC04g015370.2J;BolC04g016100.2J;BolC04g016130.2J;BolC04g061760.2J;BolC06g008280.2J;BolC06g048050.2J;BolC07g043670.2J;BolC08g054870.2J;BolC09g016010.2J;BolC09g023030.2J;BolC09g043160.2J;BolCnng006370.2J;Brassica_oleracea_newGene_7236	K01835+K00616+K00850+K03841+K03841+K01623+K00850+K00895+K00850+K00616+K00033+K01810+K00895+K00850+K01057	Up
Fatty acid biosynthesis	ko00061	9	105	1752	19416	BolC01g031750.2J;BolC01g055840.2J;BolC01g055880.2J;BolC01g055910.2J;BolC01g055950.2J;BolC04g023780.2J;BolC05g055170.2J;BolC05g061440.2J;BolC09g025780.2J	K03921+K00059+K00059+K00059+K00059+K01897+K00059+K00059+K09458	Up
Arginine and proline metabolism	ko00330	25	204	1752	19416	BolC02g022000.2J;BolC03g005380.2J;BolC03g058810.2J;BolC03g085520.2J;BolC04g004520.2J;BolC04g006940.2J;BolC04g044410.2J;BolC04g053460.2J;BolC04g066070.2J;BolC05g047990.2J;BolC05g059360.2J;BolC06g002890.2J;BolC06g002900.2J;BolC07g023190.2J;BolC07g028770.2J;BolC07g036010.2J;BolC07g052320.2J;BolC08g031420.2J;BolC08g031430.2J;BolC09g003690.2J;BolC09g014750.2J;BolC09g033000.2J;BolC09g053700.2J;BolC09g0…	K17839+K14454+K00294+K14085+K17839+K01583+K14329+K14329+K17839+K01426+K00472+K01426+K01426+K00472+K00819+K00472+K00472+K00128+K00797+K00472+K14454+K13427+K00472+K01426+K01611	Up
Tropane, piperidine and pyridine alkaloid biosynthesis	ko00960	15	116	1752	19416	BolC02g018560.2J;BolC02g039920.2J;BolC03g005380.2J;BolC03g028630.2J;BolC03g085200.2J;BolC04g055850.2J;BolC04g055920.2J;BolC04g055950.2J;BolC04g065780.2J;BolC07g022190.2J;BolC08g017970.2J;BolC09g003110.2J;BolC09g014750.2J;BolC09g022370.2J;BolC09g059360.2J	K00815+K00276+K14454+K08081+K00276+K08081+K08081+K08081+K00276+K00276+K08081+K00276+K14454+K08081+K08081	Up
Homologous recombination	ko03440	26	620	1752	19416	BolC01g003030.2J;BolC01g021860.2J;BolC01g044350.2J;BolC01g055510.2J;BolC02g026460.2J;BolC02g031070.2J;BolC02g031370.2J;BolC02g042360.2J;BolC02g050770.2J;BolC03g039400.2J;BolC03g055170.2J;BolC03g061070.2J;BolC03g062580.2J;BolC04g011050.2J;BolC04g015210.2J;BolC04g028740.2J;BolC04g051250.2J;BolC04g058410.2J;BolC05g022210.2J;BolC05g043390.2J;BolC06g003540.2J;BolC07g028380.2J;BolC08g048760.2J;BolC09g0…	K12173+K10875+K03111+K10728+K07466+K07466+K12173+K02328+K10683+K03553+K07466+K04728+K07466+K10683+K07466+K07466+K07466+K07466+K03505+K02335+K07466+K07466+K10882+K07466+K10865+K07466	Up
Plant-pathogen interaction	ko04626	154	1497	1752	19416	BolC01g000330.2J;BolC01g001920.2J;BolC01g004240.2J;BolC01g008700.2J;BolC01g013150.2J;BolC01g018520.2J;BolC01g019930.2J;BolC01g022090.2J;BolC01g025070.2J;BolC01g025350.2J;BolC01g035180.2J;BolC01g042110.2J;BolC01g052010.2J;BolC01g052780.2J;BolC01g054550.2J;BolC02g008750.2J;BolC02g009050.2J;BolC02g012410.2J;BolC02g019310.2J;BolC02g025450.2J;BolC02g025920.2J;BolC02g045520.2J;BolC02g045530.2J;BolC02g0…	K01373+K13448+K18878+K05391+K16226+K13425+K13412+K13459+K15397+K01373+K13457+K13466+K13412+K13420+K16224+K16226+K16226+K16226+K13434+K18878+K13416+K16226+K16226+K16226+K16226+K16226+K16226+K13459+K13430+K13457+K13448+K18875+K13430+K13428+K04368+K13430+K16224+K13416+K13423+K13436+K13416+K16226+K16226+K14512+K13436+K13430+K13412+K16226+K16225+K16226+K13414+K13414+K13425+K13412+K18878+K01373+K18878+…	Up
Arachidonic acid metabolism	ko00590	8	77	1752	19416	BolC01g009990.2J;BolC03g016420.2J;BolC04g030200.2J;BolC05g001460.2J;BolC05g053050.2J;BolC09g031890.2J;BolC09g039770.2J;BolC09g067930.2J	K18592+K08726+K00432+K15730+K00079+K00432+K08726+K14674	Up
alpha-Linolenic acid metabolism	ko00592	18	117	1752	19416	BolC01g010220.2J;BolC01g013500.2J;BolC01g054030.2J;BolC03g019710.2J;BolC03g038630.2J;BolC04g016040.2J;BolC04g040480.2J;BolC04g041630.2J;BolC05g058870.2J;BolC06g001260.2J;BolC08g001400.2J;BolC08g019440.2J;BolC08g020930.2J;BolC08g036070.2J;BolC09g009570.2J;BolC09g067930.2J;Brassica_oleracea_newGene_4598;Brassica_oleracea_newGene_6186	K10527+K22389+K10527+K07513+K10527+K07513+K00232+K16818+K10527+K16818+K07513+K10527+K05894+K00232+K00232+K14674+K18857+K10527	Up
Porphyrin and chlorophyll metabolism	ko00860	11	121	1752	19416	BolC01g001910.2J;BolC01g021480.2J;BolC01g032830.2J;BolC03g033680.2J;BolC04g041840.2J;BolC04g067000.2J;BolC05g002770.2J;BolC05g057180.2J;BolC08g059720.2J;BolC08g059740.2J;BolC09g023870.2J	K13545+K01885+K13071+K19054+K13606+K02257+K18010+K08101+K00228+K00228+K08099	Up
One carbon pool by folate	ko00670	2	57	1752	19416	BolC04g063230.2J;BolC08g009930.2J	K00288+K00600	Up
Phenylpropanoid biosynthesis	ko00940	36	734	1752	19416	BolC01g005260.2J;BolC01g020840.2J;BolC01g026220.2J;BolC01g056260.2J;BolC02g018330.2J;BolC02g034740.2J;BolC02g056730.2J;BolC02g063080.2J;BolC03g011000.2J;BolC03g052390.2J;BolC03g079880.2J;BolC03g079890.2J;BolC04g032580.2J;BolC04g049550.2J;BolC04g056700.2J;BolC05g023580.2J;BolC05g028780.2J;BolC05g029600.2J;BolC06g005980.2J;BolC06g007670.2J;BolC06g010350.2J;BolC07g007980.2J;BolC07g015020.2J;BolC07g0…	K00430+K00588+K13065+K01188+K00430+K00430+K13065+K00430+K05349+K23260+K23260+K23260+K01188+K00430+K00487+K22395+K22395+K13065+K23260+K18368+K00430+K23260+K22395+K22395+K13066+K00430+K13066+K01188+K01188+K18368+K00430+K22395+K13065+K01904+K01188+K00430	Up
Flavonoid biosynthesis	ko00941	13	147	1752	19416	BolC01g020840.2J;BolC01g025250.2J;BolC01g026220.2J;BolC02g002400.2J;BolC02g056730.2J;BolC04g056700.2J;BolC05g029600.2J;BolC05g049710.2J;BolC06g020150.2J;BolC06g044770.2J;BolC08g036870.2J;BolC09g013550.2J;BolCnng001120.2J	K00588+K05278+K13065+K05278+K13065+K00487+K13065+K22845+K01859+K13082+K01859+K13065+K01859	Up
Glucosinolate biosynthesis	ko00966	2	137	1752	19416	BolC04g019800.2J;BolC08g021600.2J	K11820+K00826	Up
Biosynthesis of unsaturated fatty acids	ko01040	10	46	1752	19416	BolC01g031750.2J;BolC02g036770.2J;BolC03g019710.2J;BolC03g035400.2J;BolC04g016040.2J;BolC04g040480.2J;BolC05g000310.2J;BolC08g001400.2J;BolC08g036070.2J;BolC09g009570.2J	K03921+K01068+K07513+K01068+K07513+K00232+K01068+K07513+K00232+K00232	Up
Phagosome	ko04145	14	257	1752	19416	BolC01g012330.2J;BolC01g037410.2J;BolC01g047610.2J;BolC02g010010.2J;BolC03g004520.2J;BolC04g020470.2J;BolC05g030580.2J;BolC06g006820.2J;BolC07g029450.2J;BolC07g045540.2J;BolC07g047140.2J;BolC08g021750.2J;BolC08g033910.2J;BolC09g014770.2J	K02155+K00921+K00921+K07374+K10956+K07375+K08488+K07897+K08488+K02155+K08488+K01368+K02146+K02154	Up
Fatty acid degradation	ko00071	24	107	1752	19416	BolC01g010220.2J;BolC01g054030.2J;BolC02g013900.2J;BolC02g037610.2J;BolC02g048570.2J;BolC03g019710.2J;BolC03g038630.2J;BolC03g085520.2J;BolC04g006980.2J;BolC04g016040.2J;BolC04g023780.2J;BolC04g040480.2J;BolC05g058870.2J;BolC05g058900.2J;BolC07g037360.2J;BolC08g001400.2J;BolC08g013810.2J;BolC08g019440.2J;BolC08g031420.2J;BolC08g036070.2J;BolC09g009570.2J;BolC09g027020.2J;Brassica_oleracea_newGene…	K10527+K10527+K15401+K07517+K00626+K07513+K10527+K14085+K20495+K07513+K01897+K00232+K10527+K00249+K00626+K07513+K07517+K10527+K00128+K00232+K00232+K00626+K18857+K10527	Up
Monobactam biosynthesis	ko00261	5	35	1752	19416	BolC07g004620.2J;BolC09g036830.2J;Brassica_oleracea_newGene_1162;Brassica_oleracea_newGene_4014;Brassica_oleracea_newGene_5534	K13811+K00133+K13811+K13811+K13811	Up
RNA polymerase	ko03020	22	230	1752	19416	BolC01g014950.2J;BolC02g045370.2J;BolC02g054830.2J;BolC03g004430.2J;BolC03g047990.2J;BolC03g056060.2J;BolC04g015870.2J;BolC04g025470.2J;BolC05g000790.2J;BolC07g015700.2J;BolC07g027390.2J;BolC07g037590.2J;BolC07g038500.2J;BolC07g042330.2J;BolC08g000280.2J;Brassica_oleracea_newGene_1251;Brassica_oleracea_newGene_2432;Brassica_oleracea_newGene_2577;Brassica_oleracea_newGene_5110;Brassica_oleracea_ne…	K03010+K03021+K03006+K03012+K03013+K03010+K03006+K03002+K03046+K03002+K03021+K03013+K14721+K03025+K03022+K03006+K03006+K03006+K03006+K03006+K03006+K03006	Up
Ether lipid metabolism	ko00565	16	78	1752	19416	BolC01g027720.2J;BolC02g058510.2J;BolC02g062620.2J;BolC03g055370.2J;BolC05g005180.2J;BolC05g045960.2J;BolC06g042650.2J;BolC07g044520.2J;BolC07g058440.2J;BolC08g035450.2J;BolC08g053890.2J;BolC08g053940.2J;BolC09g012130.2J;BolC09g012860.2J;BolC09g034640.2J;BolC09g067930.2J	K01062+K01115+K06123+K06123+K01114+K00993+K01062+K01062+K01115+K01062+K00993+K00993+K01062+K01062+K01114+K14674	Up
Pentose and glucuronate interconversions	ko00040	28	694	1752	19416	BolC01g020190.2J;BolC01g048390.2J;BolC02g001250.2J;BolC02g015040.2J;BolC02g052640.2J;BolC03g063650.2J;BolC03g066620.2J;BolC04g010560.2J;BolC04g012570.2J;BolC04g023180.2J;BolC06g027020.2J;BolC06g030150.2J;BolC06g030170.2J;BolC07g032350.2J;BolC07g034420.2J;BolC08g004530.2J;BolC08g005840.2J;BolC09g003150.2J;BolC09g007980.2J;BolC09g018090.2J;BolC09g031050.2J;BolC09g035840.2J;BolC09g037370.2J;BolC09g0…	K01805+K01051+K01051+K01805+K16190+K01051+K00854+K00002+K00002+K01728+K12447+K01051+K01051+K01728+K16190+K12447+K01051+K16190+K01051+K01051+K01051+K12447+K01805+K01805+K01184+K16190+K12447+K12447	Up
Aminoacyl-tRNA biosynthesis	ko00970	31	388	1752	19416	BolC01g003460.2J;BolC01g012550.2J;BolC01g021480.2J;BolC02g005870.2J;BolC02g007240.2J;BolC03g014260.2J;BolC03g032770.2J;BolC03g036370.2J;BolC03g041090.2J;BolC03g052990.2J;BolC03g056350.2J;BolC03g076620.2J;BolC03g079580.2J;BolC04g012930.2J;BolC04g036270.2J;BolC04g037640.2J;BolC05g017380.2J;BolC05g049690.2J;BolC07g006130.2J;BolC07g058260.2J;BolC08g006670.2J;BolC08g008060.2J;BolC08g056480.2J;BolC09g0…	K01866+K01870+K01885+K01872+K01890+K01893+K01867+K01892+K04567+K01866+K02433+K01867+K02433+K01870+K01880+K01867+K02433+K01872+K01867+K01866+K01883+K01874+K01869+K01866+K01889+K01872+K01867+K01867+K02434+K22503+K02433	Up
Purine metabolism	ko00230	37	315	1752	19416	BolC01g003930.2J;BolC01g010710.2J;BolC01g051420.2J;BolC01g055720.2J;BolC02g008200.2J;BolC02g037720.2J;BolC02g052920.2J;BolC02g059100.2J;BolC03g014100.2J;BolC03g014490.2J;BolC03g054100.2J;BolC04g002180.2J;BolC04g008750.2J;BolC04g009910.2J;BolC04g056170.2J;BolC04g065490.2J;BolC05g013910.2J;BolC05g032430.2J;BolC05g041390.2J;BolC05g041770.2J;BolC05g053430.2J;BolC05g058480.2J;BolC05g059420.2J;BolC05g0…	K00106+K01510+K13484+K14641+K01835+K00106+K10808+K01768+K14641+K00873+K00860+K01513+K00939+K01490+K01768+K01768+K00088+K00106+K00759+K01923+K14641+K00988+K00942+K00942+K00759+K00764+K13811+K10808+K10807+K01768+K13484+K13811+K13811+K13811+K01768+K01768+K01768	Up
Alanine, aspartate and glutamate metabolism	ko00250	19	147	1752	19416	BolC01g040500.2J;BolC02g003000.2J;BolC03g005380.2J;BolC03g005700.2J;BolC03g023030.2J;BolC03g058810.2J;BolC03g066840.2J;BolC03g066850.2J;BolC05g048210.2J;BolC06g040180.2J;BolC06g045790.2J;BolC06g050360.2J;BolC07g012960.2J;BolC08g026300.2J;BolC08g026350.2J;BolC09g014750.2J;BolC09g055090.2J;BolC09g063930.2J;Brassica_oleracea_newGene_4103	K16871+K00261+K14454+K13566+K00827+K00294+K01953+K01953+K01915+K01953+K00764+K17761+K00820+K00814+K00814+K14454+K00261+K13051+K00262	Up
Glycerolipid metabolism	ko00561	23	284	1752	19416	BolC01g012790.2J;BolC01g013600.2J;BolC02g005810.2J;BolC02g052390.2J;BolC03g085520.2J;BolC04g010560.2J;BolC04g012570.2J;BolC04g015640.2J;BolC05g030420.2J;BolC05g048270.2J;BolC06g008960.2J;BolC06g033980.2J;BolC06g050980.2J;BolC06g051000.2J;BolC07g002350.2J;BolC07g044710.2J;BolC07g048210.2J;BolC07g048690.2J;BolC08g005290.2J;BolC08g031420.2J;BolC09g053110.2J;BolC09g057040.2J;BolC09g067930.2J	K00901+K00655+K00679+K07407+K14085+K00002+K00002+K00655+K00630+K00863+K00679+K00679+K00864+K00864+K11155+K22848+K00679+K00655+K22849+K00128+K01054+K01054+K14674	Up
Basal transcription factors	ko03022	16	125	1752	19416	BolC01g007320.2J;BolC01g010250.2J;BolC02g007030.2J;BolC02g025910.2J;BolC02g052540.2J;BolC02g058740.2J;BolC04g046880.2J;BolC05g015050.2J;BolC05g028500.2J;BolC05g062580.2J;BolC06g045370.2J;BolC07g034180.2J;BolC08g001620.2J;BolC08g011420.2J;BolC08g027010.2J;BolC09g057640.2J	K03134+K02202+K14649+K03141+K03122+K03130+K10843+K03126+K03137+K14649+K03128+K03122+K03142+K03125+K03143+K14649	Up
RNA degradation	ko03018	53	645	1752	19416	BolC01g001250.2J;BolC01g012360.2J;BolC01g026550.2J;BolC01g049630.2J;BolC02g007330.2J;BolC02g020080.2J;BolC02g027600.2J;BolC02g053550.2J;BolC03g006680.2J;BolC03g012630.2J;BolC03g029770.2J;BolC03g058170.2J;BolC03g064040.2J;BolC04g015370.2J;BolC04g020360.2J;BolC04g022510.2J;BolC04g026910.2J;BolC04g042280.2J;BolC04g057000.2J;BolC05g014290.2J;BolC05g056820.2J;BolC05g061410.2J;BolC06g008280.2J;BolC06g0…	K04043+K12598+K12617+K12616+K01148+K13126+K12598+K01148+K01689+K12593+K03514+K10643+K11600+K00850+K13126+K04077+K12617+K12607+K14442+K12617+K12598+K12580+K00850+K03678+K12598+K12598+K12598+K12598+K12603+K12619+K12600+K12617+K01148+K01148+K14442+K12592+K00850+K18681+K12585+K12585+K12585+K12585+K12611+K04077+K12604+K12585+K12598+K04077+K01689+K00850+K12619+K12617+K12617	Up
Ascorbate and aldarate metabolism	ko00053	18	389	1752	19416	BolC01g049530.2J;BolC02g052640.2J;BolC03g046440.2J;BolC03g085520.2J;BolC06g027020.2J;BolC07g034420.2J;BolC07g042590.2J;BolC07g052660.2J;BolC07g053020.2J;BolC08g004530.2J;BolC08g031420.2J;BolC09g003150.2J;BolC09g014040.2J;BolC09g035840.2J;BolC09g058690.2J;Brassica_oleracea_newGene_4655;Brassica_oleracea_newGene_5033;Brassica_oleracea_newGene_6544	K00423+K16190+K21888+K14085+K12447+K16190+K00434+K00469+K14190+K12447+K00128+K16190+K00469+K12447+K16190+K12447+K00469+K12447	Up
Non-homologous end-joining	ko03450	2	17	1752	19416	BolC08g022060.2J;BolC09g041540.2J	K03512+K10865	Up
Nitrogen metabolism	ko00910	11	133	1752	19416	BolC01g001510.2J;BolC01g005130.2J;BolC01g034460.2J;BolC02g003000.2J;BolC02g007890.2J;BolC03g056470.2J;BolC04g065040.2J;BolC05g048210.2J;BolC07g019950.2J;BolC09g055090.2J;Brassica_oleracea_newGene_4103	K01455+K01673+K01673+K00261+K01501+K01673+K00284+K01915+K01673+K00261+K00262	Up
Circadian rhythm - plant	ko04712	40	227	1752	19416	BolC01g011010.2J;BolC01g053660.2J;BolC02g000830.2J;BolC02g015500.2J;BolC02g035410.2J;BolC02g059060.2J;BolC03g008870.2J;BolC03g047180.2J;BolC03g067250.2J;BolC04g000530.2J;BolC04g007080.2J;BolC04g053380.2J;BolC04g053420.2J;BolC05g007340.2J;BolC05g021100.2J;BolC05g034050.2J;BolC05g041400.2J;BolC05g058020.2J;BolC05g058080.2J;BolC06g017050.2J;BolC06g035660.2J;BolC06g043460.2J;BolC06g044970.2J;BolC07g0…	K03115+K12135+K12129+K12129+K03097+K12130+K12133+K12115+K16221+K12135+K16221+K12125+K12125+K12120+K12124+K12130+K16241+K12115+K12135+K12121+K12135+K16221+K03097+K12133+K12130+K12130+K12130+K12127+K03115+K12119+K12126+K12125+K12126+K12120+K12126+K12127+K16240+K12135+K12135+K12129	Up
2-Oxocarboxylic acid metabolism	ko01210	12	293	1752	19416	BolC02g001040.2J;BolC03g005380.2J;BolC03g075250.2J;BolC04g017440.2J;BolC04g019800.2J;BolC08g021600.2J;BolC08g026300.2J;BolC08g026350.2J;BolC08g042480.2J;BolC09g001960.2J;BolC09g014750.2J;BolC09g036830.2J	K00030+K14454+K01681+K01653+K11820+K00826+K00814+K00814+K01647+K00031+K14454+K00133	Up
Valine, leucine and isoleucine degradation	ko00280	27	135	1752	19416	BolC01g040110.2J;BolC02g013880.2J;BolC02g048570.2J;BolC02g063610.2J;BolC03g012890.2J;BolC03g019710.2J;BolC03g023030.2J;BolC03g038620.2J;BolC03g065200.2J;BolC03g080020.2J;BolC03g085520.2J;BolC03g086240.2J;BolC04g016040.2J;BolC05g010900.2J;BolC05g015890.2J;BolC05g019730.2J;BolC05g058900.2J;BolC07g037360.2J;BolC08g001400.2J;BolC08g021600.2J;BolC08g031420.2J;BolC08g059800.2J;BolC09g018470.2J;BolC09g0…	K01968+K01968+K00626+K05605+K01968+K07513+K00827+K09699+K00253+K01969+K14085+K00167+K07513+K01640+K00020+K00166+K00249+K00626+K07513+K00826+K00128+K01968+K01968+K00626+K01968+K01968+K00020	Up
Monoterpenoid biosynthesis	ko00902	1	13	1752	19416	BolC03g029860.2J	K12467	Up
Other glycan degradation	ko00511	24	140	1752	19416	BolC01g048990.2J;BolC02g015850.2J;BolC02g023850.2J;BolC02g024140.2J;BolC02g052030.2J;BolC02g061800.2J;BolC02g063380.2J;BolC03g014110.2J;BolC03g028880.2J;BolC03g030890.2J;BolC03g068540.2J;BolC04g039680.2J;BolC05g052870.2J;BolC06g011920.2J;BolC07g032130.2J;BolC07g033820.2J;BolC07g034150.2J;BolC07g034410.2J;BolC07g043620.2J;BolC08g034830.2J;BolC08g038280.2J;BolC09g027680.2J;BolC09g027690.2J;Brassica…	K12309+K12309+K01206+K01191+K01191+K12309+K12309+K12309+K12309+K01191+K01191+K12309+K12309+K17108+K12309+K01191+K01206+K01191+K01444+K12309+K01190+K12309+K12309+K12309	Up
Isoflavonoid biosynthesis	ko00943	3	29	1752	19416	BolC02g054060.2J;BolC09g062040.2J;BolC09g062110.2J	K13260+K13260+K13260	Up
DNA replication	ko03030	20	598	1752	19416	BolC01g040220.2J;BolC01g044350.2J;BolC02g026460.2J;BolC02g031070.2J;BolC02g042360.2J;BolC03g011210.2J;BolC03g055170.2J;BolC03g062580.2J;BolC04g015210.2J;BolC04g028740.2J;BolC04g051250.2J;BolC04g058410.2J;BolC05g022210.2J;BolC05g043390.2J;BolC06g003540.2J;BolC06g048740.2J;BolC07g028380.2J;BolC08g057260.2J;BolC09g040420.2J;BolC09g054190.2J	K02209+K03111+K07466+K07466+K02328+K10754+K07466+K07466+K07466+K07466+K07466+K07466+K03505+K02335+K07466+K10754+K07466+K10747+K07466+K07466	Up
Tryptophan metabolism	ko00380	21	212	1752	19416	BolC01g003780.2J;BolC01g003790.2J;BolC02g007890.2J;BolC02g036160.2J;BolC02g036240.2J;BolC02g048570.2J;BolC03g062440.2J;BolC03g085520.2J;BolC04g019800.2J;BolC04g031180.2J;BolC05g047990.2J;BolC06g002890.2J;BolC06g002900.2J;BolC06g006180.2J;BolC07g022200.2J;BolC07g037360.2J;BolC08g028740.2J;BolC08g031420.2J;BolC09g027020.2J;BolC09g064460.2J;Brassica_oleracea_newGene_4994	K03781+K03781+K01501+K00837+K23947+K00626+K11817+K14085+K11820+K03781+K01426+K01426+K01426+K11816+K03781+K00626+K03781+K00128+K00626+K01426+K22450	Up
Butanoate metabolism	ko00650	8	71	1752	19416	BolC01g040500.2J;BolC02g048570.2J;BolC04g017440.2J;BolC05g010900.2J;BolC06g050360.2J;BolC07g005250.2J;BolC07g037360.2J;BolC09g027020.2J	K16871+K00626+K01653+K01640+K17761+K01913+K00626+K00626	Up
Amino sugar and nucleotide sugar metabolism	ko00520	38	867	1752	19416	BolC01g018170.2J;BolC01g019010.2J;BolC01g025490.2J;BolC02g008200.2J;BolC02g026190.2J;BolC02g040070.2J;BolC02g052640.2J;BolC02g055270.2J;BolC02g056220.2J;BolC03g012740.2J;BolC03g056210.2J;BolC03g067110.2J;BolC03g068910.2J;BolC04g018340.2J;BolC04g063870.2J;BolC05g001290.2J;BolC05g004810.2J;BolC05g005740.2J;BolC05g010150.2J;BolC05g024580.2J;BolC06g014810.2J;BolC06g025090.2J;BolC06g027020.2J;BolC06g0…	K01784+K08678+K12446+K01835+K00326+K08679+K16190+K00847+K15920+K08678+K15920+K13648+K01784+K00847+K00966+K15920+K13648+K01183+K01784+K01784+K12450+K00847+K12447+K08678+K00820+K12448+K16190+K15920+K12447+K12448+K01784+K16190+K01810+K12447+K00965+K16190+K12447+K12447	Up
Folate biosynthesis	ko00790	5	62	1752	19416	BolC01g002000.2J;BolC04g050760.2J;BolC05g053050.2J;BolC08g048540.2J;Brassica_oleracea_newGene_1633	K15631+K15631+K00079+K14652+K03639	Up
Phenylalanine metabolism	ko00360	14	135	1752	19416	BolC02g018560.2J;BolC02g039920.2J;BolC03g005380.2J;BolC03g085200.2J;BolC04g065780.2J;BolC05g004680.2J;BolC05g047990.2J;BolC06g002890.2J;BolC06g002900.2J;BolC07g022190.2J;BolC08g058130.2J;BolC09g003110.2J;BolC09g014750.2J;BolC09g064460.2J	K00815+K00276+K14454+K00276+K00276+K00457+K01426+K01426+K01426+K00276+K00457+K00276+K14454+K01426	Up
Glycosphingolipid biosynthesis - ganglio series	ko00604	13	70	1752	19416	BolC01g048990.2J;BolC02g015850.2J;BolC02g061800.2J;BolC02g063380.2J;BolC03g014110.2J;BolC03g028880.2J;BolC04g039680.2J;BolC05g052870.2J;BolC07g032130.2J;BolC08g034830.2J;BolC09g027680.2J;BolC09g027690.2J;Brassica_oleracea_newGene_3476	K12309+K12309+K12309+K12309+K12309+K12309+K12309+K12309+K12309+K12309+K12309+K12309+K12309	Up
Isoquinoline alkaloid biosynthesis	ko00950	8	87	1752	19416	BolC02g018560.2J;BolC02g039920.2J;BolC03g005380.2J;BolC03g085200.2J;BolC04g065780.2J;BolC07g022190.2J;BolC09g003110.2J;BolC09g014750.2J	K00815+K00276+K14454+K00276+K00276+K00276+K00276+K14454	Up
Cyanoamino acid metabolism	ko00460	13	256	1752	19416	BolC01g001510.2J;BolC01g002040.2J;BolC01g009990.2J;BolC01g056260.2J;BolC02g007890.2J;BolC03g011000.2J;BolC04g032580.2J;BolC08g009930.2J;BolC08g043460.2J;BolC08g043480.2J;BolC08g047770.2J;BolC09g063930.2J;BolC09g064790.2J	K01455+K20802+K18592+K01188+K01501+K05349+K01188+K00600+K01188+K01188+K20802+K13051+K01188	Up
Starch and sucrose metabolism	ko00500	53	629	1752	19416	BolC01g007930.2J;BolC01g031610.2J;BolC01g035560.2J;BolC01g047050.2J;BolC01g056260.2J;BolC02g008200.2J;BolC02g014480.2J;BolC02g016810.2J;BolC02g027090.2J;BolC02g027100.2J;BolC02g029780.2J;BolC02g055270.2J;BolC03g010950.2J;BolC03g011000.2J;BolC03g014970.2J;BolC03g049010.2J;BolC03g066560.2J;BolC04g002180.2J;BolC04g007240.2J;BolC04g012540.2J;BolC04g018340.2J;BolC04g025680.2J;BolC04g032580.2J;BolC05g0…	K19893+K01176+K16055+K19891+K01188+K01835+K19893+K01177+K16055+K19891+K00695+K00847+K19893+K05349+K01177+K01177+K00688+K01513+K01177+K00700+K00847+K16055+K01188+K01087+K19891+K19891+K19891+K00847+K00695+K16055+K01176+K01179+K00695+K00688+K01087+K00696+K01179+K01194+K01176+K16055+K00695+K00695+K01188+K01188+K00695+K00705+K16055+K01810+K01176+K00695+K00695+K01188+K01214	Up
beta-Alanine metabolism	ko00410	15	167	1752	19416	BolC02g022000.2J;BolC02g039920.2J;BolC02g055820.2J;BolC02g063610.2J;BolC03g085200.2J;BolC03g085520.2J;BolC04g004520.2J;BolC04g040480.2J;BolC04g065780.2J;BolC04g066070.2J;BolC07g022190.2J;BolC08g031420.2J;BolC08g036070.2J;BolC09g003110.2J;BolC09g009570.2J	K17839+K00276+K01918+K05605+K00276+K14085+K17839+K00232+K00276+K17839+K00276+K00128+K00232+K00276+K00232	Up
Glycosaminoglycan degradation	ko00531	13	79	1752	19416	BolC01g048990.2J;BolC02g015850.2J;BolC02g061800.2J;BolC02g063380.2J;BolC03g014110.2J;BolC03g028880.2J;BolC04g039680.2J;BolC05g052870.2J;BolC07g032130.2J;BolC08g034830.2J;BolC09g027680.2J;BolC09g027690.2J;Brassica_oleracea_newGene_3476	K12309+K12309+K12309+K12309+K12309+K12309+K12309+K12309+K12309+K12309+K12309+K12309+K12309	Up
Betalain biosynthesis	ko00965	1	56	1752	19416	BolC09g013060.2J	K15777	Up
Sulfur metabolism	ko00920	15	90	1752	19416	BolC01g015360.2J;BolC02g039130.2J;BolC03g037400.2J;BolC03g054100.2J;BolC03g085220.2J;BolC04g028240.2J;BolC05g058480.2J;BolC05g063700.2J;BolC06g008580.2J;BolC07g004620.2J;BolC07g049530.2J;BolC09g041670.2J;Brassica_oleracea_newGene_1162;Brassica_oleracea_newGene_4014;Brassica_oleracea_newGene_5534	K05907+K05907+K01738+K00860+K17725+K05907+K00988+K05907+K17725+K13811+K05907+K01082+K13811+K13811+K13811	Up
Benzoxazinoid biosynthesis	ko00402	5	31	1752	19416	BolC03g012520.2J;BolC03g012530.2J;BolC04g057090.2J;BolC05g004150.2J;BolC05g004160.2J	K13229+K13229+K13229+K13229+K13229	Up
ABC transporters	ko02010	14	208	1752	19416	BolC01g049840.2J;BolC03g025260.2J;BolC03g061370.2J;BolC03g067420.2J;BolC03g067430.2J;BolC03g084920.2J;BolC04g036740.2J;BolC04g061640.2J;BolC05g002360.2J;BolC05g034620.2J;BolC06g020800.2J;BolC07g004900.2J;BolC07g047480.2J;BolC07g051980.2J	K05666+K05643+K05643+K05643+K05643+K05681+K05658+K08712+K05666+K05666+K08712+K05658+K05658+K05658	Up
C5-Branched dibasic acid metabolism	ko00660	1	26	1752	19416	BolC04g017440.2J	K01653	Up
Carbon fixation in photosynthetic organisms	ko00710	19	278	1752	19416	BolC01g001280.2J;BolC01g012240.2J;BolC01g025950.2J;BolC01g025970.2J;BolC03g005380.2J;BolC04g011620.2J;BolC04g011650.2J;BolC04g016100.2J;BolC04g016130.2J;BolC04g054650.2J;BolC04g061760.2J;BolC05g023740.2J;BolC06g004090.2J;BolC06g022400.2J;BolC08g026300.2J;BolC08g026350.2J;BolC09g014750.2J;Brassica_oleracea_newGene_6192;Brassica_oleracea_newGene_9222	K01610+K01595+K01006+K01006+K14454+K00927+K00927+K03841+K03841+K00927+K01623+K01595+K01595+K01595+K00814+K00814+K14454+K00026+K01610	Up
Proteasome	ko03050	14	300	1752	19416	BolC01g028190.2J;BolC03g042410.2J;BolC04g024150.2J;BolC04g040510.2J;BolC04g058750.2J;BolC05g005700.2J;BolC05g021330.2J;BolC06g045580.2J;BolC07g016500.2J;BolC07g054310.2J;BolC08g036110.2J;BolC08g057360.2J;Brassica_oleracea_newGene_3762;Brassica_oleracea_newGene_7696	K02737+K06699+K03064+K02732+K03035+K02725+K02735+K02726+K03036+K03062+K03028+K02725+K02728+K02737	Up
Glycerophospholipid metabolism	ko00564	34	322	1752	19416	BolC01g012790.2J;BolC01g013500.2J;BolC01g013600.2J;BolC01g015790.2J;BolC01g020460.2J;BolC02g035750.2J;BolC02g058510.2J;BolC02g062620.2J;BolC03g037640.2J;BolC03g055370.2J;BolC04g015640.2J;BolC04g016790.2J;BolC04g041630.2J;BolC05g003730.2J;BolC05g005180.2J;BolC05g030420.2J;BolC05g045960.2J;BolC06g001260.2J;BolC07g038840.2J;BolC07g038880.2J;BolC07g048690.2J;BolC07g058440.2J;BolC08g001810.2J;BolC08g0…	K00901+K22389+K00655+K00981+K01613+K00550+K01115+K06123+K13511+K06123+K00655+K00968+K16818+K01613+K01114+K00630+K00993+K16818+K00967+K00967+K00655+K01115+K01613+K00967+K00993+K00993+K00981+K08744+K01126+K14156+K01114+K01126+K14674+K06130	Up
Stilbenoid, diarylheptanoid and gingerol biosynthesis	ko00945	6	72	1752	19416	BolC01g020840.2J;BolC01g026220.2J;BolC02g056730.2J;BolC04g056700.2J;BolC05g029600.2J;BolC09g013550.2J	K00588+K13065+K13065+K00487+K13065+K13065	Up
Glycosphingolipid biosynthesis - globo and isoglobo series	ko00603	2	23	1752	19416	BolC02g052390.2J;BolC03g076660.2J	K07407+K01988	Up
Carbon metabolism	ko01200	63	784	1752	19416	BolC01g001280.2J;BolC01g001510.2J;BolC01g003780.2J;BolC01g003790.2J;BolC01g012240.2J;BolC01g025950.2J;BolC01g025970.2J;BolC01g032630.2J;BolC02g001040.2J;BolC02g003000.2J;BolC02g048570.2J;BolC02g063610.2J;BolC03g005380.2J;BolC03g006440.2J;BolC03g006680.2J;BolC03g014490.2J;BolC03g037400.2J;BolC03g075250.2J;BolC04g011620.2J;BolC04g011650.2J;BolC04g015370.2J;BolC04g016100.2J;BolC04g016130.2J;BolC04g0…	K01610+K01455+K03781+K03781+K01595+K01006+K01006+K01895+K00030+K00261+K00626+K05605+K14454+K00616+K01689+K00873+K01738+K01681+K00927+K00927+K00850+K03841+K03841+K00161+K03781+K00232+K00927+K01623+K15919+K01595+K00863+K01595+K00850+K01595+K00161+K01913+K03781+K00626+K01895+K00850+K11517+K00600+K00814+K00814+K03781+K00232+K01754+K01647+K15919+K00616+K00031+K00232+K14454+K00033+K01810+K00626+K00261+…	Up
Lysine degradation	ko00310	19	103	1752	19416	BolC01g003040.2J;BolC01g005460.2J;BolC01g026330.2J;BolC02g025150.2J;BolC02g048570.2J;BolC03g006730.2J;BolC03g085520.2J;BolC04g059170.2J;BolC06g016280.2J;BolC06g026660.2J;BolC06g032540.2J;BolC06g044530.2J;BolC07g037360.2J;BolC07g053560.2J;BolC08g031420.2J;BolC08g038030.2J;BolC09g022770.2J;BolC09g027020.2J;BolC09g040350.2J	K18826+K14157+K22748+K18826+K00626+K11420+K14085+K11420+K22748+K11422+K11420+K11420+K00626+K11422+K00128+K11420+K11422+K00626+K11422	Up
Glycine, serine and threonine metabolism	ko00260	17	209	1752	19416	BolC02g039920.2J;BolC03g023030.2J;BolC03g085200.2J;BolC03g085520.2J;BolC04g065780.2J;BolC04g067560.2J;BolC05g006480.2J;BolC06g031260.2J;BolC07g022190.2J;BolC07g054900.2J;BolC08g009930.2J;BolC08g019970.2J;BolC08g020030.2J;BolC08g037720.2J;BolC08g054640.2J;BolC09g003110.2J;BolC09g036830.2J	K00276+K00827+K00276+K14085+K00276+K15919+K01620+K00130+K00276+K00499+K00600+K01620+K01620+K01754+K15919+K00276+K00133	Up
Protein export	ko03060	14	197	1752	19416	BolC02g021590.2J;BolC03g004520.2J;BolC03g056260.2J;BolC03g058050.2J;BolC05g020000.2J;BolC05g024520.2J;BolC05g028090.2J;BolC05g028120.2J;BolC06g036420.2J;BolC06g051260.2J;BolC08g004710.2J;BolC08g016680.2J;BolC08g022220.2J;BolC09g061640.2J	K03217+K10956+K03100+K09648+K03070+K03217+K03217+K03217+K03108+K09540+K03106+K03217+K09648+K09647	Up
Pyrimidine metabolism	ko00240	16	169	1752	19416	BolC01g010710.2J;BolC01g021200.2J;BolC01g055720.2J;BolC02g030660.2J;BolC02g052920.2J;BolC03g014100.2J;BolC03g086590.2J;BolC04g002180.2J;BolC05g027820.2J;BolC05g053430.2J;BolC05g056500.2J;BolC07g013950.2J;BolC07g014940.2J;BolC08g041750.2J;BolC09g048590.2J;BolC09g057710.2J	K01510+K00876+K14641+K00876+K10808+K14641+K00876+K01513+K00943+K14641+K09903+K10808+K01937+K10807+K00943+K00943	Up
Tyrosine metabolism	ko00350	14	116	1752	19416	BolC02g018460.2J;BolC02g018560.2J;BolC02g039920.2J;BolC03g005380.2J;BolC03g085200.2J;BolC04g065780.2J;BolC05g004680.2J;BolC06g007950.2J;BolC07g022190.2J;BolC08g058130.2J;BolC09g003110.2J;BolC09g014750.2J;BolC09g041130.2J;Brassica_oleracea_newGene_4598	K00451+K00815+K00276+K14454+K00276+K00276+K00457+K01557+K00276+K00457+K00276+K14454+K00451+K18857	Up
Nucleotide excision repair	ko03420	30	561	1752	19416	BolC01g010250.2J;BolC02g007640.2J;BolC02g010680.2J;BolC02g025910.2J;BolC02g026460.2J;BolC02g031070.2J;BolC02g042360.2J;BolC03g011210.2J;BolC03g055170.2J;BolC03g062580.2J;BolC04g015210.2J;BolC04g028740.2J;BolC04g046740.2J;BolC04g046880.2J;BolC04g051250.2J;BolC04g058410.2J;BolC05g022210.2J;BolC05g025380.2J;BolC05g043390.2J;BolC06g003540.2J;BolC06g048740.2J;BolC07g028380.2J;BolC07g035730.2J;BolC07g0…	K02202+K10838+K03868+K03141+K07466+K07466+K02328+K10754+K07466+K07466+K07466+K07466+K10848+K10843+K07466+K07466+K03505+K10570+K02335+K07466+K10754+K07466+K10846+K10841+K03142+K03143+K10747+K10610+K07466+K07466	Up
Linoleic acid metabolism	ko00591	2	96	1752	19416	BolC08g033850.2J;BolC09g067930.2J	K15718+K14674	Up
Terpenoid backbone biosynthesis	ko00900	11	114	1752	19416	BolC01g023970.2J;BolC02g048570.2J;BolC03g056960.2J;BolC07g037360.2J;BolC07g046790.2J;BolC08g038130.2J;BolC09g027020.2J;BolC09g043730.2J;BolC09g047200.2J;BolC09g061350.2J;Brassica_oleracea_newGene_8962	K00787+K00626+K05906+K00626+K00787+K01597+K00626+K00787+K15892+K01662+K13789	Up
Diterpenoid biosynthesis	ko00904	9	172	1752	19416	BolC04g015400.2J;BolC04g016650.2J;BolC07g015570.2J;BolC09g002170.2J;Brassica_oleracea_newGene_3500;Brassica_oleracea_newGene_6164;Brassica_oleracea_newGene_692;Brassica_oleracea_newGene_7350;Brassica_oleracea_newGene_7942	K04125+K04123+K04125+K04120+K04125+K04125+K04125+K04122+K04125	Up
Photosynthesis	ko00195	9	247	1752	19416	BolC01g026900.2J;BolC04g019080.2J;BolC04g019090.2J;BolC05g030860.2J;BolC05g057860.2J;BolC07g006900.2J;Brassica_oleracea_newGene_2928;Brassica_oleracea_newGene_4238;Brassica_oleracea_newGene_818	K02111+K02717+K02717+K02639+K02634+K02111+K02111+K02111+K02111	Up
Glycosylphosphatidylinositol (GPI)-anchor biosynthesis	ko00563	5	70	1752	19416	BolC04g060390.2J;BolC05g013660.2J;BolC08g048410.2J;BolC08g052150.2J;Brassica_oleracea_newGene_5090	K03859+K05287+K05310+K05287+K03434	Up
Thiamine metabolism	ko00730	7	46	1752	19416	BolC01g010570.2J;BolC03g054400.2J;BolC04g008750.2J;BolC05g001470.2J;BolC06g038560.2J;BolC06g038570.2J;BolC09g061350.2J	K22911+K04487+K00939+K00949+K06949+K06949+K01662	Up
Taurine and hypotaurine metabolism	ko00430	1	37	1752	19416	BolC01g009990.2J	K18592	Up
Inositol phosphate metabolism	ko00562	31	240	1752	19416	BolC01g004980.2J;BolC01g037410.2J;BolC01g047610.2J;BolC01g053340.2J;BolC01g057580.2J;BolC02g001980.2J;BolC02g002140.2J;BolC02g014070.2J;BolC02g034040.2J;BolC02g055130.2J;BolC02g061960.2J;BolC03g001910.2J;BolC03g002180.2J;BolC03g035810.2J;BolC03g056750.2J;BolC03g078090.2J;BolC05g005180.2J;BolC05g023640.2J;BolC05g033840.2J;BolC05g037070.2J;BolC05g057550.2J;BolC06g036980.2J;BolC06g043090.2J;BolC07g0…	K00913+K00921+K00921+K05857+K05857+K18081+K24221+K05857+K00889+K00889+K19801+K18081+K24221+K05857+K19801+K00889+K01114+K13711+K00888+K24221+K05857+K01099+K20279+K00469+K05857+K22913+K22913+K00469+K01114+K18081+K00469	Up
Sesquiterpenoid and triterpenoid biosynthesis	ko00909	1	85	1752	19416	BolC07g041990.2J	K00511	Up
Indole alkaloid biosynthesis	ko00901	1	30	1752	19416	BolC08g042890.2J	K01757	Up
Glycolysis / Gluconeogenesis	ko00010	33	342	1752	19416	BolC01g001280.2J;BolC01g025950.2J;BolC01g025970.2J;BolC01g032630.2J;BolC02g008200.2J;BolC03g006680.2J;BolC03g014490.2J;BolC03g067450.2J;BolC03g085520.2J;BolC04g010560.2J;BolC04g011620.2J;BolC04g011650.2J;BolC04g012570.2J;BolC04g015370.2J;BolC04g016100.2J;BolC04g016130.2J;BolC04g017470.2J;BolC04g054650.2J;BolC04g061760.2J;BolC05g048000.2J;BolC06g008280.2J;BolC06g038300.2J;BolC06g048050.2J;BolC07g0…	K01610+K01006+K01006+K01895+K01835+K01689+K00873+K01785+K14085+K00002+K00927+K00927+K00002+K00850+K03841+K03841+K00161+K00927+K01623+K01785+K00850+K00161+K00895+K01913+K01895+K00850+K00128+K01810+K00895+K01689+K00850+K18857+K01610	Up
Arginine biosynthesis	ko00220	9	108	1752	19416	BolC02g003000.2J;BolC03g005380.2J;BolC05g048210.2J;BolC08g026300.2J;BolC08g026350.2J;BolC09g014750.2J;BolC09g033000.2J;BolC09g055090.2J;Brassica_oleracea_newGene_4103	K00261+K14454+K01915+K00814+K00814+K14454+K13427+K00261+K00262	Up
Zeatin biosynthesis	ko00908	12	92	1752	19416	BolC01g031740.2J;BolC03g021670.2J;BolC03g066120.2J;BolC04g011820.2J;BolC04g011830.2J;BolC04g011840.2J;BolC04g061850.2J;BolC07g020870.2J;BolC07g020880.2J;BolC07g020890.2J;BolC09g066130.2J;BolC09g066140.2J	K13493+K13496+K13493+K13496+K13496+K13496+K13496+K23452+K23452+K23452+K13493+K13493	Up
SNARE interactions in vesicular transport	ko04130	11	107	1752	19416	BolC01g006930.2J;BolC02g003240.2J;BolC03g020490.2J;BolC05g006430.2J;BolC05g030580.2J;BolC07g019080.2J;BolC07g029450.2J;BolC07g047140.2J;BolC08g025770.2J;BolC08g056650.2J;BolC09g061580.2J	K08515+K08486+K08486+K08486+K08488+K08493+K08488+K08488+K08495+K08486+K08515	Up
Biotin metabolism	ko00780	8	53	1752	19416	BolC01g055840.2J;BolC01g055880.2J;BolC01g055910.2J;BolC01g055950.2J;BolC05g055170.2J;BolC05g061440.2J;BolC09g025780.2J;BolC09g046140.2J	K00059+K00059+K00059+K00059+K00059+K00059+K09458+K19562	Up
Peroxisome	ko04146	34	276	1752	19416	BolC01g003780.2J;BolC01g003790.2J;BolC01g003930.2J;BolC02g037720.2J;BolC03g001740.2J;BolC03g016420.2J;BolC03g019710.2J;BolC03g039050.2J;BolC03g078000.2J;BolC04g015130.2J;BolC04g016040.2J;BolC04g023780.2J;BolC04g031180.2J;BolC04g040480.2J;BolC04g040750.2J;BolC05g010900.2J;BolC05g032430.2J;BolC05g034870.2J;BolC05g053890.2J;BolC05g054690.2J;BolC05g058170.2J;BolC07g022200.2J;BolC07g047730.2J;BolC08g0…	K03781+K03781+K00106+K00106+K13343+K08726+K07513+K13344+K11147+K17879+K07513+K01897+K03781+K00232+K13347+K01640+K00106+K13352+K13237+K13356+K13344+K03781+K11517+K07513+K03781+K00232+K00031+K13343+K00232+K04564+K08726+K13337+K12261+K13338	Up
Endocytosis	ko04144	48	615	1752	19416	BolC01g003310.2J;BolC01g013870.2J;BolC01g031880.2J;BolC02g027200.2J;BolC02g032290.2J;BolC02g034040.2J;BolC02g039500.2J;BolC02g039550.2J;BolC02g055130.2J;BolC02g058510.2J;BolC03g002850.2J;BolC03g003260.2J;BolC03g024230.2J;BolC03g041810.2J;BolC03g051700.2J;BolC03g065950.2J;BolC03g077310.2J;BolC03g078090.2J;BolC04g019000.2J;BolC04g025260.2J;BolC04g040400.2J;BolC04g055720.2J;BolC04g063350.2J;BolC05g0…	K19476+K12191+K03283+K07904+K18468+K00889+K10591+K10591+K00889+K01115+K03283+K17917+K04645+K12183+K12189+K03283+K12184+K00889+K04646+K03283+K04645+K03283+K12183+K07901+K19476+K07897+K07937+K18468+K12189+K17917+K07904+K12486+K01115+K12486+K03283+K12198+K12194+K10591+K17917+K12489+K12489+K17917+K17917+K12190+K01528+K03283+K12486+K12198	Up
Propanoate metabolism	ko00640	12	126	1752	19416	BolC01g032630.2J;BolC02g048570.2J;BolC02g063610.2J;BolC03g038620.2J;BolC03g086240.2J;BolC04g040480.2J;BolC05g019730.2J;BolC07g037360.2J;BolC07g042870.2J;BolC08g036070.2J;BolC09g009570.2J;BolC09g027020.2J	K01895+K00626+K05605+K09699+K00167+K00232+K00166+K00626+K01895+K00232+K00232+K00626	Up
Ubiquitin mediated proteolysis	ko04120	71	483	1752	19416	BolC01g005360.2J;BolC01g025330.2J;BolC01g035640.2J;BolC01g045860.2J;BolC02g005260.2J;BolC02g010680.2J;BolC02g032340.2J;BolC02g034560.2J;BolC02g039500.2J;BolC02g039550.2J;BolC02g050590.2J;BolC02g058400.2J;BolC02g061110.2J;BolC03g006660.2J;BolC03g010150.2J;BolC03g011670.2J;BolC03g025450.2J;BolC03g034310.2J;BolC03g038250.2J;BolC03g050380.2J;BolC03g050980.2J;BolC03g054110.2J;BolC03g057070.2J;BolC03g0…	K03363+K10578+K10260+K10578+K10614+K03868+K03094+K06689+K10591+K10591+K10573+K10144+K10573+K03364+K10686+K10144+K04506+K03347+K04506+K04506+K08770+K10598+K10615+K10581+K04506+K03178+K10685+K04506+K10260+K04506+K03094+K10615+K10570+K10604+K09561+K04506+K04506+K10615+K10688+K10581+K03354+K04706+K04506+K04506+K03875+K10581+K10260+K10260+K10573+K10614+K04506+K10684+K04706+K03869+K04506+K10685+K04706+…	Up
Oxidative phosphorylation	ko00190	32	573	1752	19416	BolC01g012330.2J;BolC01g026900.2J;BolC01g038950.2J;BolC02g003430.2J;BolC02g015340.2J;BolC02g033290.2J;BolC02g058490.2J;BolC03g004040.2J;BolC03g043910.2J;BolC03g054170.2J;BolC03g055650.2J;BolC03g079330.2J;BolC03g082360.2J;BolC04g025150.2J;BolC04g038580.2J;BolC04g067000.2J;BolC05g021170.2J;BolC05g022700.2J;BolC05g036510.2J;BolC05g050480.2J;BolC07g003170.2J;BolC07g006900.2J;BolC07g045540.2J;BolC08g0…	K02155+K02111+K05573+K03942+K01535+K01535+K00417+K03942+K02265+K03937+K01535+K03884+K01535+K03884+K01507+K02257+K01535+K03942+K03884+K02265+K01535+K02111+K02155+K02146+K01535+K02154+K02128+K02111+K01535+K03953+K02111+K02111	Up
MAPK signaling pathway - plant	ko04016	86	1141	1752	19416	BolC01g003780.2J;BolC01g003790.2J;BolC01g018520.2J;BolC01g020650.2J;BolC01g025080.2J;BolC01g038140.2J;BolC01g038640.2J;BolC01g049390.2J;BolC01g051280.2J;BolC01g051360.2J;BolC01g052780.2J;BolC01g054550.2J;BolC02g015510.2J;BolC02g025920.2J;BolC03g002370.2J;BolC03g013730.2J;BolC03g015660.2J;BolC03g016360.2J;BolC03g017120.2J;BolC03g018020.2J;BolC03g019480.2J;BolC03g026650.2J;BolC03g034380.2J;BolC03g0…	K03781+K03781+K13425+K14497+K13422+K20558+K20551+K20606+K14497+K14497+K13420+K16224+K13422+K13416+K14496+K14510+K16224+K14496+K13416+K13423+K13416+K14512+K13414+K13414+K14496+K13425+K20606+K20558+K13425+K13423+K17686+K17686+K03781+K02183+K20557+K13423+K13425+K13420+K14497+K14509+K14497+K14496+K13416+K20557+K14497+K20606+K20718+K13416+K20727+K14509+K02183+K13416+K14497+K03781+K14498+K20728+K20728+…	Up
Autophagy - other	ko04136	13	101	1752	19416	BolC01g008300.2J;BolC01g009800.2J;BolC01g044190.2J;BolC02g039120.2J;BolC02g046180.2J;BolC03g066880.2J;BolC05g045410.2J;BolC06g004530.2J;BolC07g055350.2J;BolC07g055590.2J;BolC08g045070.2J;BolC09g020560.2J;BolC09g036260.2J	K08330+K08333+K08331+K08341+K08337+K08343+K17906+K07203+K17908+K08330+K08269+K04382+K17890	Up
Pyruvate metabolism	ko00620	23	298	1752	19416	BolC01g001280.2J;BolC01g012240.2J;BolC01g025950.2J;BolC01g025970.2J;BolC01g032630.2J;BolC02g048570.2J;BolC03g001330.2J;BolC03g014490.2J;BolC03g085520.2J;BolC04g017470.2J;BolC05g006310.2J;BolC05g023740.2J;BolC06g004090.2J;BolC06g022400.2J;BolC06g038300.2J;BolC07g005250.2J;BolC07g037360.2J;BolC07g042870.2J;BolC08g031420.2J;BolC08g058340.2J;BolC09g027020.2J;Brassica_oleracea_newGene_6192;Brassica_ol…	K01610+K01595+K01006+K01006+K01895+K00626+K01512+K00873+K14085+K00161+K01759+K01595+K01595+K01595+K00161+K01913+K00626+K01895+K00128+K01069+K00626+K00026+K01610	Up
Various types of N-glycan biosynthesis	ko00513	5	95	1752	19416	BolC02g009960.2J;BolC03g015090.2J;BolC03g083760.2J;BolC05g014490.2J;BolC06g004150.2J	K07151+K03714+K01230+K03846+K00753	Up
Fructose and mannose metabolism	ko00051	19	179	1752	19416	BolC01g020190.2J;BolC02g015040.2J;BolC02g055270.2J;BolC04g015370.2J;BolC04g016100.2J;BolC04g016130.2J;BolC04g018340.2J;BolC04g061760.2J;BolC04g063870.2J;BolC05g048270.2J;BolC06g008280.2J;BolC06g025090.2J;BolC06g048050.2J;BolC07g043670.2J;BolC08g049670.2J;BolC09g037370.2J;BolC09g043160.2J;BolC09g046200.2J;BolCnng006370.2J	K01805+K01805+K00847+K00850+K03841+K03841+K00847+K01623+K00966+K00863+K00850+K00847+K00895+K00850+K19355+K01805+K00895+K01805+K00850	Up
Glyoxylate and dicarboxylate metabolism	ko00630	25	354	1752	19416	BolC01g001510.2J;BolC01g003780.2J;BolC01g003790.2J;BolC01g032630.2J;BolC02g016760.2J;BolC02g048570.2J;BolC03g075250.2J;BolC04g031180.2J;BolC04g033010.2J;BolC04g065040.2J;BolC04g067560.2J;BolC05g048210.2J;BolC07g005250.2J;BolC07g022200.2J;BolC07g037360.2J;BolC07g042870.2J;BolC07g047730.2J;BolC08g009930.2J;BolC08g028740.2J;BolC08g033090.2J;BolC08g042480.2J;BolC08g054640.2J;BolC09g027020.2J;BolC09g0…	K01455+K03781+K03781+K01895+K22133+K00626+K01681+K03781+K22133+K00284+K15919+K01915+K01913+K03781+K00626+K01895+K11517+K00600+K03781+K22133+K01647+K15919+K00626+K00122+K00026	Up
Mismatch repair	ko03430	19	513	1752	19416	BolC01g044350.2J;BolC02g026460.2J;BolC02g031070.2J;BolC02g042360.2J;BolC03g011210.2J;BolC03g026980.2J;BolC03g055170.2J;BolC03g062580.2J;BolC04g015210.2J;BolC04g028740.2J;BolC04g051250.2J;BolC04g058410.2J;BolC05g022210.2J;BolC06g003540.2J;BolC06g048740.2J;BolC07g028380.2J;BolC08g057260.2J;BolC09g040420.2J;BolC09g054190.2J	K03111+K07466+K07466+K02328+K10754+K08737+K07466+K07466+K07466+K07466+K07466+K07466+K03505+K07466+K10754+K07466+K10747+K07466+K07466	Up
Phosphonate and phosphinate metabolism	ko00440	7	34	1752	19416	BolC04g016790.2J;BolC05g045960.2J;BolC07g038840.2J;BolC07g038880.2J;BolC08g011590.2J;BolC08g053890.2J;BolC08g053940.2J	K00968+K00993+K00967+K00967+K00967+K00993+K00993	Up
Fatty acid elongation	ko00062	6	75	1752	19416	BolC01g025070.2J;BolC02g036770.2J;BolC03g035400.2J;BolC05g000310.2J;BolC06g025470.2J;BolC07g045100.2J	K15397+K01068+K01068+K01068+K01074+K15397	Up
Plant hormone signal transduction	ko04075	138	1153	1752	19416	BolC01g002210.2J;BolC01g004840.2J;BolC01g010580.2J;BolC01g018270.2J;BolC01g020650.2J;BolC01g020720.2J;BolC01g025080.2J;BolC01g026980.2J;BolC01g039640.2J;BolC01g050600.2J;BolC01g051280.2J;BolC01g051360.2J;BolC01g055320.2J;BolC02g010950.2J;BolC02g015510.2J;BolC02g025920.2J;BolC02g049640.2J;BolC02g062640.2J;BolC03g002370.2J;BolC03g002900.2J;BolC03g006430.2J;BolC03g013730.2J;BolC03g016360.2J;BolC03g0…	K14503+K14432+K14484+K14494+K14497+K14508+K13422+K13464+K14484+K14431+K14497+K14497+K14484+K13464+K13422+K13416+K14491+K14431+K14496+K14493+K14487+K14510+K14496+K13416+K13416+K13463+K16189+K14512+K14506+K14485+K14496+K13415+K14484+K16189+K14484+K14489+K14486+K14491+K14486+K14500+K14484+K13463+K14486+K14485+K14488+K14508+K16189+K14500+K14487+K14497+K14509+K14497+K14488+K14494+K14496+K14431+K13415+…	Up
Cysteine and methionine metabolism	ko00270	23	354	1752	19416	BolC01g056270.2J;BolC02g000860.2J;BolC02g018560.2J;BolC02g018730.2J;BolC02g036160.2J;BolC02g038590.2J;BolC03g005380.2J;BolC03g023030.2J;BolC03g032350.2J;BolC03g037400.2J;BolC04g030070.2J;BolC05g003120.2J;BolC06g026890.2J;BolC06g044070.2J;BolC08g006370.2J;BolC08g021600.2J;BolC08g031430.2J;BolC09g005320.2J;BolC09g005450.2J;BolC09g014750.2J;BolC09g036830.2J;Brassica_oleracea_newGene_2752;Brassica_ol…	K22846+K17398+K00815+K16054+K00837+K05933+K14454+K00827+K00558+K01738+K00547+K05933+K22207+K00789+K01919+K00826+K00797+K21456+K17398+K14454+K00133+K01611+K00026	Up
Sphingolipid metabolism	ko00600	24	179	1752	19416	BolC01g030080.2J;BolC01g048990.2J;BolC02g015850.2J;BolC02g052390.2J;BolC02g059740.2J;BolC02g061800.2J;BolC02g063380.2J;BolC03g014110.2J;BolC03g028880.2J;BolC03g077320.2J;BolC04g039680.2J;BolC05g011750.2J;BolC05g052870.2J;BolC06g011920.2J;BolC06g041040.2J;BolC07g032130.2J;BolC07g042530.2J;BolC08g025070.2J;BolC08g034830.2J;BolC08g038280.2J;BolC09g027680.2J;BolC09g027690.2J;Brassica_oleracea_newGene…	K00654+K12309+K12309+K07407+K04718+K12309+K12309+K12309+K12309+K04718+K12309+K04713+K12309+K17108+K04713+K12309+K04718+K04713+K12309+K01190+K12309+K12309+K12309+K12349	Up
N-Glycan biosynthesis	ko00510	7	135	1752	19416	BolC02g009960.2J;BolC03g007140.2J;BolC03g083760.2J;BolC05g014490.2J;BolC09g011430.2J;BolC09g058680.2J;BolC09g064390.2J	K07151+K00737+K01230+K03846+K00737+K00737+K00729	Up
Ubiquinone and other terpenoid-quinone biosynthesis	ko00130	13	114	1752	19416	BolC01g047410.2J;BolC02g013990.2J;BolC02g018560.2J;BolC04g056700.2J;BolC05g004680.2J;BolC05g050660.2J;BolC07g050790.2J;BolC08g015240.2J;BolC08g027330.2J;BolC08g058130.2J;BolC09g029470.2J;Brassica_oleracea_newGene_790;Brassica_oleracea_newGene_9968	K23095+K03809+K00815+K00487+K00457+K23095+K06125+K02552+K02552+K00457+K01904+K03809+K02552	Up
Base excision repair	ko03410	13	116	1752	19416	BolC01g003000.2J;BolC01g004810.2J;BolC01g044320.2J;BolC02g042360.2J;BolC03g025130.2J;BolC05g017130.2J;BolC05g022210.2J;BolC05g043390.2J;BolC08g022060.2J;BolC08g035180.2J;BolC08g053690.2J;BolC08g057260.2J;Brassica_oleracea_newGene_4428	K10772+K10773+K03648+K02328+K01142+K01247+K03505+K02335+K03512+K01247+K03648+K10747+K03575	Up
Glutathione metabolism	ko00480	24	247	1752	19416	BolC01g009990.2J;BolC01g046420.2J;BolC02g031110.2J;BolC02g052920.2J;BolC03g000460.2J;BolC03g046440.2J;BolC03g048910.2J;BolC04g030200.2J;BolC04g037610.2J;BolC04g051450.2J;BolC06g017500.2J;BolC07g013200.2J;BolC07g013950.2J;BolC07g042590.2J;BolC08g006370.2J;BolC08g031430.2J;BolC08g041750.2J;BolC09g001960.2J;BolC09g001970.2J;BolC09g005320.2J;BolC09g016010.2J;BolC09g020750.2J;BolC09g031890.2J;Brassica…	K18592+K01255+K00799+K10808+K00799+K21888+K00383+K00432+K00383+K01255+K01469+K00383+K10808+K00434+K01919+K00797+K10807+K00031+K00799+K21456+K00033+K00799+K00432+K00799	Up
Riboflavin metabolism	ko00740	3	53	1752	19416	BolC02g001140.2J;BolC04g002180.2J;BolC08g048540.2J	K00953+K01513+K14652	Up
Phenylalanine, tyrosine and tryptophan biosynthesis	ko00400	9	140	1752	19416	BolC01g000950.2J;BolC01g005160.2J;BolC02g018560.2J;BolC03g005380.2J;BolC03g026760.2J;BolC03g039100.2J;BolC06g040660.2J;BolC09g003990.2J;BolC09g014750.2J	K01626+K01626+K00815+K14454+K15227+K05359+K01850+K01850+K14454	Up
Other types of O-glycan biosynthesis	ko00514	1	33	1752	19416	BolC03g040990.2J	K09667	Up
Vitamin B6 metabolism	ko00750	3	27	1752	19416	BolC01g009650.2J;BolC01g046750.2J;BolC04g068050.2J	K13248+K06215+K00275	Up
Glucosinolate biosynthesis	ko00966	21	137	2614	19416	BolC01g000930.2J;BolC02g006120.2J;BolC02g030760.2J;BolC02g059950.2J;BolC03g046400.2J;BolC03g073270.2J;BolC04g004590.2J;BolC04g041440.2J;BolC05g007900.2J;BolC05g022270.2J;BolC05g044530.2J;BolC06g033020.2J;BolC06g045540.2J;BolC07g000300.2J;BolC07g000320.2J;BolC07g042920.2J;BolC07g059740.2J;BolC08g008400.2J;BolC08g033700.2J;BolC09g021310.2J;BolC09g021320.2J	K11812+K21360+K11821+K15741+K21346+K11812+K21359+K12156+K00826+K11820+K21346+K11821+K11821+K11819+K11819+K15741+K11812+K01703+K00826+K22321+K22321	Down
Circadian rhythm - plant	ko04712	42	227	2614	19416	BolC01g045270.2J;BolC01g047570.2J;BolC01g052710.2J;BolC02g003350.2J;BolC02g004670.2J;BolC02g004740.2J;BolC02g006000.2J;BolC02g008010.2J;BolC02g058470.2J;BolC02g061010.2J;BolC03g000110.2J;BolC03g001100.2J;BolC03g003910.2J;BolC03g006710.2J;BolC03g027850.2J;BolC03g029760.2J;BolC03g035520.2J;BolC03g036190.2J;BolC03g045050.2J;BolC04g001800.2J;BolC04g006160.2J;BolC04g016280.2J;BolC04g044940.2J;BolC05g0…	K16241+K16240+K12133+K16221+K16241+K03097+K00660+K12133+K03097+K16222+K12133+K12133+K16221+K00660+K16240+K12126+K12126+K12135+K16241+K12134+K03115+K10143+K16222+K12133+K12133+K12126+K12119+K16240+K12133+K03097+K12126+K16221+K16222+K03097+K10143+K16221+K12131+K12133+K12135+K00660+K16241+K16221	Down
2-Oxocarboxylic acid metabolism	ko01210	41	293	2614	19416	BolC01g000930.2J;BolC01g001450.2J;BolC01g003640.2J;BolC01g007040.2J;BolC02g006120.2J;BolC02g009850.2J;BolC02g017330.2J;BolC02g030760.2J;BolC02g035950.2J;BolC02g035990.2J;BolC02g059950.2J;BolC03g006860.2J;BolC03g046400.2J;BolC03g050490.2J;BolC03g073270.2J;BolC04g004590.2J;BolC04g041440.2J;BolC04g058040.2J;BolC04g062380.2J;BolC05g007900.2J;BolC05g021660.2J;BolC05g022270.2J;BolC05g044530.2J;BolC06g0…	K11812+K14682+K00030+K00811+K21360+K14454+K00928+K11821+K00818+K00052+K15741+K00928+K21346+K01681+K11812+K21359+K12156+K01653+K00620+K00826+K14272+K11820+K21346+K00053+K00053+K00053+K01647+K11821+K14272+K11821+K11819+K11819+K01687+K14272+K15741+K11812+K01703+K00133+K00826+K00053+K00145	Down
beta-Alanine metabolism	ko00410	15	167	2614	19416	BolC01g002580.2J;BolC01g004630.2J;BolC02g063530.2J;BolC03g006580.2J;BolC03g008920.2J;BolC03g056940.2J;BolC03g061260.2J;BolC03g074650.2J;BolC03g075060.2J;BolC04g041750.2J;BolC05g007100.2J;BolC07g058560.2J;BolC07g058670.2J;BolC08g056630.2J;BolC09g055950.2J	K00128+K00128+K00276+K13366+K01580+K01578+K00128+K00128+K00128+K05605+K05605+K00276+K00128+K05605+K01580	Down
Glycosphingolipid biosynthesis - globo and isoglobo series	ko00603	4	23	2614	19416	BolC03g003950.2J;BolC03g003960.2J;BolC06g037000.2J;BolC08g058620.2J	K07407+K07407+K12373+K12373	Down
Diterpenoid biosynthesis	ko00904	2	172	2614	19416	BolC04g001260.2J;BolC05g001160.2J	K13070+K04125	Down
Inositol phosphate metabolism	ko00562	49	240	2614	19416	BolC01g000820.2J;BolC01g011490.2J;BolC01g030270.2J;BolC01g048500.2J;BolC02g010900.2J;BolC02g014060.2J;BolC02g014090.2J;BolC02g023990.2J;BolC02g037070.2J;BolC02g048430.2J;BolC02g061910.2J;BolC03g008520.2J;BolC03g035180.2J;BolC03g046260.2J;BolC03g056840.2J;BolC03g056860.2J;BolC03g072440.2J;BolC03g073390.2J;BolC04g001810.2J;BolC04g036010.2J;BolC04g036600.2J;BolC04g048600.2J;BolC04g049400.2J;BolC04g0…	K01858+K01092+K01114+K00921+K22913+K05857+K05857+K00999+K01092+K10047+K15422+K00913+K01092+K01110+K15422+K15422+K18649+K01092+K01092+K18081+K01803+K01803+K01858+K01114+K00921+K01092+K22913+K00889+K10047+K20279+K20279+K00921+K18081+K20279+K20279+K10572+K10047+K21797+K01803+K18081+K01858+K01803+K03103+K10572+K05857+K05857+K10047+K18081+K00915	Down
Other types of O-glycan biosynthesis	ko00514	6	33	2614	19416	BolC02g058620.2J;BolC03g035660.2J;BolC04g003290.2J;BolC04g060730.2J;BolC05g012800.2J;BolC08g025470.2J	K20782+K20781+K18134+K20784+K20784+K20784	Down
Sulfur metabolism	ko00920	32	90	2614	19416	BolC01g000920.2J;BolC01g026690.2J;BolC01g027020.2J;BolC01g052150.2J;BolC02g061910.2J;BolC03g040300.2J;BolC03g048340.2J;BolC03g051190.2J;BolC03g053230.2J;BolC03g056840.2J;BolC03g056860.2J;BolC03g086700.2J;BolC04g005060.2J;BolC04g031550.2J;BolC04g032950.2J;BolC04g041070.2J;BolC04g066600.2J;BolC05g014030.2J;BolC05g017810.2J;BolC05g039450.2J;BolC05g060700.2J;BolC05g062440.2J;BolC06g028640.2J;BolC07g0…	K00860+K01738+K13811+K00392+K15422+K00392+K13811+K00860+K00640+K15422+K15422+K00640+K01738+K13034+K01738+K17285+K01738+K01011+K13811+K13811+K01738+K01739+K01011+K00860+K00860+K17285+K01738+K13811+K13034+K01738+K00860+K00392	Down
Folate biosynthesis	ko00790	16	62	2614	19416	BolC01g004210.2J;BolC01g050940.2J;BolC01g052470.2J;BolC01g053860.2J;BolC03g013590.2J;BolC03g017450.2J;BolC03g056520.2J;BolC03g078430.2J;BolC04g021330.2J;BolC05g027350.2J;BolC05g054910.2J;BolC06g049550.2J;BolC08g039670.2J;BolC08g058400.2J;BolC09g033530.2J;Brassica_oleracea_newGene_9275	K13998+K01633+K01930+K01495+K18482+K01724+K14652+K15631+K13950+K01724+K01633+K01307+K01930+K15376+K15631+K15376	Down
Glycosaminoglycan degradation	ko00531	11	79	2614	19416	BolC01g020740.2J;BolC01g032390.2J;BolC04g021840.2J;BolC04g058820.2J;BolC05g052790.2J;BolC06g001090.2J;BolC06g037000.2J;BolC06g039330.2J;BolC07g058720.2J;BolC08g058620.2J;BolC09g068630.2J	K12309+K12309+K12309+K12309+K12309+K12309+K12373+K12309+K12309+K12373+K12309	Down
Citrate cycle (TCA cycle)	ko00020	22	250	2614	19416	BolC01g003640.2J;BolC01g025400.2J;BolC02g003320.2J;BolC02g003780.2J;BolC02g021160.2J;BolC03g003890.2J;BolC03g042850.2J;BolC03g044650.2J;BolC03g050490.2J;BolC03g071210.2J;BolC06g002320.2J;BolC06g008240.2J;BolC06g014540.2J;BolC06g024620.2J;BolC06g041530.2J;BolC08g001070.2J;BolC08g060370.2J;BolC09g015620.2J;BolC09g019790.2J;BolC09g024810.2J;BolC09g063140.2J;Brassica_oleracea_newGene_3926	K00030+K00382+K01899+K00026+K00162+K01899+K00627+K00382+K01681+K00162+K00382+K00026+K00026+K01647+K00161+K00025+K00161+K01900+K01648+K00164+K00236+K00234	Down
Protein processing in endoplasmic reticulum	ko04141	65	701	2614	19416	BolC01g015530.2J;BolC01g015540.2J;BolC01g018660.2J;BolC01g023160.2J;BolC01g025540.2J;BolC01g034300.2J;BolC01g037500.2J;BolC01g044980.2J;BolC01g050320.2J;BolC01g052800.2J;BolC01g053240.2J;BolC02g016500.2J;BolC02g036470.2J;BolC02g049070.2J;BolC02g061030.2J;BolC03g005690.2J;BolC03g011100.2J;BolC03g016240.2J;BolC03g018540.2J;BolC03g046770.2J;BolC03g047110.2J;BolC03g057730.2J;BolC03g058670.2J;BolC03g0…	K03283+K14012+K03283+K06689+K10956+K03283+K12669+K13989+K03283+K03283+K06689+K06689+K08057+K10661+K10661+K13993+K12668+K06689+K09490+K03283+K12275+K08852+K10661+K13993+K09584+K03094+K14016+K10956+K01456+K03283+K10839+K09503+K03283+K12668+K10661+K14004+K09490+K06689+K10661+K09487+K14009+K01456+K13993+K03283+K10666+K07953+K08057+K01230+K09503+K09580+K08852+K13249+K10839+K08057+K01456+K03283+K06689+…	Down
Glycerophospholipid metabolism	ko00564	44	322	2614	19416	BolC01g008740.2J;BolC01g021510.2J;BolC01g026400.2J;BolC01g030270.2J;BolC01g047090.2J;BolC02g003190.2J;BolC02g008940.2J;BolC02g010280.2J;BolC02g023990.2J;BolC02g031360.2J;BolC02g061770.2J;BolC03g003670.2J;BolC03g010510.2J;BolC03g025200.2J;BolC03g027560.2J;BolC03g034690.2J;BolC03g057150.2J;BolC04g013660.2J;BolC04g034490.2J;BolC04g046120.2J;BolC04g053830.2J;BolC05g000180.2J;BolC05g010960.2J;BolC05g0…	K00901+K01126+K00968+K01114+K01115+K00901+K16818+K06130+K00999+K13513+K00901+K00901+K06130+K00006+K13510+K13508+K00901+K00655+K13523+K00006+K01114+K01115+K00993+K00993+K16818+K00630+K05929+K18693+K05929+K00006+K13523+K01094+K05929+K01126+K01047+K00901+K06129+K18693+K16818+K00630+K00981+K00968+K13508+K18693	Down
Glutathione metabolism	ko00480	48	247	2614	19416	BolC01g000670.2J;BolC01g008210.2J;BolC02g000350.2J;BolC02g007930.2J;BolC02g018170.2J;BolC03g006280.2J;BolC03g018460.2J;BolC03g018470.2J;BolC03g026330.2J;BolC03g028370.2J;BolC03g028600.2J;BolC03g031150.2J;BolC04g006220.2J;BolC04g017810.2J;BolC04g020580.2J;BolC04g022850.2J;BolC04g060030.2J;BolC05g008240.2J;BolC05g014850.2J;BolC05g017330.2J;BolC05g022730.2J;BolC05g062700.2J;BolC05g063320.2J;BolC06g0…	K18592+K01255+K00799+K00799+K00434+K00036+K00799+K00799+K00432+K00799+K00799+K00434+K01255+K00432+K00799+K00799+K01256+K00799+K00799+K21888+K00799+K00033+K00799+K22596+K00434+K00799+K00799+K00799+K00799+K00434+K00799+K00797+K10808+K00432+K00434+K00434+K00036+K21888+K00383+K00799+K01255+K00799+K00434+K01469+K00799+K00434+K10807+K00036	Down
Zeatin biosynthesis	ko00908	11	92	2614	19416	BolC02g015730.2J;BolC02g020170.2J;BolC03g012490.2J;BolC04g011870.2J;BolC04g012120.2J;BolC04g012240.2J;BolC06g022250.2J;BolC08g039710.2J;BolC08g046160.2J;BolC09g006980.2J;BolC09g058370.2J	K00279+K13496+K13493+K13496+K13496+K13496+K13493+K13493+K00279+K13496+K13496	Down
Pyruvate metabolism	ko00620	48	298	2614	19416	BolC01g002580.2J;BolC01g004630.2J;BolC01g025400.2J;BolC01g029710.2J;BolC02g003780.2J;BolC02g004910.2J;BolC02g014320.2J;BolC02g021160.2J;BolC03g004110.2J;BolC03g005440.2J;BolC03g008340.2J;BolC03g018810.2J;BolC03g022670.2J;BolC03g042850.2J;BolC03g044650.2J;BolC03g061260.2J;BolC03g071210.2J;BolC03g074650.2J;BolC03g075060.2J;BolC03g085030.2J;BolC04g018390.2J;BolC04g064400.2J;BolC04g067630.2J;BolC05g0…	K00128+K00128+K00382+K00873+K00026+K00029+K00051+K00162+K00873+K00029+K02160+K01069+K01962+K00627+K00382+K00128+K00162+K00128+K00128+K01595+K01069+K01595+K01759+K00873+K01913+K00382+K00026+K00026+K01595+K01595+K18881+K00029+K01759+K00161+K00029+K00016+K00128+K00025+K11262+K00873+K01961+K00161+K00028+K00028+K00873+K00873+K01759+K01595	Down
Butanoate metabolism	ko00650	11	71	2614	19416	BolC02g011080.2J;BolC02g040420.2J;BolC03g008920.2J;BolC03g029420.2J;BolC04g058040.2J;BolC05g015230.2J;BolC05g049410.2J;BolC07g011690.2J;BolC09g031620.2J;BolC09g051320.2J;BolC09g055950.2J	K00109+K01641+K01580+K01640+K01653+K18121+K01913+K18121+K01641+K00109+K01580	Down
Biotin metabolism	ko00780	9	53	2614	19416	BolC03g050600.2J;BolC03g068930.2J;BolC04g004840.2J;BolC04g049390.2J;BolC05g024630.2J;BolC06g046250.2J;BolC07g009450.2J;BolC07g017770.2J;BolC09g067400.2J	K00208+K00059+K01012+K02372+K00059+K09458+K00208+K00059+K00652	Down
Glycolysis / Gluconeogenesis	ko00010	84	342	2614	19416	BolC01g002020.2J;BolC01g002580.2J;BolC01g004630.2J;BolC01g009960.2J;BolC01g009980.2J;BolC01g015470.2J;BolC01g019030.2J;BolC01g019040.2J;BolC01g020340.2J;BolC01g021210.2J;BolC01g025400.2J;BolC01g028250.2J;BolC01g029710.2J;BolC01g044890.2J;BolC01g050130.2J;BolC01g055690.2J;BolC02g021160.2J;BolC02g032760.2J;BolC02g035330.2J;BolC03g004110.2J;BolC03g013840.2J;BolC03g021550.2J;BolC03g022350.2J;BolC03g0…	K01792+K00128+K00128+K00850+K00850+K00121+K01810+K01810+K01792+K01623+K00382+K15634+K00873+K01785+K00927+K00134+K00162+K15634+K00927+K00873+K01792+K01689+K00002+K01792+K00927+K00627+K00382+K00128+K00162+K01623+K00128+K00128+K00002+K01689+K01803+K03841+K01803+K01623+K00131+K00850+K01689+K00895+K00134+K00895+K00121+K01835+K00873+K01913+K00927+K00850+K15633+K00382+K00844+K00850+K01792+K00134+K00161+…	Down
Tryptophan metabolism	ko00380	34	212	2614	19416	BolC01g000930.2J;BolC01g002580.2J;BolC01g004630.2J;BolC01g019080.2J;BolC01g025400.2J;BolC01g040420.2J;BolC01g047370.2J;BolC02g020450.2J;BolC02g020460.2J;BolC02g027420.2J;BolC02g030760.2J;BolC02g057910.2J;BolC02g057960.2J;BolC02g058040.2J;BolC03g044650.2J;BolC03g061260.2J;BolC03g068040.2J;BolC03g073270.2J;BolC03g074650.2J;BolC03g075060.2J;BolC05g022270.2J;BolC06g002320.2J;BolC06g033020.2J;BolC06g0…	K11812+K00128+K00128+K16903+K00382+K01237+K23947+K03781+K03781+K16903+K11821+K01237+K01237+K01237+K00382+K00128+K22450+K11812+K00128+K00128+K11820+K00382+K11821+K11821+K11819+K11819+K01593+K00128+K11812+K01426+K01237+K01237+K01237+K11817	Down
Fatty acid metabolism	ko01212	35	155	2614	19416	BolC01g023600.2J;BolC01g046660.2J;BolC02g013070.2J;BolC02g023750.2J;BolC02g055850.2J;BolC03g004740.2J;BolC03g008340.2J;BolC03g017970.2J;BolC03g022670.2J;BolC03g026600.2J;BolC03g028210.2J;BolC03g050600.2J;BolC03g068930.2J;BolC04g005040.2J;BolC04g019750.2J;BolC04g049390.2J;BolC04g056450.2J;BolC04g068410.2J;BolC05g006390.2J;BolC05g024550.2J;BolC05g024630.2J;BolC05g033660.2J;BolC05g050100.2J;BolC06g0…	K01074+K18660+K10703+K10251+K07513+K10703+K02160+K00645+K01962+K03921+K01897+K00208+K00059+K03921+K00645+K02372+K00645+K01897+K10781+K10251+K00059+K01897+K18660+K10251+K09458+K00208+K00059+K10251+K11262+K10781+K10258+K01961+K01897+K00648+K10703	Down
Lysine degradation	ko00310	12	103	2614	19416	BolC01g002580.2J;BolC01g004630.2J;BolC01g025400.2J;BolC03g044650.2J;BolC03g061260.2J;BolC03g074650.2J;BolC03g075060.2J;BolC04g050970.2J;BolC06g002320.2J;BolC06g048160.2J;BolC07g058670.2J;BolC08g058510.2J	K00128+K00128+K00382+K00382+K00128+K00128+K00128+K11420+K00382+K11423+K00128+K11422	Down
Betalain biosynthesis	ko00965	7	56	2614	19416	BolC01g019070.2J;BolC03g055130.2J;BolC06g016360.2J;BolC07g000610.2J;BolC08g017440.2J;BolC09g023090.2J;BolC09g023120.2J	K15777+K15777+K15777+K01593+K15777+K15777+K15777	Down
Glycosphingolipid biosynthesis - ganglio series	ko00604	11	70	2614	19416	BolC01g020740.2J;BolC01g032390.2J;BolC04g021840.2J;BolC04g058820.2J;BolC05g052790.2J;BolC06g001090.2J;BolC06g037000.2J;BolC06g039330.2J;BolC07g058720.2J;BolC08g058620.2J;BolC09g068630.2J	K12309+K12309+K12309+K12309+K12309+K12309+K12373+K12309+K12309+K12373+K12309	Down
Fatty acid biosynthesis	ko00061	26	105	2614	19416	BolC01g046660.2J;BolC03g008340.2J;BolC03g017970.2J;BolC03g022670.2J;BolC03g026600.2J;BolC03g028210.2J;BolC03g049730.2J;BolC03g050600.2J;BolC03g068930.2J;BolC04g005040.2J;BolC04g019750.2J;BolC04g049390.2J;BolC04g056450.2J;BolC04g068410.2J;BolC05g006390.2J;BolC05g024630.2J;BolC05g033660.2J;BolC05g050100.2J;BolC06g046250.2J;BolC07g009450.2J;BolC07g017770.2J;BolC08g009970.2J;BolC08g019870.2J;BolC08g0…	K18660+K02160+K00645+K01962+K03921+K01897+K10782+K00208+K00059+K03921+K00645+K02372+K00645+K01897+K10781+K00059+K01897+K18660+K09458+K00208+K00059+K11262+K10781+K01961+K01897+K00648	Down
Glyoxylate and dicarboxylate metabolism	ko00630	63	354	2614	19416	BolC01g001230.2J;BolC01g001500.2J;BolC01g005590.2J;BolC01g025400.2J;BolC01g036380.2J;BolC01g048330.2J;BolC01g048340.2J;BolC01g048610.2J;BolC02g003780.2J;BolC02g007550.2J;BolC02g020450.2J;BolC02g020460.2J;BolC02g022220.2J;BolC02g036130.2J;BolC03g043110.2J;BolC03g044650.2J;BolC03g050490.2J;BolC03g054660.2J;BolC03g073550.2J;BolC03g081120.2J;BolC04g013540.2J;BolC04g013870.2J;BolC04g041220.2J;BolC04g0…	K00600+K01455+K00281+K00382+K00605+K11517+K11517+K11517+K00026+K01915+K03781+K03781+K01915+K15918+K11517+K00382+K01681+K22133+K00600+K00600+K02437+K02437+K00600+K01915+K19269+K01915+K01602+K01602+K01602+K18121+K01637+K14272+K02437+K02437+K01913+K11517+K11517+K11517+K00382+K00026+K00026+K01602+K01647+K15918+K00600+K22133+K22133+K14272+K00600+K01637+K15919+K18121+K14272+K00025+K00600+K02437+K01915+…	Down
ABC transporters	ko02010	21	208	2614	19416	BolC01g019750.2J;BolC01g020450.2J;BolC01g025310.2J;BolC02g002650.2J;BolC02g028680.2J;BolC02g051750.2J;BolC02g053960.2J;BolC04g011100.2J;BolC04g040120.2J;BolC04g053840.2J;BolC05g012850.2J;BolC05g025430.2J;BolC05g041490.2J;BolC05g049940.2J;BolC06g000940.2J;BolC06g012860.2J;BolC06g025400.2J;BolC06g034290.2J;BolC07g051970.2J;BolC08g026730.2J;BolC09g065140.2J	K05658+K05658+K05677+K05681+K05681+K05681+K05658+K08712+K05681+K08712+K08712+K05658+K05665+K08712+K05665+K05681+K05665+K05656+K05658+K05681+K05681	Down
Benzoxazinoid biosynthesis	ko00402	3	31	2614	19416	BolC03g009650.2J;BolC05g004700.2J;BolC08g058080.2J	K13229+K13229+K13229	Down
Riboflavin metabolism	ko00740	9	53	2614	19416	BolC01g014660.2J;BolC03g056520.2J;BolC03g064070.2J;BolC03g073280.2J;BolC05g055710.2J;BolC07g000200.2J;BolC08g032500.2J;BolC09g021960.2J;BolC09g068420.2J	K20884+K14652+K14394+K20884+K22912+K00793+K20884+K20884+K00953	Down
Valine, leucine and isoleucine biosynthesis	ko00290	12	61	2614	19416	BolC02g006120.2J;BolC02g035990.2J;BolC04g004590.2J;BolC04g058040.2J;BolC05g007900.2J;BolC06g008260.2J;BolC06g015100.2J;BolC06g024480.2J;BolC07g012420.2J;BolC08g008400.2J;BolC08g033700.2J;BolC08g042340.2J	K21360+K00052+K21359+K01653+K00826+K00053+K00053+K00053+K01687+K01703+K00826+K00053	Down
alpha-Linolenic acid metabolism	ko00592	18	117	2614	19416	BolC02g008940.2J;BolC02g029480.2J;BolC02g030450.2J;BolC02g033060.2J;BolC02g055850.2J;BolC03g050590.2J;BolC05g028280.2J;BolC05g060390.2J;BolC05g063620.2J;BolC06g032110.2J;BolC07g001880.2J;BolC07g033580.2J;BolC08g007140.2J;BolC08g009030.2J;BolC08g024580.2J;BolC08g026470.2J;BolC08g051420.2J;BolC09g029020.2J	K16818+K00454+K10529+K05894+K07513+K05894+K16818+K10529+K18858+K10529+K01047+K10525+K16818+K00224+K10525+K00454+K00454+K10525	Down
Linoleic acid metabolism	ko00591	5	96	2614	19416	BolC01g033690.2J;BolC02g029480.2J;BolC07g001880.2J;BolC08g026470.2J;BolC08g051420.2J	K15718+K00454+K01047+K00454+K00454	Down
Sulfur relay system	ko04122	3	23	2614	19416	BolC05g014030.2J;BolC06g028640.2J;BolC09g009840.2J	K01011+K01011+K04487	Down
Isoquinoline alkaloid biosynthesis	ko00950	8	87	2614	19416	BolC01g007040.2J;BolC01g010540.2J;BolC02g009850.2J;BolC02g063530.2J;BolC04g049410.2J;BolC07g000610.2J;BolC07g058560.2J;BolC08g048660.2J	K00811+K01592+K14454+K00276+K15849+K01593+K00276+K15849	Down
Flavonoid biosynthesis	ko00941	19	147	2614	19416	BolC01g016390.2J;BolC01g025590.2J;BolC02g006000.2J;BolC02g061690.2J;BolC03g006710.2J;BolC03g013600.2J;BolC03g068600.2J;BolC03g080010.2J;BolC04g009300.2J;BolC06g008550.2J;BolC06g021990.2J;BolC07g057420.2J;BolC08g035550.2J;BolC08g039120.2J;BolC09g023150.2J;BolC09g059140.2J;BolC09g063480.2J;BolC09g064000.2J;BolC09g066690.2J	K05277+K13065+K00660+K05278+K00660+K13065+K00588+K00588+K01859+K01859+K01859+K00588+K00475+K01859+K13082+K00660+K05278+K05280+K01859	Down
RNA transport	ko03013	41	786	2614	19416	BolC01g022010.2J;BolC01g048820.2J;BolC01g055270.2J;BolC02g012650.2J;BolC02g012660.2J;BolC02g031200.2J;BolC02g032370.2J;BolC03g009460.2J;BolC03g011880.2J;BolC03g015380.2J;BolC04g016840.2J;BolC04g028300.2J;BolC04g050650.2J;BolC04g052290.2J;BolC04g062110.2J;BolC05g001650.2J;BolC05g018090.2J;BolC05g043490.2J;BolC05g050310.2J;BolC05g062270.2J;BolC06g001150.2J;BolC06g001640.2J;BolC06g008870.2J;BolC06g0…	K03113+K03257+K14289+K03231+K03231+K00784+K14525+K05749+K03231+K03113+K18213+K14307+K13126+K03253+K03538+K09291+K14525+K14291+K03239+K14004+K14292+K14319+K03239+K03257+K14292+K10577+K03245+K14318+K14525+K14525+K13126+K10577+K14319+K13126+K03243+K03243+K03231+K03231+K12812+K03237+K13126	Down
Purine metabolism	ko00230	63	315	2614	19416	BolC01g000920.2J;BolC01g022630.2J;BolC01g024060.2J;BolC01g027020.2J;BolC01g029710.2J;BolC01g052580.2J;BolC02g004590.2J;BolC02g023590.2J;BolC02g037650.2J;BolC02g040980.2J;BolC03g001300.2J;BolC03g004110.2J;BolC03g009370.2J;BolC03g009400.2J;BolC03g022040.2J;BolC03g023300.2J;BolC03g035590.2J;BolC03g047190.2J;BolC03g048340.2J;BolC03g051190.2J;BolC03g069180.2J;BolC03g086410.2J;BolC04g002350.2J;BolC04g0…	K00860+K00856+K14977+K13811+K00873+K00856+K00759+K01427+K00951+K00940+K00856+K00873+K14641+K14641+K00939+K24242+K00939+K01923+K13811+K00860+K00759+K00940+K18532+K00942+K01510+K13811+K01835+K00759+K00873+K13811+K00759+K01923+K00759+K01081+K00365+K10808+K00939+K14977+K00759+K00856+K00860+K00860+K00939+K03787+K13811+K01835+K00873+K01939+K00106+K00106+K00951+K00939+K00860+K00940+K01488+K00940+K01835+…	Down
Plant-pathogen interaction	ko04626	197	1497	2614	19416	BolC01g005320.2J;BolC01g007240.2J;BolC01g007580.2J;BolC01g013850.2J;BolC01g015300.2J;BolC01g015520.2J;BolC01g017950.2J;BolC01g018040.2J;BolC01g027110.2J;BolC01g027150.2J;BolC01g028360.2J;BolC01g030440.2J;BolC01g030450.2J;BolC01g042390.2J;BolC01g045170.2J;BolC01g048120.2J;BolC01g048370.2J;BolC01g052390.2J;BolC01g053200.2J;BolC02g000180.2J;BolC02g005350.2J;BolC02g008670.2J;BolC02g008800.2J;BolC02g0…	K13457+K18834+K13425+K02358+K13412+K13430+K13416+K16225+K13466+K13466+K13448+K18875+K18875+K13412+K05391+K13420+K13436+K13448+K13430+K18834+K13466+K16226+K13420+K16226+K02183+K16224+K16224+K05391+K13436+K18835+K13436+K13425+K16225+K15397+K16226+K16226+K13436+K16225+K13447+K13457+K20600+K13412+K02183+K02183+K16224+K16224+K16224+K16225+K13424+K13412+K02183+K13413+K16225+K13448+K13456+K13412+K13436+…	Down
Aminoacyl-tRNA biosynthesis	ko00970	34	388	2614	19416	BolC01g004990.2J;BolC01g056840.2J;BolC02g048580.2J;BolC02g055970.2J;BolC03g014750.2J;BolC03g032980.2J;BolC03g049080.2J;BolC03g050250.2J;BolC03g080770.2J;BolC05g006410.2J;BolC05g027380.2J;BolC05g053130.2J;BolC06g015690.2J;BolC06g029520.2J;BolC07g004350.2J;BolC07g015720.2J;BolC07g016960.2J;BolC07g030630.2J;BolC07g038110.2J;BolC07g047260.2J;BolC07g049610.2J;BolC08g016240.2J;BolC08g019880.2J;BolC08g0…	K01876+K01866+K02433+K01870+K02433+K01869+K02434+K01868+K02435+K01872+K01880+K04567+K01870+K01890+K01867+K01880+K01866+K02433+K01870+K01883+K01870+K01893+K01872+K01874+K01889+K02433+K01868+K02433+K02433+K02433+K02433+K01867+K01870+K02433	Down
Various types of N-glycan biosynthesis	ko00513	10	95	2614	19416	BolC01g037500.2J;BolC03g001980.2J;BolC03g011100.2J;BolC05g014470.2J;BolC05g030440.2J;BolC06g037000.2J;BolC06g043440.2J;BolC08g026070.2J;BolC08g026480.2J;BolC08g058620.2J	K12669+K03844+K12668+K03844+K12668+K12373+K14412+K03844+K01230+K12373	Down
DNA replication	ko03030	24	598	2614	19416	BolC01g010740.2J;BolC02g033670.2J;BolC03g056880.2J;BolC04g008580.2J;BolC04g022970.2J;BolC04g065560.2J;BolC05g006140.2J;BolC05g006490.2J;BolC05g008520.2J;BolC05g011950.2J;BolC05g020050.2J;BolC06g000930.2J;BolC06g029760.2J;BolC07g026860.2J;BolC07g028870.2J;BolC07g039730.2J;BolC07g040230.2J;BolC07g053910.2J;BolC09g011310.2J;Brassica_oleracea_newGene_1661;Brassica_oleracea_newGene_2714;Brassica_olera…	K07466+K10756+K02327+K10745+K02326+K02328+K02324+K02327+K07466+K10755+K10755+K02540+K10756+K02542+K02541+K10756+K04799+K07466+K02209+K07466+K07466+K07466+K07466+K07466	Down
Amino sugar and nucleotide sugar metabolism	ko00520	75	867	2614	19416	BolC01g013430.2J;BolC01g019030.2J;BolC01g019040.2J;BolC01g032000.2J;BolC01g047980.2J;BolC01g057060.2J;BolC01g057120.2J;BolC02g006980.2J;BolC02g007080.2J;BolC02g008340.2J;BolC02g009430.2J;BolC02g031290.2J;BolC02g033580.2J;BolC02g062270.2J;BolC03g008880.2J;BolC03g008900.2J;BolC03g010530.2J;BolC03g023270.2J;BolC03g027640.2J;BolC03g030650.2J;BolC03g035710.2J;BolC03g044560.2J;BolC03g048520.2J;BolC03g0…	K01183+K01810+K01810+K08678+K12450+K13648+K13379+K00012+K13379+K00326+K00975+K00966+K12447+K15920+K00963+K00963+K00326+K13648+K17497+K13379+K16190+K12447+K01183+K13648+K17497+K08678+K13648+K01183+K00012+K08678+K01183+K00770+K20547+K12451+K12450+K02377+K01835+K00972+K12450+K13379+K00963+K00844+K12450+K00012+K12373+K00847+K00966+K15920+K00975+K13648+K01810+K13648+K00975+K10046+K01711+K20547+K12449+…	Down
Non-homologous end-joining	ko03450	2	17	2614	19416	BolC07g040230.2J;BolC08g005510.2J	K04799+K10885	Down
Proteasome	ko03050	33	300	2614	19416	BolC01g007830.2J;BolC01g033880.2J;BolC02g035100.2J;BolC02g059720.2J;BolC03g050660.2J;BolC03g081760.2J;BolC05g009940.2J;BolC05g026700.2J;BolC06g008730.2J;BolC06g015060.2J;BolC06g015070.2J;BolC06g016300.2J;BolC06g016580.2J;BolC06g028650.2J;BolC06g034370.2J;BolC06g050130.2J;BolC07g009570.2J;BolC07g035110.2J;BolC07g044620.2J;BolC07g055860.2J;BolC08g014160.2J;BolC08g019230.2J;BolC08g035570.2J;BolC08g0…	K02738+K02736+K02726+K03030+K02730+K02738+K02737+K03036+K03061+K03061+K03061+K02728+K02734+K02726+K06699+K02726+K02730+K02739+K02731+K02738+K02734+K03028+K02731+K03029+K02732+K02737+K03038+K06699+K02736+K02725+K03038+K10881+K10881	Down
Ribosome biogenesis in eukaryotes	ko03008	29	296	2614	19416	BolC02g004740.2J;BolC02g032370.2J;BolC02g039480.2J;BolC02g040810.2J;BolC02g058470.2J;BolC04g002350.2J;BolC04g005300.2J;BolC04g006160.2J;BolC04g024370.2J;BolC04g062110.2J;BolC05g011100.2J;BolC05g018090.2J;BolC05g057740.2J;BolC06g014200.2J;BolC06g023150.2J;BolC06g027950.2J;BolC06g042680.2J;BolC07g003380.2J;BolC07g022500.2J;BolC07g040700.2J;BolC07g040930.2J;BolC07g044630.2J;BolC08g010540.2J;BolC08g0…	K03097+K14525+K12845+K11131+K03097+K18532+K14574+K03115+K12619+K03538+K14544+K14525+K03097+K14537+K11131+K14558+K14573+K14552+K14525+K14570+K03097+K07179+K14548+K14521+K14525+K14570+K11883+K14555+K14553	Down
Ribosome	ko03010	325	783	2614	19416	BolC01g000880.2J;BolC01g007350.2J;BolC01g009770.2J;BolC01g011600.2J;BolC01g012450.2J;BolC01g017710.2J;BolC01g020160.2J;BolC01g021970.2J;BolC01g024470.2J;BolC01g026540.2J;BolC01g029830.2J;BolC01g029860.2J;BolC01g032820.2J;BolC01g038880.2J;BolC01g040490.2J;BolC01g044210.2J;BolC01g045320.2J;BolC01g047700.2J;BolC01g050490.2J;BolC01g051180.2J;BolC01g052670.2J;BolC01g052760.2J;BolC01g053010.2J;BolC01g0…	K02892+K02991+K02903+K02912+K02868+K02897+K02947+K02875+K02877+K02901+K02873+K02949+K02939+K02929+K02901+K02908+K02906+K02968+K02864+K02955+K02973+K02918+K02941+K02905+K02883+K02891+K02974+K02984+K02993+K02966+K02973+K02979+K02962+K02987+K02991+K02884+K02864+K02997+K02995+K02957+K02987+K02942+K02910+K02983+K02895+K02969+K02915+K02866+K02900+K02998+K02917+K02952+K02871+K02940+K02925+K02940+K02868+…	Down
Cyanoamino acid metabolism	ko00460	37	256	2614	19416	BolC01g000670.2J;BolC01g001230.2J;BolC01g001500.2J;BolC01g044800.2J;BolC02g010990.2J;BolC02g011540.2J;BolC02g029880.2J;BolC03g013050.2J;BolC03g013060.2J;BolC03g028380.2J;BolC03g066600.2J;BolC03g073550.2J;BolC03g081120.2J;BolC04g030520.2J;BolC04g031550.2J;BolC04g041220.2J;BolC04g045440.2J;BolC04g050790.2J;BolC04g050800.2J;BolC04g068670.2J;BolC05g010980.2J;BolC05g023500.2J;BolC06g033950.2J;BolC06g0…	K18592+K00600+K01455+K05350+K05349+K13035+K08248+K01188+K01188+K01188+K05349+K00600+K00600+K01188+K13034+K00600+K20802+K20802+K20802+K01188+K05350+K01188+K00600+K00600+K01188+K01188+K01188+K01188+K01188+K01188+K01188+K20802+K00600+K13034+K01188+K20802+K01188	Down
RNA polymerase	ko03020	5	230	2614	19416	BolC03g017590.2J;BolC09g062920.2J;BolCnng000950.2J;Brassica_oleracea_newGene_1940;Brassica_oleracea_newGene_2785	K03011+K03012+K03043+K03006+K03007	Down
Pantothenate and CoA biosynthesis	ko00770	18	111	2614	19416	BolC01g002580.2J;BolC01g003540.2J;BolC01g004630.2J;BolC02g000590.2J;BolC03g052880.2J;BolC03g061260.2J;BolC03g074650.2J;BolC03g075060.2J;BolC03g081240.2J;BolC04g058040.2J;BolC05g007900.2J;BolC06g008260.2J;BolC06g015100.2J;BolC06g024480.2J;BolC07g012420.2J;BolC07g058670.2J;BolC08g033700.2J;BolC08g042340.2J	K00128+K09680+K00128+K01922+K09680+K00128+K00128+K00128+K09680+K01653+K00826+K00053+K00053+K00053+K01687+K00128+K00826+K00053	Down
Ether lipid metabolism	ko00565	8	78	2614	19416	BolC01g030270.2J;BolC01g047090.2J;BolC03g027560.2J;BolC04g053830.2J;BolC05g000180.2J;BolC05g010960.2J;BolC05g010970.2J;BolC07g001880.2J	K01114+K01115+K13510+K01114+K01115+K00993+K00993+K01047	Down
Ascorbate and aldarate metabolism	ko00053	42	389	2614	19416	BolC01g002580.2J;BolC01g004630.2J;BolC01g021740.2J;BolC02g006980.2J;BolC02g011090.2J;BolC02g011100.2J;BolC02g011110.2J;BolC02g018170.2J;BolC02g033580.2J;BolC02g048430.2J;BolC02g053660.2J;BolC03g001470.2J;BolC03g031150.2J;BolC03g035710.2J;BolC03g044560.2J;BolC03g053320.2J;BolC03g061260.2J;BolC03g067610.2J;BolC03g072440.2J;BolC03g074650.2J;BolC03g075060.2J;BolC04g044520.2J;BolC05g017330.2J;BolC05g0…	K00128+K00128+K14190+K00012+K00423+K00423+K00423+K00434+K12447+K10047+K08232+K08232+K00434+K16190+K12447+K00423+K00128+K00225+K18649+K00128+K00128+K00012+K21888+K10047+K00434+K00012+K08232+K00434+K10046+K10047+K00434+K00434+K00128+K21888+K08232+K12447+K00434+K08232+K00434+K00423+K10047+K00012	Down
Phosphatidylinositol signaling system	ko04070	61	257	2614	19416	BolC01g008740.2J;BolC01g011490.2J;BolC01g048500.2J;BolC02g003190.2J;BolC02g011210.2J;BolC02g014060.2J;BolC02g014090.2J;BolC02g023990.2J;BolC02g037070.2J;BolC02g048430.2J;BolC02g061770.2J;BolC02g061910.2J;BolC03g003670.2J;BolC03g006140.2J;BolC03g008520.2J;BolC03g011110.2J;BolC03g024940.2J;BolC03g035180.2J;BolC03g046260.2J;BolC03g056840.2J;BolC03g056860.2J;BolC03g057150.2J;BolC03g062330.2J;BolC03g0…	K00901+K01092+K00921+K00901+K02183+K05857+K05857+K00999+K01092+K10047+K00901+K15422+K00901+K02183+K00913+K02183+K02183+K01092+K01110+K15422+K15422+K00901+K02183+K02183+K18649+K01092+K01092+K02183+K02183+K18081+K02183+K00921+K01092+K00889+K10047+K20279+K20279+K00921+K02183+K18081+K20279+K20279+K00901+K10572+K02183+K10047+K21797+K18081+K02183+K00981+K02183+K02183+K02183+K10572+K05857+K05857+K02183+…	Down
Limonene and pinene degradation	ko00903	6	19	2614	19416	BolC01g002580.2J;BolC01g004630.2J;BolC03g061260.2J;BolC03g074650.2J;BolC03g075060.2J;BolC07g058670.2J	K00128+K00128+K00128+K00128+K00128+K00128	Down
Autophagy - other	ko04136	8	101	2614	19416	BolC01g057180.2J;BolC02g019680.2J;BolC03g025880.2J;BolC03g026740.2J;BolC03g059880.2J;BolC04g004100.2J;BolC04g005230.2J;BolC09g056000.2J	K17908+K17606+K04382+K08333+K08331+K04382+K08333+K08339	Down
Fructose and mannose metabolism	ko00051	36	179	2614	19416	BolC01g009960.2J;BolC01g009980.2J;BolC01g021210.2J;BolC01g023470.2J;BolC02g031290.2J;BolC03g027640.2J;BolC03g072260.2J;BolC04g007180.2J;BolC04g036600.2J;BolC04g038080.2J;BolC04g048600.2J;BolC04g048770.2J;BolC04g061680.2J;BolC05g010820.2J;BolC05g015550.2J;BolC05g018960.2J;BolC05g056520.2J;BolC06g005160.2J;BolC06g020260.2J;BolC06g037560.2J;BolC06g046200.2J;BolC07g044560.2J;BolC07g060370.2J;BolC08g0…	K00850+K00850+K01623+K19355+K00966+K17497+K01623+K17497+K01803+K03841+K01803+K01623+K00850+K00895+K02377+K00895+K00850+K00844+K00850+K00847+K00966+K01711+K01623+K01103+K00895+K01711+K00850+K03841+K01803+K00850+K01623+K01803+K01103+K19355+K00844+K00850	Down
Phenylalanine, tyrosine and tryptophan biosynthesis	ko00400	29	140	2614	19416	BolC01g000540.2J;BolC01g007040.2J;BolC01g054340.2J;BolC01g056700.2J;BolC02g008560.2J;BolC02g009850.2J;BolC02g011820.2J;BolC02g028580.2J;BolC03g009540.2J;BolC03g027390.2J;BolC03g036430.2J;BolC03g049980.2J;BolC04g044080.2J;BolC04g049140.2J;BolC04g049410.2J;BolC04g061930.2J;BolC05g009350.2J;BolC05g020720.2J;BolC05g034200.2J;BolC05g059230.2J;BolC05g063020.2J;BolC06g043360.2J;BolC07g053090.2J;BolC08g0…	K00891+K00811+K13832+K13832+K00766+K14454+K05359+K00817+K13832+K00800+K13832+K01609+K06001+K00891+K15849+K01657+K01696+K01626+K01736+K13832+K13832+K00817+K01696+K01626+K01695+K15849+K01695+K05359+K01657	Down
Selenocompound metabolism	ko00450	19	65	2614	19416	BolC01g027020.2J;BolC02g008490.2J;BolC02g021500.2J;BolC02g025710.2J;BolC03g009250.2J;BolC03g025240.2J;BolC03g036730.2J;BolC03g048340.2J;BolC04g003330.2J;BolC05g006380.2J;BolC05g017810.2J;BolC05g039450.2J;BolC05g062440.2J;BolC08g028360.2J;BolC08g039370.2J;BolC08g040970.2J;BolC09g012480.2J;BolC09g016360.2J;BolC09g055230.2J	K13811+K00549+K08247+K00549+K00549+K00384+K00549+K13811+K00384+K11717+K13811+K13811+K01739+K13811+K01874+K01760+K00384+K01761+K00549	Down
Ubiquitin mediated proteolysis	ko04120	51	483	2614	19416	BolC01g002190.2J;BolC01g023160.2J;BolC01g029100.2J;BolC01g043530.2J;BolC01g044660.2J;BolC01g053240.2J;BolC01g053780.2J;BolC01g056960.2J;BolC02g016500.2J;BolC02g022130.2J;BolC03g016240.2J;BolC03g021210.2J;BolC03g021360.2J;BolC03g027710.2J;BolC03g028120.2J;BolC03g038910.2J;BolC03g045740.2J;BolC03g056100.2J;BolC03g068960.2J;BolC04g008820.2J;BolC04g016280.2J;BolC04g030770.2J;BolC04g032760.2J;BolC04g0…	K10579+K06689+K10260+K10260+K08770+K06689+K10260+K10615+K06689+K10260+K06689+K10260+K02927+K10576+K02977+K10260+K10260+K10260+K10260+K03354+K10143+K02977+K03094+K02927+K10260+K10260+K10580+K10260+K10260+K10615+K10260+K10577+K02977+K10580+K03875+K10570+K10580+K06689+K02977+K10260+K10260+K03875+K10260+K02927+K10615+K10577+K02977+K10144+K10143+K06689+K03875	Down
Base excision repair	ko03410	10	116	2614	19416	BolC03g056880.2J;BolC04g018470.2J;BolC04g022970.2J;BolC04g065560.2J;BolC05g006140.2J;BolC05g006490.2J;BolC05g020080.2J;BolC06g013970.2J;BolC07g040230.2J;BolC08g058480.2J	K02327+K24070+K02326+K02328+K02324+K02327+K03660+K10563+K04799+K10773	Down
Starch and sucrose metabolism	ko00500	99	629	2614	19416	BolC01g000770.2J;BolC01g015970.2J;BolC01g018290.2J;BolC01g019030.2J;BolC01g019040.2J;BolC01g024000.2J;BolC01g044800.2J;BolC01g053170.2J;BolC02g009430.2J;BolC02g010990.2J;BolC02g020910.2J;BolC02g021870.2J;BolC02g022240.2J;BolC02g025970.2J;BolC02g041410.2J;BolC02g060230.2J;BolC03g005470.2J;BolC03g008880.2J;BolC03g008900.2J;BolC03g013050.2J;BolC03g013060.2J;BolC03g015230.2J;BolC03g020650.2J;BolC03g0…	K01087+K01087+K01194+K01810+K01810+K01177+K05350+K01176+K00975+K05349+K01087+K01179+K19891+K19891+K00696+K19891+K01187+K00963+K00963+K01188+K01188+K19891+K01179+K01188+K01087+K01176+K00700+K00703+K05349+K07024+K19891+K01214+K01179+K01177+K19891+K01188+K19892+K19891+K01087+K01188+K16055+K05350+K16055+K01835+K01188+K13679+K00963+K00844+K01193+K07024+K19891+K19891+K19892+K00688+K00847+K01179+K16055+…	Down
Photosynthesis - antenna proteins	ko00196	22	45	2614	19416	BolC02g017970.2J;BolC02g041240.2J;BolC02g053590.2J;BolC03g020300.2J;BolC03g031810.2J;BolC03g050340.2J;BolC03g071060.2J;BolC04g007730.2J;BolC04g014680.2J;BolC04g025480.2J;BolC04g027230.2J;BolC07g015680.2J;BolC07g015690.2J;BolC07g035420.2J;BolC08g007100.2J;BolC08g027510.2J;BolC08g038840.2J;BolC09g003510.2J;BolC09g033220.2J;BolC09g041550.2J;BolC09g053160.2J;BolCnng006120.2J	K08914+K08916+K08913+K08912+K08916+K08913+K08912+K08915+K08912+K08912+K08909+K08912+K08912+K08913+K08911+K08908+K08907+K08913+K08916+K08914+K08917+K08908	Down
Carotenoid biosynthesis	ko00906	34	91	2614	19416	BolC01g025670.2J;BolC02g007940.2J;BolC02g020040.2J;BolC02g045780.2J;BolC02g052670.2J;BolC03g008840.2J;BolC03g013980.2J;BolC03g034670.2J;BolC03g071840.2J;BolC04g040870.2J;BolC04g060900.2J;BolC05g045220.2J;BolC05g052010.2J;BolC05g056380.2J;BolC05g060760.2J;BolC06g007060.2J;BolC06g013910.2J;BolC06g020450.2J;BolC06g049370.2J;BolC07g027980.2J;BolC07g048330.2J;BolC07g057450.2J;BolC08g012900.2J;BolC08g0…	K09835+K02291+K15746+K09843+K09841+K02291+K06444+K17911+K02293+K02293+K09838+K09843+K09840+K06443+K00514+K09841+K15748+K09837+K09840+K09843+K09843+K14595+K15747+K15747+K09838+K09835+K17911+K09838+K17911+K17911+K09835+K09843+K06444+K02291	Down
Nicotinate and nicotinamide metabolism	ko00760	13	52	2614	19416	BolC02g003570.2J;BolC03g010520.2J;BolC03g021410.2J;BolC03g047150.2J;BolC03g085750.2J;BolC05g042130.2J;BolC06g009330.2J;BolC06g030930.2J;BolC06g036230.2J;BolC06g049490.2J;BolC08g014220.2J;BolC08g047860.2J;BolC09g058420.2J	K11414+K03426+K01240+K00858+K01950+K00858+K01950+K01081+K03517+K00858+K03787+K00763+K00278	Down
Fatty acid elongation	ko00062	22	75	2614	19416	BolC01g023600.2J;BolC02g013070.2J;BolC02g023750.2J;BolC02g043870.2J;BolC03g004740.2J;BolC04g001900.2J;BolC04g021640.2J;BolC04g053590.2J;BolC05g000740.2J;BolC05g002410.2J;BolC05g005590.2J;BolC05g023950.2J;BolC05g024550.2J;BolC06g038950.2J;BolC07g006980.2J;BolC07g017840.2J;BolC07g025450.2J;BolC08g039280.2J;BolC08g046340.2J;BolC08g060390.2J;BolC09g062230.2J;BolC09g067050.2J	K01074+K10703+K10251+K15397+K10703+K15397+K15397+K15397+K15397+K15397+K15397+K15397+K10251+K10251+K15397+K10251+K15397+K10258+K15397+K15397+K10703+K15397	Down
Glycerolipid metabolism	ko00561	48	284	2614	19416	BolC01g002580.2J;BolC01g004630.2J;BolC01g008740.2J;BolC01g010410.2J;BolC02g003190.2J;BolC02g008760.2J;BolC02g017320.2J;BolC02g031360.2J;BolC02g036130.2J;BolC02g046240.2J;BolC02g061770.2J;BolC03g003670.2J;BolC03g003950.2J;BolC03g003960.2J;BolC03g015330.2J;BolC03g022350.2J;BolC03g034690.2J;BolC03g057150.2J;BolC03g061260.2J;BolC03g070820.2J;BolC03g074650.2J;BolC03g075060.2J;BolC04g010550.2J;BolC04g0…	K00128+K00128+K00901+K00679+K00901+K00679+K00679+K13513+K15918+K00679+K00901+K00901+K07407+K07407+K00679+K00002+K13508+K00901+K00128+K00679+K00128+K00128+K00002+K00655+K13523+K00630+K00679+K00679+K21362+K18693+K13523+K15918+K00679+K21362+K01054+K01054+K00901+K00679+K18693+K00128+K00630+K01054+K01054+K21362+K13508+K18693+K24189+K00679	Down
Indole alkaloid biosynthesis	ko00901	5	30	2614	19416	BolC02g030720.2J;BolC03g025040.2J;BolC04g035080.2J;BolC07g000610.2J;BolC09g051040.2J	K01757+K01757+K01757+K01593+K01757	Down
Vitamin B6 metabolism	ko00750	12	27	2614	19416	BolC02g000370.2J;BolC02g029850.2J;BolC03g000470.2J;BolC03g030320.2J;BolC03g075090.2J;BolC04g043660.2J;BolC05g015270.2J;BolC08g002460.2J;BolC08g026650.2J;BolC09g013710.2J;BolC09g040510.2J;BolC09g049770.2J	K06215+K13248+K06215+K23998+K00831+K00868+K13248+K05275+K13248+K01733+K05275+K08681	Down
Phagosome	ko04145	70	257	2614	19416	BolC01g000240.2J;BolC01g003850.2J;BolC01g004690.2J;BolC01g006610.2J;BolC01g017930.2J;BolC01g025540.2J;BolC01g045820.2J;BolC01g048500.2J;BolC01g057590.2J;BolC02g032520.2J;BolC02g036470.2J;BolC02g038080.2J;BolC02g040880.2J;BolC02g044480.2J;BolC02g045390.2J;BolC02g057270.2J;BolC03g008570.2J;BolC03g010350.2J;BolC03g031560.2J;BolC03g034270.2J;BolC03g035820.2J;BolC03g052110.2J;BolC03g058410.2J;BolC03g0…	K02155+K04392+K02144+K03661+K02152+K10956+K02155+K00921+K02152+K01368+K08057+K02151+K02150+K07375+K07374+K07374+K08488+K07374+K07897+K02151+K02152+K02155+K07375+K07375+K07375+K02155+K02154+K02155+K03661+K07897+K07375+K02149+K02154+K10956+K02148+K08517+K02155+K00921+K02147+K07897+K07374+K02152+K07374+K00921+K02149+K04392+K02147+K02145+K04392+K02147+K07375+K07375+K02152+K02144+K02155+K08057+K04392+…	Down
Phosphonate and phosphinate metabolism	ko00440	4	34	2614	19416	BolC01g026400.2J;BolC05g010960.2J;BolC05g010970.2J;BolC08g058740.2J	K00968+K00993+K00993+K00968	Down
Alanine, aspartate and glutamate metabolism	ko00250	21	147	2614	19416	BolC01g007040.2J;BolC02g007550.2J;BolC02g009850.2J;BolC02g022220.2J;BolC02g026220.2J;BolC03g004570.2J;BolC03g008920.2J;BolC03g055630.2J;BolC03g061780.2J;BolC04g042400.2J;BolC04g043330.2J;BolC05g021660.2J;BolC06g042010.2J;BolC07g020180.2J;BolC08g012040.2J;BolC08g041640.2J;BolC09g055950.2J;BolC09g056690.2J;BolC09g058420.2J;Brassica_oleracea_newGene_1252;Brassica_oleracea_newGene_5992	K00811+K01915+K14454+K01915+K01956+K01953+K01580+K01953+K01953+K01915+K01915+K14272+K14272+K14272+K01915+K01939+K01580+K01915+K00278+K01940+K01940	Down
Ubiquinone and other terpenoid-quinone biosynthesis	ko00130	12	114	2614	19416	BolC01g035970.2J;BolC02g017680.2J;BolC02g061380.2J;BolC03g015620.2J;BolC04g064970.2J;BolC06g012960.2J;BolC06g027400.2J;BolC06g031350.2J;BolC06g036850.2J;BolC07g056590.2J;Brassica_oleracea_newGene_3830;Brassica_oleracea_newGene_488	K23094+K03809+K01904+K03809+K23095+K01904+K12502+K02552+K01904+K09834+K12501+K12501	Down
Phenylpropanoid biosynthesis	ko00940	76	734	2614	19416	BolC01g001190.2J;BolC01g002610.2J;BolC01g014030.2J;BolC01g015310.2J;BolC01g025590.2J;BolC01g029800.2J;BolC01g044800.2J;BolC01g051810.2J;BolC02g006520.2J;BolC02g010990.2J;BolC02g033640.2J;BolC02g033760.2J;BolC02g050270.2J;BolC02g053890.2J;BolC02g061380.2J;BolC03g013050.2J;BolC03g013060.2J;BolC03g013600.2J;BolC03g015780.2J;BolC03g023940.2J;BolC03g028380.2J;BolC03g039180.2J;BolC03g066600.2J;BolC03g0…	K00083+K09755+K22395+K00430+K13065+K00430+K05350+K00430+K09753+K05349+K18368+K13066+K09753+K00430+K01904+K01188+K01188+K13065+K13066+K09753+K01188+K23260+K05349+K00588+K00083+K00083+K00588+K00430+K09753+K01188+K10775+K18368+K01188+K00430+K00430+K05350+K09753+K01188+K13068+K00083+K10775+K01904+K13066+K23260+K01904+K00430+K00083+K01188+K01188+K01188+K01188+K01188+K01188+K13066+K22395+K01188+K22395+…	Down
Mismatch repair	ko03430	22	513	2614	19416	BolC01g010740.2J;BolC02g023770.2J;BolC02g033670.2J;BolC03g034600.2J;BolC03g045590.2J;BolC03g056880.2J;BolC04g065560.2J;BolC05g006490.2J;BolC05g008520.2J;BolC05g011950.2J;BolC05g020050.2J;BolC06g029760.2J;BolC07g012310.2J;BolC07g039730.2J;BolC07g052260.2J;BolC07g053910.2J;BolC08g026890.2J;Brassica_oleracea_newGene_1661;Brassica_oleracea_newGene_2714;Brassica_oleracea_newGene_4694;Brassica_oleracea…	K07466+K07456+K10756+K08737+K08735+K02327+K02328+K02327+K07466+K10755+K10755+K10756+K08737+K10756+K08736+K07466+K10746+K07466+K07466+K07466+K07466+K07466	Down
Spliceosome	ko03040	47	672	2614	19416	BolC01g004370.2J;BolC01g015530.2J;BolC01g018660.2J;BolC01g034300.2J;BolC01g039180.2J;BolC01g050320.2J;BolC01g052800.2J;BolC01g053680.2J;BolC02g003930.2J;BolC02g025980.2J;BolC02g039480.2J;BolC02g052500.2J;BolC02g062400.2J;BolC03g003880.2J;BolC03g008510.2J;BolC03g010450.2J;BolC03g017800.2J;BolC03g028230.2J;BolC03g046770.2J;BolC03g055790.2J;BolC03g057890.2J;BolC04g007640.2J;BolC04g045590.2J;BolC04g0…	K12900+K03283+K03283+K03283+K12819+K03283+K03283+K11087+K12833+K12835+K12845+K12885+K12833+K12859+K12811+K12885+K12834+K12820+K03283+K12833+K12867+K12829+K12897+K12823+K03283+K12842+K03283+K12831+K12896+K12741+K12625+K12860+K12842+K12626+K12835+K12900+K12900+K03283+K12741+K12741+K12867+K03283+K12837+K12811+K12812+K03283+K03283	Down
Thiamine metabolism	ko00730	13	46	2614	19416	BolC01g025890.2J;BolC03g022040.2J;BolC03g035590.2J;BolC03g040790.2J;BolC03g064070.2J;BolC04g020410.2J;BolC05g010480.2J;BolC05g055500.2J;BolC07g037130.2J;BolC07g043580.2J;BolC08g012270.2J;BolC09g004230.2J;BolC09g009840.2J	K01662+K00939+K00939+K20896+K14394+K03147+K22911+K20896+K00939+K22911+K00939+K00939+K04487	Down
Arachidonic acid metabolism	ko00590	10	77	2614	19416	BolC01g000670.2J;BolC03g026330.2J;BolC04g017810.2J;BolC04g053700.2J;BolC04g053710.2J;BolC04g053720.2J;BolC04g053740.2J;BolC07g001880.2J;BolC07g056220.2J;BolC09g001760.2J	K18592+K00432+K00432+K08726+K08726+K08726+K08726+K01047+K00432+K08726	Down
Photosynthesis	ko00195	60	247	2614	19416	BolC01g006890.2J;BolC01g010440.2J;BolC01g010560.2J;BolC01g014470.2J;BolC01g014490.2J;BolC01g036290.2J;BolC01g057540.2J;BolC02g023760.2J;BolC02g034970.2J;BolC02g063540.2J;BolC02g063560.2J;BolC03g031540.2J;BolC03g033140.2J;BolC03g033660.2J;BolC03g056790.2J;BolC03g071620.2J;BolC03g084160.2J;BolC04g008510.2J;BolC04g019270.2J;BolC04g026650.2J;BolC04g026740.2J;BolC04g036730.2J;BolC04g042160.2J;BolC04g0…	K02109+K02693+K08903+K08901+K08901+K02639+K08901+K02723+K03541+K02641+K02641+K02113+K02115+K02636+K02701+K02698+K02695+K02717+K02721+K02639+K02639+K02717+K02699+K02639+K02717+K02721+K02721+K14332+K02639+K08901+K02717+K02698+K02641+K02695+K08901+K03542+K02695+K08905+K02723+K02638+K08901+K02641+K02716+K02716+K08902+K03542+K02699+K02693+K02639+K02641+K02638+K08901+K02717+K02716+K02641+K02639+K02641+…	Down
Fatty acid degradation	ko00071	18	107	2614	19416	BolC01g002580.2J;BolC01g004630.2J;BolC01g015470.2J;BolC02g055850.2J;BolC03g027480.2J;BolC03g027500.2J;BolC03g028210.2J;BolC03g061260.2J;BolC03g074650.2J;BolC03g075060.2J;BolC04g040560.2J;BolC04g068410.2J;BolC05g020750.2J;BolC05g033660.2J;BolC07g058670.2J;BolC08g049000.2J;BolC09g016220.2J;BolC09g024020.2J	K00128+K00128+K00121+K07513+K20495+K20495+K01897+K00128+K00128+K00128+K18880+K01897+K00121+K01897+K00128+K00001+K01897+K00121	Down
Histidine metabolism	ko00340	14	73	2614	19416	BolC01g002580.2J;BolC01g004630.2J;BolC01g021800.2J;BolC02g028580.2J;BolC03g021390.2J;BolC03g061260.2J;BolC03g072440.2J;BolC03g074650.2J;BolC03g075060.2J;BolC05g035450.2J;BolC05g040150.2J;BolC06g043360.2J;BolC07g058670.2J;BolC09g008970.2J	K00128+K00128+K01663+K00817+K01814+K00128+K18649+K00128+K00128+K01590+K01693+K00817+K00128+K00013	Down
Sphingolipid metabolism	ko00600	19	179	2614	19416	BolC01g020740.2J;BolC01g032390.2J;BolC02g041490.2J;BolC03g003950.2J;BolC03g003960.2J;BolC03g020430.2J;BolC03g069710.2J;BolC04g021840.2J;BolC04g058820.2J;BolC04g067910.2J;BolC05g030450.2J;BolC05g052790.2J;BolC06g001090.2J;BolC06g039330.2J;BolC07g058720.2J;BolC08g053880.2J;BolC09g068630.2J;BolC09g069670.2J;BolC09g069690.2J	K12309+K12309+K17108+K07407+K07407+K12382+K01634+K12309+K12309+K04718+K04708+K12309+K12309+K12309+K12309+K04710+K12309+K12382+K12382	Down
SNARE interactions in vesicular transport	ko04130	11	107	2614	19416	BolC01g037740.2J;BolC03g008570.2J;BolC03g041180.2J;BolC04g040050.2J;BolC05g010920.2J;BolC05g054840.2J;BolC05g061680.2J;BolC07g012260.2J;BolC07g017350.2J;BolC09g056370.2J;BolC09g063950.2J	K08490+K08488+K08486+K08486+K08517+K08486+K08486+K08490+K08500+K08488+K08486	Down
Monobactam biosynthesis	ko00261	9	35	2614	19416	BolC01g013420.2J;BolC01g027020.2J;BolC02g017330.2J;BolC03g006860.2J;BolC03g048340.2J;BolC05g017810.2J;BolC05g039450.2J;BolC08g025390.2J;BolC08g028360.2J	K12524+K13811+K00928+K00928+K13811+K13811+K13811+K00133+K13811	Down
Brassinosteroid biosynthesis	ko00905	5	28	2614	19416	BolC03g008020.2J;BolC06g029530.2J;BolC06g046400.2J;BolC07g036870.2J;BolC09g057210.2J	K09591+K09591+K15639+K12640+K09591	Down
Valine, leucine and isoleucine degradation	ko00280	24	135	2614	19416	BolC01g002580.2J;BolC01g004630.2J;BolC01g025400.2J;BolC01g046660.2J;BolC02g040420.2J;BolC02g055850.2J;BolC02g062080.2J;BolC03g029420.2J;BolC03g031120.2J;BolC03g044650.2J;BolC03g061260.2J;BolC03g074650.2J;BolC03g075060.2J;BolC04g041750.2J;BolC05g007100.2J;BolC05g007900.2J;BolC05g039630.2J;BolC05g050100.2J;BolC06g002320.2J;BolC07g055820.2J;BolC07g058670.2J;BolC08g033700.2J;BolC08g056630.2J;BolC09g0…	K00128+K00128+K00382+K18660+K01641+K07513+K00020+K01640+K00020+K00382+K00128+K00128+K00128+K05605+K05605+K00826+K01968+K18660+K00382+K01968+K00128+K00826+K05605+K01641	Down
Glycine, serine and threonine metabolism	ko00260	51	209	2614	19416	BolC01g001230.2J;BolC01g004680.2J;BolC01g005590.2J;BolC01g013420.2J;BolC01g025400.2J;BolC01g028250.2J;BolC01g036380.2J;BolC02g017330.2J;BolC02g032760.2J;BolC02g036130.2J;BolC02g063530.2J;BolC03g006860.2J;BolC03g044650.2J;BolC03g046240.2J;BolC03g061010.2J;BolC03g073550.2J;BolC03g075090.2J;BolC03g081120.2J;BolC04g013540.2J;BolC04g013870.2J;BolC04g041220.2J;BolC04g044080.2J;BolC05g009350.2J;BolC05g0…	K00600+K00058+K00281+K12524+K00382+K15634+K00605+K00928+K15634+K15918+K00276+K00928+K00382+K00058+K00130+K00600+K00831+K00600+K02437+K02437+K00600+K06001+K01696+K14272+K02437+K02437+K15633+K01620+K00382+K15918+K00600+K14272+K00600+K15919+K14272+K01696+K00058+K00276+K00600+K02437+K15633+K00605+K00133+K00058+K01695+K15919+K00605+K01620+K01695+K01733+K00003	Down
Protein export	ko03060	25	197	2614	19416	BolC01g025540.2J;BolC01g047110.2J;BolC02g001640.2J;BolC02g020150.2J;BolC02g027310.2J;BolC03g016670.2J;BolC03g018540.2J;BolC03g047110.2J;BolC03g084330.2J;BolC04g007160.2J;BolC04g007170.2J;BolC04g007900.2J;BolC04g059870.2J;BolC04g066500.2J;BolC04g067640.2J;BolC05g034690.2J;BolC06g003350.2J;BolC06g007400.2J;BolC06g019890.2J;BolC07g030860.2J;BolC07g039440.2J;BolC08g029550.2J;BolC09g005010.2J;BolC09g0…	K10956+K13280+K03106+K03116+K09648+K03116+K09490+K12275+K13280+K03110+K03110+K12947+K10956+K03104+K03110+K03105+K03106+K13280+K09490+K03118+K12948+K03070+K03116+K03106+K09481	Down
Stilbenoid, diarylheptanoid and gingerol biosynthesis	ko00945	5	72	2614	19416	BolC01g025590.2J;BolC03g013600.2J;BolC03g068600.2J;BolC03g080010.2J;BolC07g057420.2J	K13065+K13065+K00588+K00588+K00588	Down
N-Glycan biosynthesis	ko00510	15	135	2614	19416	BolC01g032490.2J;BolC01g037500.2J;BolC03g000870.2J;BolC03g001980.2J;BolC03g011100.2J;BolC04g008330.2J;BolC04g021130.2J;BolC04g034980.2J;BolC05g014470.2J;BolC05g030440.2J;BolC06g036090.2J;BolC07g035220.2J;BolC08g026070.2J;BolC08g026480.2J;BolC09g068640.2J	K00902+K12669+K03850+K03844+K12668+K00729+K00729+K01001+K03844+K12668+K00737+K00737+K03844+K01230+K07252	Down
mRNA surveillance pathway	ko03015	27	349	2614	19416	BolC01g022710.2J;BolC01g033130.2J;BolC02g005690.2J;BolC03g009560.2J;BolC03g014770.2J;BolC03g025880.2J;BolC03g031010.2J;BolC03g037690.2J;BolC03g042000.2J;BolC03g066300.2J;BolC03g071790.2J;BolC04g004100.2J;BolC04g008020.2J;BolC04g020870.2J;BolC04g050650.2J;BolC04g063250.2J;BolC05g000370.2J;BolC06g013030.2J;BolC07g021120.2J;BolC07g052870.2J;BolC08g036350.2J;BolC08g047890.2J;BolC09g026950.2J;BolC09g0…	K06965+K11583+K15542+K11583+K11584+K04382+K14399+K06269+K14396+K06269+K14411+K04382+K06269+K06269+K13126+K14404+K14399+K04354+K14399+K14411+K13126+K13126+K14411+K14396+K11584+K12812+K13126	Down
Pentose phosphate pathway	ko00030	39	156	2614	19416	BolC01g009960.2J;BolC01g009980.2J;BolC01g019030.2J;BolC01g019040.2J;BolC01g021210.2J;BolC02g049080.2J;BolC03g006280.2J;BolC03g072260.2J;BolC04g032090.2J;BolC04g038080.2J;BolC04g048770.2J;BolC04g051550.2J;BolC04g061680.2J;BolC05g010820.2J;BolC05g018960.2J;BolC05g021540.2J;BolC05g056520.2J;BolC05g060810.2J;BolC05g062700.2J;BolC06g020260.2J;BolC07g027120.2J;BolC07g031010.2J;BolC07g041730.2J;BolC07g0…	K00850+K00850+K01810+K01810+K01623+K01807+K00036+K01623+K00615+K03841+K01623+K00131+K00850+K00895+K00895+K01835+K00850+K01807+K00033+K00850+K01810+K01807+K01057+K01057+K01783+K01623+K00036+K00895+K01835+K00850+K03841+K00615+K00131+K00850+K01623+K01057+K01835+K00036+K00850	Down
Isoflavonoid biosynthesis	ko00943	2	29	2614	19416	BolC01g001710.2J;BolC04g006870.2J	K13260+K13265	Down
Peroxisome	ko04146	41	276	2614	19416	BolC01g004950.2J;BolC01g025310.2J;BolC01g038440.2J;BolC01g044760.2J;BolC01g048330.2J;BolC01g048340.2J;BolC01g048610.2J;BolC01g051760.2J;BolC02g020450.2J;BolC02g020460.2J;BolC02g055850.2J;BolC03g010520.2J;BolC03g017470.2J;BolC03g028210.2J;BolC03g029420.2J;BolC03g042080.2J;BolC03g043110.2J;BolC03g049410.2J;BolC03g056940.2J;BolC03g070420.2J;BolC03g080310.2J;BolC04g007880.2J;BolC04g035690.2J;BolC04g0…	K13356+K05677+K13346+K13336+K11517+K11517+K11517+K04564+K03781+K03781+K07513+K03426+K04564+K01897+K01640+K13237+K11517+K13348+K01578+K17879+K13356+K13354+K13342+K08726+K08726+K08726+K08726+K13348+K01897+K01897+K11517+K11517+K11517+K13354+K13348+K00106+K00106+K08726+K01897+K04565+K04565	Down
Other glycan degradation	ko00511	19	140	2614	19416	BolC01g004610.2J;BolC01g020740.2J;BolC01g032390.2J;BolC02g041490.2J;BolC03g006740.2J;BolC04g021840.2J;BolC04g058820.2J;BolC05g013090.2J;BolC05g052790.2J;BolC05g060400.2J;BolC06g001090.2J;BolC06g037000.2J;BolC06g039330.2J;BolC07g058720.2J;BolC08g058620.2J;BolC09g021830.2J;BolC09g058710.2J;BolC09g068630.2J;Brassica_oleracea_newGene_7090	K15923+K12309+K12309+K17108+K01191+K12309+K12309+K01191+K12309+K01206+K12309+K12373+K12309+K12309+K12373+K01206+K01206+K12309+K15923	Down
C5-Branched dibasic acid metabolism	ko00660	3	26	2614	19416	BolC02g035990.2J;BolC04g058040.2J;BolC08g008400.2J	K00052+K01653+K01703	Down
Propanoate metabolism	ko00640	15	126	2614	19416	BolC01g025400.2J;BolC02g003320.2J;BolC03g003890.2J;BolC03g008340.2J;BolC03g022670.2J;BolC03g044650.2J;BolC03g056940.2J;BolC04g041750.2J;BolC05g007100.2J;BolC06g002320.2J;BolC07g046830.2J;BolC08g009970.2J;BolC08g056170.2J;BolC08g056630.2J;BolC09g015620.2J	K00382+K01899+K01899+K02160+K01962+K00382+K01578+K05605+K05605+K00382+K00016+K11262+K01961+K05605+K01900	Down
Glycosylphosphatidylinositol (GPI)-anchor biosynthesis	ko00563	8	70	2614	19416	BolC01g052460.2J;BolC02g006610.2J;BolC03g007280.2J;BolC03g007340.2J;BolC03g027440.2J;BolC03g051340.2J;BolC06g046960.2J;Brassica_oleracea_newGene_9287	K03860+K05286+K03860+K03860+K05283+K03860+K03860+K03860	Down
Sesquiterpenoid and triterpenoid biosynthesis	ko00909	8	85	2614	19416	BolC01g001390.2J;BolC01g004150.2J;BolC01g004160.2J;BolC03g079560.2J;BolC06g028970.2J;BolC06g049900.2J;BolC07g057790.2J;BolC07g057800.2J	K00511+K00801+K00801+K00801+K15815+K15815+K00801+K00801	Down
Arginine and proline metabolism	ko00330	25	204	2614	19416	BolC01g002580.2J;BolC01g004630.2J;BolC01g007040.2J;BolC01g056980.2J;BolC02g009850.2J;BolC02g054690.2J;BolC03g003800.2J;BolC03g006580.2J;BolC03g036210.2J;BolC03g045240.2J;BolC03g061260.2J;BolC03g074650.2J;BolC03g075060.2J;BolC03g079450.2J;BolC03g080190.2J;BolC04g047950.2J;BolC07g005140.2J;BolC07g019890.2J;BolC07g057830.2J;BolC07g058670.2J;BolC08g028570.2J;BolC08g039650.2J;BolC08g056830.2J;BolC09g0…	K00128+K00128+K00811+K01611+K14454+K14329+K10536+K13366+K01611+K00472+K00128+K00128+K00128+K01583+K00472+K14329+K00472+K00797+K01583+K00128+K00472+K12657+K01426+K01611+K00286	Down
Porphyrin and chlorophyll metabolism	ko00860	36	121	2614	19416	BolC01g012110.2J;BolC01g016420.2J;BolC01g020090.2J;BolC01g027330.2J;BolC01g034710.2J;BolC01g051800.2J;BolC02g003310.2J;BolC02g014340.2J;BolC02g031040.2J;BolC02g043980.2J;BolC02g046190.2J;BolC03g002100.2J;BolC03g006560.2J;BolC03g029600.2J;BolC03g057300.2J;BolC03g078350.2J;BolC04g064550.2J;BolC05g001110.2J;BolC05g014380.2J;BolC05g017390.2J;BolC05g026630.2J;BolC06g000290.2J;BolC06g045920.2J;BolC07g0…	K03405+K22013+K13071+K04040+K02492+K13544+K01749+K13544+K10960+K08099+K03405+K13606+K03403+K13071+K01845+K22013+K01599+K00231+K01845+K08099+K21480+K22013+K10960+K01772+K13544+K03405+K03428+K13544+K13544+K04035+K02492+K01845+K02492+K02259+K19073+K01749	Down
Biosynthesis of amino acids	ko01230	158	701	2614	19416	BolC01g000540.2J;BolC01g001230.2J;BolC01g001450.2J;BolC01g003640.2J;BolC01g004680.2J;BolC01g007040.2J;BolC01g009960.2J;BolC01g009980.2J;BolC01g013420.2J;BolC01g021210.2J;BolC01g021800.2J;BolC01g026690.2J;BolC01g028250.2J;BolC01g029710.2J;BolC01g050130.2J;BolC01g054340.2J;BolC01g055690.2J;BolC01g056700.2J;BolC02g007550.2J;BolC02g008490.2J;BolC02g008560.2J;BolC02g009850.2J;BolC02g011820.2J;BolC02g0…	K00891+K00600+K14682+K00030+K00058+K00811+K00850+K00850+K12524+K01623+K01663+K01738+K15634+K00873+K00927+K13832+K00134+K13832+K01915+K00549+K00766+K14454+K05359+K00928+K01915+K00549+K00817+K15634+K00927+K00818+K00052+K01807+K00873+K01953+K01586+K00928+K00549+K13832+K01814+K01689+K00789+K00800+K13832+K00549+K00927+K00789+K00058+K01609+K01681+K00640+K01953+K01953+K01623+K18649+K00600+K00831+K10206+…	Down
Nitrogen metabolism	ko00910	19	133	2614	19416	BolC01g001500.2J;BolC01g057480.2J;BolC01g057510.2J;BolC02g006420.2J;BolC02g007550.2J;BolC02g007880.2J;BolC02g022220.2J;BolC02g027190.2J;BolC03g080440.2J;BolC04g042400.2J;BolC04g043330.2J;BolC05g062140.2J;BolC06g029570.2J;BolC06g041790.2J;BolC08g012040.2J;BolC08g036780.2J;BolC09g011880.2J;BolC09g056690.2J;BolC09g067870.2J	K01455+K01673+K01673+K02575+K01915+K00366+K01915+K01673+K01673+K01915+K01915+K01673+K10534+K01673+K01915+K01674+K00366+K01915+K00284	Down
Galactose metabolism	ko00052	39	419	2614	19416	BolC01g009960.2J;BolC01g009980.2J;BolC01g020740.2J;BolC01g032390.2J;BolC01g044890.2J;BolC02g033580.2J;BolC03g003950.2J;BolC03g003960.2J;BolC03g005470.2J;BolC03g008880.2J;BolC03g008900.2J;BolC03g044560.2J;BolC04g001200.2J;BolC04g021840.2J;BolC04g058820.2J;BolC04g061680.2J;BolC04g068370.2J;BolC05g021540.2J;BolC05g052790.2J;BolC05g056520.2J;BolC05g063380.2J;BolC06g001090.2J;BolC06g005160.2J;BolC06g0…	K00850+K00850+K12309+K12309+K01785+K12447+K07407+K07407+K01187+K00963+K00963+K12447+K18819+K12309+K12309+K00850+K18819+K01835+K12309+K00850+K00963+K12309+K00844+K01193+K00850+K12309+K12309+K01835+K00850+K12447+K00850+K01193+K18819+K00844+K01784+K18819+K01835+K00850+K12309	Down
Pentose and glucuronate interconversions	ko00040	52	694	2614	19416	BolC01g017270.2J;BolC01g017320.2J;BolC01g029640.2J;BolC01g051910.2J;BolC01g051950.2J;BolC02g003830.2J;BolC02g003850.2J;BolC02g006980.2J;BolC02g019250.2J;BolC02g033230.2J;BolC02g033580.2J;BolC02g045910.2J;BolC02g050730.2J;BolC02g054340.2J;BolC02g056100.2J;BolC03g004340.2J;BolC03g008880.2J;BolC03g008900.2J;BolC03g022350.2J;BolC03g035710.2J;BolC03g043090.2J;BolC03g044560.2J;BolC03g044620.2J;BolC03g0…	K01184+K01184+K01051+K01051+K01051+K01051+K01051+K00012+K01051+K01051+K12447+K01728+K01213+K01051+K01184+K01051+K00963+K00963+K00002+K16190+K01051+K12447+K01213+K01051+K01051+K00002+K01728+K00012+K01728+K01051+K00963+K01213+K01051+K01051+K00012+K01184+K01728+K01051+K01184+K01783+K01184+K01051+K01051+K12447+K22935+K01728+K01184+K01184+K01051+K01051+K01051+K00012	Down
Endocytosis	ko04144	71	615	2614	19416	BolC01g003520.2J;BolC01g011320.2J;BolC01g015530.2J;BolC01g018660.2J;BolC01g026060.2J;BolC01g034300.2J;BolC01g047090.2J;BolC01g050320.2J;BolC01g052800.2J;BolC01g053320.2J;BolC01g053430.2J;BolC01g054950.2J;BolC02g027250.2J;BolC02g029870.2J;BolC02g046900.2J;BolC02g049470.2J;BolC02g058380.2J;BolC03g022180.2J;BolC03g031560.2J;BolC03g040330.2J;BolC03g046770.2J;BolC03g055290.2J;BolC03g061360.2J;BolC03g0…	K18442+K12493+K03283+K03283+K19366+K03283+K01115+K03283+K03283+K04646+K12486+K10364+K07937+K12197+K11826+K12486+K12472+K12492+K07897+K12198+K03283+K05754+K18467+K07904+K18467+K19476+K07897+K07937+K12492+K12196+K07901+K04645+K01115+K12489+K10396+K03283+K07897+K07937+K03283+K12486+K00889+K07901+K19476+K11827+K12197+K07937+K19476+K19366+K07937+K07904+K12486+K12486+K12472+K12188+K12486+K19366+K03283+…	Down
Caffeine metabolism	ko00232	3	6	2614	19416	BolC07g014030.2J;BolC09g001620.2J;BolC09g001630.2J	K00365+K00106+K00106	Down
MAPK signaling pathway - plant	ko04016	110	1141	2614	19416	BolC01g001850.2J;BolC01g005150.2J;BolC01g007580.2J;BolC01g009360.2J;BolC01g017950.2J;BolC01g019540.2J;BolC01g021770.2J;BolC01g044260.2J;BolC01g048120.2J;BolC02g000300.2J;BolC02g008800.2J;BolC02g011210.2J;BolC02g013230.2J;BolC02g013240.2J;BolC02g019480.2J;BolC02g020450.2J;BolC02g020460.2J;BolC02g037030.2J;BolC02g040980.2J;BolC02g049250.2J;BolC02g055170.2J;BolC03g000060.2J;BolC03g006140.2J;BolC03g0…	K20716+K17686+K13425+K20603+K13416+K20728+K20716+K20725+K13420+K14497+K13420+K02183+K16224+K16224+K14496+K03781+K03781+K13425+K00940+K20538+K13447+K20600+K02183+K02183+K16224+K16224+K16224+K13424+K02183+K13413+K14514+K17686+K13449+K14498+K20718+K02183+K02183+K20536+K20557+K17686+K13425+K20728+K00940+K13422+K13424+K16224+K13416+K02183+K02183+K02183+K13422+K13422+K13422+K20716+K20716+K13413+K20557+…	Down
Monoterpenoid biosynthesis	ko00902	4	13	2614	19416	BolC01g013940.2J;BolC05g000220.2J;BolC07g033690.2J;BolC08g044320.2J	K15095+K15095+K07385+K15095	Down
Carbon fixation in photosynthetic organisms	ko00710	60	278	2614	19416	BolC01g021210.2J;BolC01g050130.2J;BolC01g055690.2J;BolC02g003780.2J;BolC02g004910.2J;BolC02g009850.2J;BolC02g014320.2J;BolC02g035330.2J;BolC02g049080.2J;BolC02g052580.2J;BolC03g005440.2J;BolC03g042070.2J;BolC03g072260.2J;BolC03g085030.2J;BolC04g032090.2J;BolC04g036310.2J;BolC04g036600.2J;BolC04g038080.2J;BolC04g043920.2J;BolC04g043960.2J;BolC04g047760.2J;BolC04g048600.2J;BolC04g048770.2J;BolC04g0…	K01623+K00927+K00134+K00026+K00029+K14454+K00051+K00927+K01807+K05298+K00029+K00927+K01623+K01595+K00615+K01100+K01803+K03841+K01602+K01602+K01602+K01803+K01623+K01595+K05298+K00134+K14272+K00855+K00855+K00927+K01807+K00026+K00026+K01595+K01595+K01602+K01100+K00134+K00029+K14272+K14272+K01807+K05298+K00029+K01783+K01623+K00025+K05298+K00855+K00134+K03841+K01803+K01100+K00615+K01623+K01803+K05298+…	Down
Arginine biosynthesis	ko00220	18	108	2614	19416	BolC01g001450.2J;BolC01g007040.2J;BolC02g007550.2J;BolC02g009850.2J;BolC02g022220.2J;BolC02g023590.2J;BolC02g035950.2J;BolC04g042400.2J;BolC04g043330.2J;BolC04g062380.2J;BolC05g021660.2J;BolC06g042010.2J;BolC07g020180.2J;BolC08g012040.2J;BolC09g017670.2J;BolC09g056690.2J;Brassica_oleracea_newGene_1252;Brassica_oleracea_newGene_5992	K14682+K00811+K01915+K14454+K01915+K01427+K00818+K01915+K01915+K00620+K14272+K14272+K14272+K01915+K00145+K01915+K01940+K01940	Down
Homologous recombination	ko03440	21	620	2614	19416	BolC01g010740.2J;BolC02g032250.2J;BolC03g020480.2J;BolC03g056880.2J;BolC03g072080.2J;BolC04g065560.2J;BolC05g006490.2J;BolC05g008520.2J;BolC05g015860.2J;BolC07g053910.2J;BolC08g016260.2J;BolC08g022400.2J;BolC08g055630.2J;BolC09g030890.2J;Brassica_oleracea_newGene_1661;Brassica_oleracea_newGene_2714;Brassica_oleracea_newGene_4694;Brassica_oleracea_newGene_4766;Brassica_oleracea_newGene_4775;Brassi…	K07466+K12173+K03655+K02327+K12173+K02328+K02327+K07466+K12173+K07466+K10875+K10901+K10901+K08991+K07466+K07466+K07466+K10881+K10881+K07466+K07466	Down
Oxidative phosphorylation	ko00190	89	573	2614	19416	BolC01g000240.2J;BolC01g004690.2J;BolC01g006610.2J;BolC01g006640.2J;BolC01g006890.2J;BolC01g017930.2J;BolC01g019440.2J;BolC01g044450.2J;BolC01g045820.2J;BolC01g047190.2J;BolC01g047200.2J;BolC01g056510.2J;BolC01g057590.2J;BolC02g005660.2J;BolC02g008980.2J;BolC02g021740.2J;BolC02g036280.2J;BolC02g038080.2J;BolC02g040880.2J;BolC03g004160.2J;BolC03g004310.2J;BolC03g004330.2J;BolC03g005530.2J;BolC03g0…	K02155+K02144+K03661+K00417+K02109+K02152+K03955+K03966+K02155+K02265+K02265+K03939+K02152+K02137+K03952+K03955+K02265+K02151+K02150+K02133+K01507+K01507+K03940+K02137+K03952+K02136+K02113+K02115+K02151+K02152+K03955+K02155+K02133+K02155+K02154+K02266+K02155+K03661+K02136+K02149+K03934+K02154+K02136+K01507+K02148+K03941+K02155+K02147+K03955+K02152+K02149+K03941+K02147+K02145+K01507+K02267+K02147+…	Down
Flavone and flavonol biosynthesis	ko00944	2	6	2614	19416	BolC02g007850.2J;BolC09g064000.2J	K10757+K05280	Down
Plant hormone signal transduction	ko04075	124	1153	2614	19416	BolC01g001980.2J;BolC01g002280.2J;BolC01g006520.2J;BolC01g011540.2J;BolC01g016010.2J;BolC01g017950.2J;BolC01g020230.2J;BolC01g028740.2J;BolC01g030460.2J;BolC01g038020.2J;BolC01g039620.2J;BolC01g044930.2J;BolC01g047380.2J;BolC02g000300.2J;BolC02g003970.2J;BolC02g005590.2J;BolC02g010840.2J;BolC02g015140.2J;BolC02g019480.2J;BolC02g020120.2J;BolC02g029390.2J;BolC02g031300.2J;BolC02g034760.2J;BolC02g0…	K14506+K14494+K13464+K14500+K14488+K13416+K14504+K14505+K14492+K14491+K14484+K13464+K14484+K14497+K14431+K14487+K14486+K14504+K14496+K14494+K13464+K13464+K14503+K14517+K13415+K14494+K13415+K13946+K13413+K14488+K14514+K12126+K13946+K12126+K14484+K13449+K14498+K14506+K14505+K13464+K14494+K14486+K13422+K13416+K14502+K14486+K14494+K13415+K14500+K14490+K13422+K14484+K13422+K13422+K13415+K13413+K13415+…	Down
Biosynthesis of unsaturated fatty acids	ko01040	11	46	2614	19416	BolC02g013070.2J;BolC02g023750.2J;BolC02g055850.2J;BolC03g004740.2J;BolC03g026600.2J;BolC04g005040.2J;BolC05g024550.2J;BolC06g038950.2J;BolC07g017840.2J;BolC08g039280.2J;BolC09g062230.2J	K10703+K10251+K07513+K10703+K03921+K03921+K10251+K10251+K10251+K10258+K10703	Down
Basal transcription factors	ko03022	8	125	2614	19416	BolC02g040890.2J;BolC03g032870.2J;BolC03g070830.2J;BolC04g003270.2J;BolC06g044150.2J;BolC07g016030.2J;BolC07g051370.2J;BolC09g008540.2J	K03137+K03138+K03120+K03124+K10844+K03120+K03123+K03122	Down
Lysine biosynthesis	ko00300	8	54	2614	19416	BolC01g013420.2J;BolC02g017330.2J;BolC03g005590.2J;BolC03g006860.2J;BolC03g080360.2J;BolC08g025390.2J;BolC09g051340.2J;BolC09g060870.2J	K12524+K00928+K01586+K00928+K10206+K00133+K00003+K01586	Down
Tropane, piperidine and pyridine alkaloid biosynthesis	ko00960	17	116	2614	19416	BolC01g007040.2J;BolC02g002490.2J;BolC02g009850.2J;BolC02g028580.2J;BolC02g063530.2J;BolC04g020890.2J;BolC04g020900.2J;BolC04g020940.2J;BolC04g020970.2J;BolC04g049410.2J;BolC04g055740.2J;BolC06g043360.2J;BolC07g058560.2J;BolC08g002820.2J;BolC08g002850.2J;BolC08g002860.2J;BolC08g048660.2J	K00811+K08081+K14454+K00817+K00276+K08081+K08081+K08081+K08081+K15849+K08081+K00817+K00276+K08081+K08081+K08081+K15849	Down
Lipoic acid metabolism	ko00785	2	7	2614	19416	BolC03g003990.2J;BolC08g049610.2J	K03644+K03644	Down
RNA degradation	ko03018	48	645	2614	19416	BolC01g009960.2J;BolC01g009980.2J;BolC01g042120.2J;BolC01g048630.2J;BolC02g011500.2J;BolC02g035810.2J;BolC03g002830.2J;BolC03g014370.2J;BolC03g019770.2J;BolC03g021550.2J;BolC03g035360.2J;BolC03g036680.2J;BolC03g064550.2J;BolC03g065850.2J;BolC04g012400.2J;BolC04g014870.2J;BolC04g024370.2J;BolC04g043040.2J;BolC04g050650.2J;BolC04g055050.2J;BolC04g060310.2J;BolC04g061680.2J;BolC04g061790.2J;BolC05g0…	K00850+K00850+K12606+K12620+K12581+K12581+K04077+K04077+K04077+K01689+K12614+K00962+K12581+K12590+K01689+K12598+K12619+K07573+K13126+K10643+K12603+K00850+K01689+K12581+K04077+K12603+K00850+K14442+K04077+K00850+K12625+K01689+K04077+K12626+K12608+K01148+K04077+K10643+K13126+K00850+K13126+K00850+K12608+K12581+K04077+K00850+K12608+K13126	Down
Cutin, suberine and wax biosynthesis	ko00073	23	164	2614	19416	BolC01g004950.2J;BolC01g029680.2J;BolC02g005290.2J;BolC02g014790.2J;BolC02g036740.2J;BolC02g042830.2J;BolC03g001920.2J;BolC03g020940.2J;BolC03g027480.2J;BolC03g027500.2J;BolC03g080310.2J;BolC04g010640.2J;BolC04g015690.2J;BolC05g000400.2J;BolC06g017390.2J;BolC06g042110.2J;BolC08g033280.2J;BolC08g061020.2J;BolC09g000310.2J;BolC09g021550.2J;BolC09g021560.2J;BolC09g046340.2J;BolC09g068780.2J	K13356+K15406+K15406+K15404+K15398+K15405+K21995+K15406+K20495+K20495+K13356+K15404+K17991+K15398+K15406+K17991+K15406+K15404+K15398+K15405+K15405+K15404+K15400	Down
Anthocyanin biosynthesis	ko00942	4	21	2614	19416	BolC03g015820.2J;BolC03g015840.2J;BolC03g015860.2J;BolC08g012750.2J	K17193+K17193+K17193+K12338	Down
Carbon metabolism	ko01200	178	784	2614	19416	BolC01g001230.2J;BolC01g001500.2J;BolC01g003640.2J;BolC01g004680.2J;BolC01g005590.2J;BolC01g009960.2J;BolC01g009980.2J;BolC01g015470.2J;BolC01g019030.2J;BolC01g019040.2J;BolC01g021210.2J;BolC01g025400.2J;BolC01g026690.2J;BolC01g028250.2J;BolC01g029710.2J;BolC01g036380.2J;BolC01g048330.2J;BolC01g048340.2J;BolC01g048610.2J;BolC01g050130.2J;BolC01g055690.2J;BolC02g003320.2J;BolC02g003780.2J;BolC02g0…	K00600+K01455+K00030+K00058+K00281+K00850+K00850+K00121+K01810+K01810+K01623+K00382+K01738+K15634+K00873+K00605+K11517+K11517+K11517+K00927+K00134+K01899+K00026+K00029+K14454+K00051+K03781+K03781+K00162+K15634+K00927+K15918+K01807+K05298+K01899+K00873+K00029+K00036+K02160+K01689+K01962+K00927+K00627+K11517+K00382+K00058+K01681+K00640+K00162+K01623+K00600+K00831+K00600+K01595+K00640+K01738+K00297+…	Down
Synthesis and degradation of ketone bodies	ko00072	3	11	2614	19416	BolC02g040420.2J;BolC03g029420.2J;BolC09g031620.2J	K01641+K01640+K01641	Down
Cysteine and methionine metabolism	ko00270	61	354	2614	19416	BolC01g004680.2J;BolC01g007040.2J;BolC01g012760.2J;BolC01g013420.2J;BolC01g026690.2J;BolC01g038340.2J;BolC01g056980.2J;BolC02g003780.2J;BolC02g008490.2J;BolC02g009850.2J;BolC02g017330.2J;BolC02g025710.2J;BolC02g033590.2J;BolC02g043900.2J;BolC03g006860.2J;BolC03g009250.2J;BolC03g021720.2J;BolC03g036210.2J;BolC03g036730.2J;BolC03g044920.2J;BolC03g046240.2J;BolC03g048770.2J;BolC03g053230.2J;BolC03g0…	K00058+K00811+K00558+K12524+K01738+K01251+K01611+K00026+K00549+K14454+K00928+K00549+K05933+K08967+K00928+K00549+K00789+K01611+K00549+K00789+K00058+K01251+K00640+K01244+K00831+K00640+K00789+K01738+K00789+K13034+K01738+K01251+K08963+K00789+K01738+K00826+K01011+K01738+K01739+K00026+K00026+K01011+K00797+K00016+K00058+K00025+K01251+K01738+K00133+K00058+K00826+K01760+K13034+K00547+K01738+K01761+K20772+…	Down
Pyrimidine metabolism	ko00240	25	169	2614	19416	BolC01g004210.2J;BolC02g026220.2J;BolC02g040980.2J;BolC02g057760.2J;BolC03g009370.2J;BolC03g009400.2J;BolC03g021410.2J;BolC03g023300.2J;BolC03g045720.2J;BolC03g086410.2J;BolC04g014100.2J;BolC04g046360.2J;BolC05g011710.2J;BolC05g054070.2J;BolC06g021030.2J;BolC06g030930.2J;BolC07g034690.2J;BolC07g040330.2J;BolC07g050190.2J;BolC08g014220.2J;BolC09g005910.2J;BolC09g024750.2J;BolC09g032570.2J;BolC09g0…	K13998+K01956+K00940+K13800+K14641+K14641+K01240+K24242+K09903+K00940+K01937+K00876+K01510+K01937+K00761+K01081+K10808+K13800+K01465+K03787+K13800+K00940+K00940+K14641+K10807	Down
Phenylalanine metabolism	ko00360	15	135	2614	19416	BolC01g007040.2J;BolC02g009850.2J;BolC02g028580.2J;BolC02g063530.2J;BolC03g000330.2J;BolC04g049410.2J;BolC04g062040.2J;BolC05g056320.2J;BolC06g043360.2J;BolC07g000610.2J;BolC07g058560.2J;BolC08g037230.2J;BolC08g048660.2J;BolC08g056830.2J;BolC09g045740.2J	K00811+K14454+K00817+K00276+K07253+K15849+K10775+K10775+K00817+K01593+K00276+K10775+K15849+K01426+K07253	Down
Nucleotide excision repair	ko03420	22	561	2614	19416	BolC01g010740.2J;BolC02g033670.2J;BolC03g056880.2J;BolC04g022970.2J;BolC04g065560.2J;BolC05g006140.2J;BolC05g006490.2J;BolC05g008520.2J;BolC05g011950.2J;BolC05g013780.2J;BolC05g020050.2J;BolC06g029760.2J;BolC06g044150.2J;BolC06g049090.2J;BolC07g039730.2J;BolC07g053910.2J;BolC08g052090.2J;Brassica_oleracea_newGene_1661;Brassica_oleracea_newGene_2714;Brassica_oleracea_newGene_4694;Brassica_oleracea…	K07466+K10756+K02327+K02326+K02328+K02324+K02327+K07466+K10755+K10839+K10755+K10756+K10844+K10570+K10756+K07466+K10839+K07466+K07466+K07466+K07466+K07466	Down
Terpenoid backbone biosynthesis	ko00900	23	114	2614	19416	BolC01g002180.2J;BolC01g025890.2J;BolC01g056720.2J;BolC02g031040.2J;BolC02g032820.2J;BolC02g040420.2J;BolC02g048670.2J;BolC02g050420.2J;BolC03g013040.2J;BolC03g058330.2J;BolC03g074330.2J;BolC04g014360.2J;BolC05g014620.2J;BolC05g023390.2J;BolC05g043810.2J;BolC06g045920.2J;BolC06g049450.2J;BolC07g030680.2J;BolC09g015830.2J;BolC09g017120.2J;BolC09g031620.2J;BolC09g047510.2J;BolC09g049870.2J	K13789+K01662+K01823+K10960+K00021+K01641+K00787+K00991+K15892+K00099+K13789+K14066+K05356+K06981+K13789+K10960+K05356+K00787+K01770+K01770+K01641+K11778+K03526	Down
Steroid biosynthesis	ko00100	16	88	2614	19416	BolC01g001390.2J;BolC01g004150.2J;BolC01g004160.2J;BolC01g043070.2J;BolC02g005850.2J;BolC02g034350.2J;BolC03g050530.2J;BolC03g079560.2J;BolC03g083190.2J;BolC05g062840.2J;BolC06g020320.2J;BolC07g014060.2J;BolC07g057790.2J;BolC07g057800.2J;BolC08g023040.2J;BolC08g046330.2J	K00511+K00801+K00801+K09828+K00559+K08242+K01853+K00801+K00213+K00227+K00222+K01853+K00801+K00801+K05917+K23558	Down
Tyrosine metabolism	ko00350	16	116	2614	19416	BolC01g007040.2J;BolC01g010540.2J;BolC01g015470.2J;BolC02g009850.2J;BolC02g028580.2J;BolC02g063530.2J;BolC03g000330.2J;BolC04g049410.2J;BolC05g020750.2J;BolC06g043360.2J;BolC07g000610.2J;BolC07g058560.2J;BolC08g048660.2J;BolC08g049000.2J;BolC09g024020.2J;BolC09g045740.2J	K00811+K01592+K00121+K14454+K00817+K00276+K07253+K15849+K00121+K00817+K01593+K00276+K15849+K00001+K00121+K07253	Down
One carbon pool by folate	ko00670	17	57	2614	19416	BolC01g001230.2J;BolC01g004210.2J;BolC01g036380.2J;BolC03g041770.2J;BolC03g073550.2J;BolC03g081120.2J;BolC04g005400.2J;BolC04g041220.2J;BolC05g054300.2J;BolC06g025320.2J;BolC06g030250.2J;BolC06g033950.2J;BolC06g042720.2J;BolC08g007850.2J;BolC08g023150.2J;BolC08g043230.2J;BolC08g055130.2J	K00600+K13998+K00605+K00288+K00600+K00600+K00297+K00600+K00288+K00297+K01934+K00600+K00600+K00600+K00605+K00297+K00605	Down
Taurine and hypotaurine metabolism	ko00430	3	37	2614	19416	BolC01g000670.2J;BolC03g008920.2J;BolC09g055950.2J	K18592+K01580+K01580	Down

## Sheet: CK vs H12
Table S6. Statistical analysis of KEGG enrichment results for differentially expressed genes.
Pathway	ko_ID	DEgene	gene	DEgene_all	gene_all	Gene_id	KOs	Up/Down
Fatty acid elongation	ko00062	4	75	2202	19416	BolC01g025070.2J;BolC05g000310.2J;BolC06g025470.2J;BolC07g045100.2J	K15397+K01068+K01074+K15397	Up
Glycerolipid metabolism	ko00561	26	284	2202	19416	BolC01g012790.2J;BolC01g013600.2J;BolC02g005810.2J;BolC02g052390.2J;BolC03g085520.2J;BolC04g010560.2J;BolC04g012570.2J;BolC04g015640.2J;BolC05g000390.2J;BolC05g002300.2J;BolC05g030420.2J;BolC05g048270.2J;BolC05g051240.2J;BolC05g056910.2J;BolC06g008960.2J;BolC06g033980.2J;BolC07g002350.2J;BolC07g044710.2J;BolC07g048210.2J;BolC07g048690.2J;BolC08g005290.2J;BolC08g007590.2J;BolC08g031420.2J;BolC09g0…	K00901+K00655+K00679+K07407+K14085+K00002+K00002+K00655+K13508+K00679+K00630+K00863+K00655+K15728+K00679+K00679+K11155+K22848+K00679+K00655+K22849+K00128+K00128+K09480+K01054+K14674	Up
Tryptophan metabolism	ko00380	23	212	2202	19416	BolC01g003780.2J;BolC01g003790.2J;BolC01g010470.2J;BolC02g036160.2J;BolC02g036240.2J;BolC02g048570.2J;BolC03g062440.2J;BolC03g085520.2J;BolC04g019800.2J;BolC04g031180.2J;BolC05g047990.2J;BolC06g002890.2J;BolC06g002900.2J;BolC06g006180.2J;BolC07g022200.2J;BolC07g037360.2J;BolC07g040740.2J;BolC08g007590.2J;BolC08g028740.2J;BolC08g031420.2J;BolC09g027020.2J;BolC09g064460.2J;Brassica_oleracea_newGene…	K03781+K03781+K11816+K00837+K23947+K00626+K11817+K14085+K11820+K03781+K01426+K01426+K01426+K11816+K03781+K00626+K11816+K00128+K03781+K00128+K00626+K01426+K22450	Up
Glycosphingolipid biosynthesis - globo and isoglobo series	ko00603	2	23	2202	19416	BolC02g052390.2J;BolC03g076660.2J	K07407+K01988	Up
Cutin, suberine and wax biosynthesis	ko00073	8	164	2202	19416	BolC02g013900.2J;BolC02g031810.2J;BolC02g031820.2J;BolC03g024440.2J;BolC03g036250.2J;BolC04g006980.2J;BolC04g059260.2J;BolC07g060110.2J	K15401+K15405+K15405+K15400+K21995+K20495+K17991+K15405	Up
Pentose phosphate pathway	ko00030	18	156	2202	19416	BolC02g008200.2J;BolC03g006440.2J;BolC03g039470.2J;BolC04g015370.2J;BolC04g016100.2J;BolC04g016130.2J;BolC04g047110.2J;BolC04g061760.2J;BolC06g008280.2J;BolC06g048050.2J;BolC07g030710.2J;BolC07g043670.2J;BolC09g015070.2J;BolC09g016010.2J;BolC09g023030.2J;BolC09g043160.2J;BolCnng006370.2J;Brassica_oleracea_newGene_7236	K01835+K00616+K00850+K00850+K03841+K03841+K00033+K01623+K00850+K00895+K00850+K00850+K01783+K00033+K01810+K00895+K00850+K01057	Up
Alanine, aspartate and glutamate metabolism	ko00250	19	147	2202	19416	BolC01g040500.2J;BolC02g003000.2J;BolC03g005380.2J;BolC03g023030.2J;BolC03g058810.2J;BolC03g066840.2J;BolC03g066850.2J;BolC03g072890.2J;BolC06g040180.2J;BolC06g045790.2J;BolC06g050360.2J;BolC07g012960.2J;BolC07g056280.2J;BolC08g026300.2J;BolC08g026350.2J;BolC08g051500.2J;BolC09g014750.2J;Brassica_oleracea_newGene_4102;Brassica_oleracea_newGene_4103	K16871+K00261+K14454+K00827+K00294+K01953+K01953+K00827+K01953+K00764+K17761+K00820+K00811+K00814+K00814+K00814+K14454+K00262+K00262	Up
Synthesis and degradation of ketone bodies	ko00072	4	11	2202	19416	BolC02g048570.2J;BolC05g010900.2J;BolC07g037360.2J;BolC09g027020.2J	K00626+K01640+K00626+K00626	Up
Phenylpropanoid biosynthesis	ko00940	40	734	2202	19416	BolC01g004760.2J;BolC01g005260.2J;BolC01g012750.2J;BolC01g026220.2J;BolC01g040730.2J;BolC01g049140.2J;BolC01g056260.2J;BolC02g023950.2J;BolC02g034740.2J;BolC02g051650.2J;BolC02g056730.2J;BolC02g063080.2J;BolC03g052390.2J;BolC03g077050.2J;BolC03g079880.2J;BolC03g079890.2J;BolC03g079900.2J;BolC04g032580.2J;BolC04g049550.2J;BolC05g023580.2J;BolC05g028780.2J;BolC05g029600.2J;BolC05g045670.2J;BolC06g0…	K23260+K00430+K01904+K13065+K10775+K06892+K01188+K00588+K00430+K00430+K13065+K00430+K23260+K22395+K23260+K23260+K23260+K01188+K00430+K22395+K22395+K13065+K06892+K18368+K00430+K23260+K22395+K22395+K13066+K05350+K01188+K01188+K18368+K00430+K22395+K01904+K09753+K09755+K00430+K00430	Up
Fructose and mannose metabolism	ko00051	24	179	2202	19416	BolC01g020190.2J;BolC02g015040.2J;BolC02g055270.2J;BolC03g039470.2J;BolC04g015370.2J;BolC04g016100.2J;BolC04g016130.2J;BolC04g018340.2J;BolC04g061760.2J;BolC05g048270.2J;BolC06g008280.2J;BolC06g025090.2J;BolC06g040520.2J;BolC06g048050.2J;BolC07g030710.2J;BolC07g043670.2J;BolC08g021560.2J;BolC08g049670.2J;BolC08g060270.2J;BolC09g037370.2J;BolC09g038510.2J;BolC09g043160.2J;BolC09g046200.2J;BolCnng0…	K01805+K01805+K00847+K00850+K00850+K03841+K03841+K00847+K01623+K00863+K00850+K00847+K00847+K00895+K00850+K00850+K01805+K19355+K19355+K01805+K00008+K00895+K01805+K00850	Up
N-Glycan biosynthesis	ko00510	12	135	2202	19416	BolC02g006350.2J;BolC02g009960.2J;BolC03g007140.2J;BolC03g083760.2J;BolC05g014490.2J;BolC06g011550.2J;BolC08g011100.2J;BolC09g008930.2J;BolC09g011430.2J;BolC09g052670.2J;BolC09g058680.2J;BolC09g064390.2J	K00737+K07151+K00737+K01230+K03846+K07151+K01230+K05546+K00737+K07151+K00737+K00729	Up
Spliceosome	ko03040	171	672	2202	19416	BolC01g003270.2J;BolC01g013510.2J;BolC01g014330.2J;BolC01g014820.2J;BolC01g015810.2J;BolC01g019940.2J;BolC01g024540.2J;BolC01g025650.2J;BolC01g027750.2J;BolC01g027810.2J;BolC01g031880.2J;BolC01g035630.2J;BolC01g036220.2J;BolC01g043090.2J;BolC01g044070.2J;BolC01g049710.2J;BolC01g049740.2J;BolC01g051440.2J;BolC02g004630.2J;BolC02g005390.2J;BolC02g005880.2J;BolC02g010210.2J;BolC02g014170.2J;BolC02g0…	K12897+K12856+K12873+K12829+K12847+K12893+K12813+K12862+K12869+K12869+K03283+K12844+K12837+K13025+K12870+K12741+K12863+K12830+K12812+K12815+K12818+K12885+K13098+K12854+K12869+K12854+K12836+K11094+K12867+K12900+K12896+K12827+K03283+K12818+K12900+K12893+K12857+K12837+K12896+K12849+K12842+K12835+K12872+K12831+K12823+K12830+K12863+K12865+K12828+K12891+K12890+K12862+K03283+K12879+K12818+K12843+K12840+…	Up
Valine, leucine and isoleucine biosynthesis	ko00290	6	61	2202	19416	BolC01g030850.2J;BolC03g084910.2J;BolC04g017440.2J;BolC05g007910.2J;BolC08g021600.2J;BolC08g037720.2J	K01652+K00053+K01653+K00826+K00826+K01754	Up
DNA replication	ko03030	30	598	2202	19416	BolC01g040220.2J;BolC01g044350.2J;BolC01g056650.2J;BolC02g028260.2J;BolC02g031070.2J;BolC02g042360.2J;BolC02g045810.2J;BolC03g001550.2J;BolC03g011210.2J;BolC03g022600.2J;BolC03g055170.2J;BolC03g062580.2J;BolC04g015210.2J;BolC04g020450.2J;BolC04g028740.2J;BolC04g050340.2J;BolC04g051250.2J;BolC04g058410.2J;BolC05g022210.2J;BolC05g032290.2J;BolC05g036190.2J;BolC05g043390.2J;BolC06g001000.2J;BolC06g0…	K02209+K03111+K10739+K07466+K07466+K02328+K07466+K07466+K10754+K02209+K07466+K07466+K07466+K04802+K07466+K02209+K07466+K07466+K03505+K02335+K07466+K02335+K02540+K10754+K07466+K02209+K10747+K07466+K07466+K07466	Up
Vitamin B6 metabolism	ko00750	3	27	2202	19416	BolC01g009650.2J;BolC01g046750.2J;BolC04g068050.2J	K13248+K06215+K00275	Up
Base excision repair	ko03410	20	116	2202	19416	BolC01g003000.2J;BolC01g004810.2J;BolC01g044320.2J;BolC02g037730.2J;BolC02g042360.2J;BolC03g025130.2J;BolC03g064820.2J;BolC04g020450.2J;BolC05g017130.2J;BolC05g022210.2J;BolC05g032290.2J;BolC05g043390.2J;BolC07g001380.2J;BolC07g044930.2J;BolC08g022060.2J;BolC08g035180.2J;BolC08g053690.2J;BolC08g057260.2J;Brassica_oleracea_newGene_4428;Brassica_oleracea_newGene_9510	K10772+K10773+K03648+K10798+K02328+K01142+K10802+K04802+K01247+K03505+K02335+K02335+K10801+K10802+K03512+K01247+K03648+K10747+K03575+K03575	Up
Folate biosynthesis	ko00790	9	62	2202	19416	BolC01g002000.2J;BolC03g011030.2J;BolC03g019150.2J;BolC03g059700.2J;BolC04g050760.2J;BolC08g048540.2J;BolC09g010440.2J;BolC09g022730.2J;Brassica_oleracea_newGene_1633	K15631+K15376+K03639+K00079+K15631+K14652+K15631+K01113+K03639	Up
Tyrosine metabolism	ko00350	16	116	2202	19416	BolC02g018460.2J;BolC02g018560.2J;BolC03g005380.2J;BolC03g085200.2J;BolC04g003250.2J;BolC04g065780.2J;BolC05g004680.2J;BolC05g018550.2J;BolC06g007950.2J;BolC07g022190.2J;BolC07g056280.2J;BolC09g003110.2J;BolC09g014750.2J;BolC09g041130.2J;Brassica_oleracea_newGene_1864;Brassica_oleracea_newGene_4598	K00451+K00815+K14454+K00276+K00121+K00276+K00457+K00276+K01557+K00276+K00811+K00276+K14454+K00451+K01800+K18857	Up
Biotin metabolism	ko00780	5	53	2202	19416	BolC01g055840.2J;BolC01g055880.2J;BolC05g061440.2J;BolC09g025780.2J;BolC09g046140.2J	K00059+K00059+K00059+K09458+K19562	Up
Pantothenate and CoA biosynthesis	ko00770	15	111	2202	19416	BolC01g030850.2J;BolC01g045010.2J;BolC01g052420.2J;BolC02g022000.2J;BolC02g055820.2J;BolC03g084910.2J;BolC04g002180.2J;BolC04g004520.2J;BolC04g017440.2J;BolC04g066070.2J;BolC05g007910.2J;BolC06g024720.2J;BolC08g007590.2J;BolC08g021600.2J;BolC08g031420.2J	K01652+K00207+K01513+K17839+K01918+K00053+K01513+K17839+K01653+K17839+K00826+K17839+K00128+K00826+K00128	Up
Benzoxazinoid biosynthesis	ko00402	4	31	2202	19416	BolC03g012520.2J;BolC03g012530.2J;BolC04g057090.2J;BolC05g004160.2J	K13229+K13229+K13229+K13229	Up
Diterpenoid biosynthesis	ko00904	15	172	2202	19416	BolC03g020000.2J;BolC04g015400.2J;BolC04g016650.2J;BolC07g015570.2J;BolC07g040610.2J;BolC09g047380.2J;BolC09g064340.2J;Brassica_oleracea_newGene_3500;Brassica_oleracea_newGene_4689;Brassica_oleracea_newGene_6164;Brassica_oleracea_newGene_6206;Brassica_oleracea_newGene_692;Brassica_oleracea_newGene_7350;Brassica_oleracea_newGene_7940;Brassica_oleracea_newGene_7942	K04125+K04125+K04123+K04125+K04122+K04125+K05282+K04125+K04125+K04125+K04122+K04125+K04122+K04125+K04125	Up
Glycosphingolipid biosynthesis - lacto and neolacto series	ko00601	1	9	2202	19416	BolC03g076660.2J	K01988	Up
Starch and sucrose metabolism	ko00500	58	629	2202	19416	BolC01g007930.2J;BolC01g026340.2J;BolC01g031610.2J;BolC01g035560.2J;BolC01g048980.2J;BolC01g052420.2J;BolC01g056260.2J;BolC02g008200.2J;BolC02g014480.2J;BolC02g016810.2J;BolC02g027090.2J;BolC02g027100.2J;BolC02g029780.2J;BolC02g045740.2J;BolC02g049560.2J;BolC02g055270.2J;BolC03g014970.2J;BolC03g049010.2J;BolC03g066560.2J;BolC04g002180.2J;BolC04g007240.2J;BolC04g012540.2J;BolC04g018340.2J;BolC04g0…	K19893+K01176+K01176+K16055+K01193+K01513+K01188+K01835+K19893+K01177+K16055+K19891+K00695+K01177+K19891+K00847+K01177+K01177+K00688+K01513+K01177+K00700+K00847+K16055+K01188+K00700+K00696+K01193+K01087+K19891+K19891+K19891+K00847+K00695+K16055+K00847+K01176+K01179+K00696+K01179+K01194+K01176+K16055+K00695+K00695+K05350+K01188+K01188+K00695+K19891+K00705+K16055+K01810+K19891+K01176+K00695+K00695+…	Up
Nicotinate and nicotinamide metabolism	ko00760	2	52	2202	19416	BolC01g052420.2J;BolC04g002180.2J	K01513+K01513	Up
Ribosome	ko03010	32	783	2202	19416	BolC01g026520.2J;BolC01g034990.2J;BolC01g045420.2J;BolC01g049810.2J;BolC01g053650.2J;BolC02g008970.2J;BolC02g009150.2J;BolC02g029930.2J;BolC02g052940.2J;BolC02g062650.2J;BolC03g036930.2J;BolC03g080920.2J;BolC04g027250.2J;BolC04g042040.2J;BolC04g054330.2J;BolC04g055630.2J;BolC04g067350.2J;BolC05g013470.2J;BolC05g029820.2J;BolC05g038990.2J;BolC05g040380.2J;BolC05g058070.2J;BolC07g034710.2J;BolC08g0…	K02995+K02981+K02995+K02946+K02942+K02913+K02913+K02985+K02996+K02904+K02894+K02932+K02925+K02936+K02990+K02903+K02953+K02956+K02948+K02948+K02995+K02942+K02996+K02882+K02985+K02923+K02881+K02996+K02876+K02891+K02907+K02985	Up
Phosphatidylinositol signaling system	ko04070	28	257	2202	19416	BolC01g004980.2J;BolC01g012790.2J;BolC01g027320.2J;BolC01g047610.2J;BolC01g053340.2J;BolC01g057580.2J;BolC01g057640.2J;BolC02g001980.2J;BolC02g014070.2J;BolC02g034040.2J;BolC02g061960.2J;BolC03g001910.2J;BolC03g027280.2J;BolC03g035810.2J;BolC03g056750.2J;BolC03g068010.2J;BolC05g000780.2J;BolC05g023640.2J;BolC05g033840.2J;BolC05g057550.2J;BolC06g003840.2J;BolC06g036980.2J;BolC06g037540.2J;BolC06g0…	K00913+K00901+K21797+K00921+K05857+K05857+K13024+K18081+K05857+K00889+K19801+K18081+K00981+K05857+K19801+K13711+K13711+K13711+K00888+K05857+K00888+K01099+K02183+K20279+K01110+K05857+K00981+K21797	Up
Fatty acid degradation	ko00071	27	107	2202	19416	BolC01g010220.2J;BolC01g054030.2J;BolC02g013900.2J;BolC02g037610.2J;BolC02g048570.2J;BolC03g019710.2J;BolC03g038630.2J;BolC03g085520.2J;BolC04g003250.2J;BolC04g006980.2J;BolC04g016040.2J;BolC04g023780.2J;BolC04g040480.2J;BolC05g058870.2J;BolC05g058900.2J;BolC07g037360.2J;BolC07g039570.2J;BolC07g054250.2J;BolC08g007590.2J;BolC08g013810.2J;BolC08g019440.2J;BolC08g031420.2J;BolC08g036070.2J;BolC09g0…	K10527+K10527+K15401+K07517+K00626+K07513+K10527+K14085+K00121+K20495+K07513+K01897+K00232+K10527+K00249+K00626+K01897+K10527+K00128+K07517+K10527+K00128+K00232+K00232+K00626+K18857+K10527	Up
Lysine biosynthesis	ko00300	6	54	2202	19416	BolC03g019750.2J;BolC04g006920.2J;BolC04g010970.2J;BolC05g012390.2J;BolC08g052950.2J;BolC09g036830.2J	K10206+K01714+K01778+K00133+K00133+K00133	Up
Various types of N-glycan biosynthesis	ko00513	8	95	2202	19416	BolC02g009960.2J;BolC03g015090.2J;BolC03g083760.2J;BolC05g014490.2J;BolC06g004150.2J;BolC06g011550.2J;BolC08g011100.2J;BolC09g052670.2J	K07151+K03714+K01230+K03846+K00753+K07151+K01230+K07151	Up
Linoleic acid metabolism	ko00591	2	96	2202	19416	BolC08g033850.2J;BolC09g067930.2J	K15718+K14674	Up
Nitrogen metabolism	ko00910	9	133	2202	19416	BolC01g001510.2J;BolC01g005130.2J;BolC01g034460.2J;BolC02g003000.2J;BolC03g056470.2J;BolC04g065040.2J;BolC07g036120.2J;Brassica_oleracea_newGene_4102;Brassica_oleracea_newGene_4103	K01455+K01673+K01673+K00261+K01673+K00284+K01455+K00262+K00262	Up
Brassinosteroid biosynthesis	ko00905	5	28	2202	19416	BolC01g028080.2J;BolC01g049010.2J;BolC02g002410.2J;BolC04g023560.2J;BolC09g066290.2J	K09587+K12638+K09588+K15639+K09588	Up
Autophagy - other	ko04136	20	101	2202	19416	BolC01g008300.2J;BolC01g009800.2J;BolC01g044190.2J;BolC02g039120.2J;BolC02g046180.2J;BolC03g027300.2J;BolC04g004070.2J;BolC04g005380.2J;BolC04g054600.2J;BolC05g045410.2J;BolC05g046000.2J;BolC05g057400.2J;BolC06g004530.2J;BolC06g026560.2J;BolC07g055350.2J;BolC07g055590.2J;BolC08g045070.2J;BolC09g020560.2J;BolC09g036260.2J;BolC09g051360.2J	K08330+K08333+K08331+K08341+K08337+K08341+K08269+K08342+K08343+K17906+K08331+K07204+K07203+K08334+K17908+K08330+K08269+K04382+K17890+K08266	Up
Non-homologous end-joining	ko03450	2	17	2202	19416	BolC08g022060.2J;BolC09g041540.2J	K03512+K10865	Up
Sesquiterpenoid and triterpenoid biosynthesis	ko00909	3	85	2202	19416	BolC03g053620.2J;BolC07g034850.2J;BolC07g041990.2J	K15815+K15803+K00511	Up
RNA transport	ko03013	112	786	2202	19416	BolC01g015230.2J;BolC01g019180.2J;BolC01g043090.2J;BolC01g051390.2J;BolC01g053830.2J;BolC02g000750.2J;BolC02g004630.2J;BolC02g008590.2J;BolC02g012850.2J;BolC02g014170.2J;BolC02g017170.2J;BolC02g020080.2J;BolC02g021170.2J;BolC02g029300.2J;BolC02g033140.2J;BolC02g035890.2J;BolC02g039160.2J;BolC02g047330.2J;BolC02g060940.2J;BolC03g009270.2J;BolC03g014640.2J;BolC03g015720.2J;BolC03g023740.2J;BolC03g0…	K18213+K03262+K13025+K03248+K03754+K14292+K12812+K03259+K13126+K13098+K12160+K13126+K03231+K03239+K03243+K14298+K14300+K14326+K05019+K03259+K01164+K14318+K14327+K03237+K03257+K03248+K03257+K03262+K12879+K14307+K02516+K13025+K12876+K03113+K14317+K13130+K14306+K03240+K13126+K13171+K13174+K03260+K03252+K18655+K12881+K03680+K14303+K03240+K03248+K13130+K14325+K00974+K14328+K14303+K14293+K14313+K00784+…	Up
Thiamine metabolism	ko00730	9	46	2202	19416	BolC01g010570.2J;BolC03g054400.2J;BolC04g008750.2J;BolC05g001470.2J;BolC05g021270.2J;BolC06g038560.2J;BolC06g038570.2J;BolC09g040950.2J;BolC09g061350.2J	K22911+K04487+K00939+K00949+K14153+K06949+K06949+K20896+K01662	Up
2-Oxocarboxylic acid metabolism	ko01210	23	293	2202	19416	BolC01g030850.2J;BolC03g005380.2J;BolC03g062980.2J;BolC03g075250.2J;BolC03g078870.2J;BolC03g084910.2J;BolC04g017440.2J;BolC04g019800.2J;BolC05g007910.2J;BolC05g012390.2J;BolC06g016330.2J;BolC07g056280.2J;BolC08g021600.2J;BolC08g026300.2J;BolC08g026350.2J;BolC08g042480.2J;BolC08g051500.2J;BolC08g052950.2J;BolC09g001960.2J;BolC09g014750.2J;BolC09g036830.2J;Brassica_oleracea_newGene_9679;Brassica_ol…	K01652+K14454+K00031+K01681+K00030+K00053+K01653+K11820+K00826+K00133+K12153+K00811+K00826+K00814+K00814+K01647+K00814+K00133+K00031+K14454+K00133+K12153+K12153	Up
Riboflavin metabolism	ko00740	5	53	2202	19416	BolC01g052420.2J;BolC02g001140.2J;BolC03g025500.2J;BolC04g002180.2J;BolC08g048540.2J	K01513+K00953+K18453+K01513+K14652	Up
Ether lipid metabolism	ko00565	17	78	2202	19416	BolC02g037360.2J;BolC02g058510.2J;BolC02g062620.2J;BolC03g043980.2J;BolC03g055370.2J;BolC05g005180.2J;BolC05g045960.2J;BolC07g041190.2J;BolC07g044520.2J;BolC07g058440.2J;BolC08g035450.2J;BolC08g053890.2J;BolC08g053940.2J;BolC09g012130.2J;BolC09g012860.2J;BolC09g034640.2J;BolC09g067930.2J	K01115+K01115+K06123+K01115+K06123+K01114+K00993+K16860+K01062+K01115+K01062+K00993+K00993+K01062+K01062+K01114+K14674	Up
Glyoxylate and dicarboxylate metabolism	ko00630	31	354	2202	19416	BolC01g001510.2J;BolC01g003780.2J;BolC01g003790.2J;BolC01g032630.2J;BolC02g001600.2J;BolC02g016760.2J;BolC02g048570.2J;BolC03g026580.2J;BolC03g075250.2J;BolC04g031180.2J;BolC04g033010.2J;BolC04g053450.2J;BolC04g065040.2J;BolC04g067560.2J;BolC05g018430.2J;BolC05g020360.2J;BolC06g027540.2J;BolC07g005250.2J;BolC07g022200.2J;BolC07g036120.2J;BolC07g037360.2J;BolC07g042870.2J;BolC07g047730.2J;BolC08g0…	K01455+K03781+K03781+K01895+K01638+K22133+K00626+K22133+K01681+K03781+K22133+K00600+K00284+K15919+K01913+K00600+K15919+K01913+K03781+K01455+K00626+K01895+K11517+K03781+K22133+K01647+K15919+K00626+K22133+K00122+K00026	Up
RNA degradation	ko03018	76	645	2202	19416	BolC01g012360.2J;BolC01g026550.2J;BolC01g030280.2J;BolC01g049630.2J;BolC02g003750.2J;BolC02g007330.2J;BolC02g008990.2J;BolC02g012850.2J;BolC02g020080.2J;BolC02g027600.2J;BolC02g032070.2J;BolC02g053550.2J;BolC03g004290.2J;BolC03g006680.2J;BolC03g011380.2J;BolC03g012630.2J;BolC03g021190.2J;BolC03g029770.2J;BolC03g039470.2J;BolC03g048940.2J;BolC03g058170.2J;BolC03g066540.2J;BolC04g000650.2J;BolC04g0…	K12598+K12617+K12604+K12616+K04043+K01148+K04077+K13126+K13126+K12598+K12619+K01148+K04043+K01689+K12581+K12593+K14442+K03514+K00850+K04077+K10643+K12599+K14442+K00850+K14442+K13126+K04077+K12617+K12607+K12607+K14442+K12617+K12616+K12598+K12580+K00850+K01148+K12604+K12603+K12603+K03678+K12598+K12598+K12617+K12598+K12598+K12603+K12619+K12600+K12617+K01148+K01148+K00850+K14442+K01148+K12592+K00850+…	Up
Protein processing in endoplasmic reticulum	ko04141	97	701	2202	19416	BolC01g003610.2J;BolC01g004800.2J;BolC01g013800.2J;BolC01g019620.2J;BolC01g022530.2J;BolC01g025330.2J;BolC01g030930.2J;BolC01g031880.2J;BolC01g033770.2J;BolC01g034400.2J;BolC01g045860.2J;BolC01g048570.2J;BolC01g053590.2J;BolC02g009960.2J;BolC02g010680.2J;BolC02g022760.2J;BolC02g032340.2J;BolC02g034560.2J;BolC02g052630.2J;BolC03g002850.2J;BolC03g004520.2J;BolC03g010300.2J;BolC03g017310.2J;BolC03g0…	K04523+K10661+K07765+K13993+K10666+K10578+K09580+K03283+K09523+K04374+K10578+K09523+K09487+K07151+K03868+K16196+K03094+K06689+K10666+K03283+K10956+K08653+K13993+K03237+K10666+K03347+K07953+K09562+K06689+K14018+K04523+K08852+K14007+K03283+K01230+K10666+K14006+K03283+K14007+K07953+K03283+K10661+K13993+K14026+K10666+K03094+K10084+K10956+K04079+K13989+K09487+K09561+K09580+K13993+K07151+K07953+K16196+…	Up
Indole alkaloid biosynthesis	ko00901	1	30	2202	19416	BolC08g042890.2J	K01757	Up
Other types of O-glycan biosynthesis	ko00514	3	33	2202	19416	BolC03g040990.2J;BolC07g032770.2J;BolC08g041250.2J	K09667+K18134+K18134	Up
Monoterpenoid biosynthesis	ko00902	2	13	2202	19416	BolC03g029860.2J;BolC04g034930.2J	K12467+K23232	Up
Endocytosis	ko04144	61	615	2202	19416	BolC01g003310.2J;BolC01g013870.2J;BolC01g031880.2J;BolC02g005960.2J;BolC02g027200.2J;BolC02g032290.2J;BolC02g032590.2J;BolC02g034040.2J;BolC02g037360.2J;BolC02g039500.2J;BolC02g039550.2J;BolC02g058510.2J;BolC02g061710.2J;BolC03g002850.2J;BolC03g003260.2J;BolC03g006370.2J;BolC03g041810.2J;BolC03g043980.2J;BolC03g051700.2J;BolC03g053410.2J;BolC03g065950.2J;BolC03g066000.2J;BolC03g074280.2J;BolC03g0…	K19476+K12191+K03283+K12183+K07904+K18468+K12183+K00889+K01115+K10591+K10591+K01115+K12182+K03283+K17917+K12489+K12183+K01115+K12189+K19366+K03283+K12471+K12189+K12184+K04646+K03283+K04645+K03283+K12183+K11866+K12472+K11866+K18443+K12479+K11866+K12197+K18468+K12189+K17917+K12472+K07904+K11866+K12486+K01115+K19476+K03283+K12189+K12200+K03283+K12198+K12194+K10591+K17917+K07904+K12489+K17917+K17917+…	Up
Stilbenoid, diarylheptanoid and gingerol biosynthesis	ko00945	4	72	2202	19416	BolC01g026220.2J;BolC02g023950.2J;BolC02g056730.2J;BolC05g029600.2J	K13065+K00588+K13065+K13065	Up
MAPK signaling pathway - plant	ko04016	105	1141	2202	19416	BolC01g003780.2J;BolC01g003790.2J;BolC01g004870.2J;BolC01g018520.2J;BolC01g020650.2J;BolC01g025080.2J;BolC01g038640.2J;BolC01g049390.2J;BolC01g051280.2J;BolC01g051310.2J;BolC01g051360.2J;BolC01g052780.2J;BolC01g054550.2J;BolC02g025920.2J;BolC02g046650.2J;BolC02g056610.2J;BolC03g013730.2J;BolC03g015660.2J;BolC03g016360.2J;BolC03g017120.2J;BolC03g018020.2J;BolC03g019480.2J;BolC03g026650.2J;BolC03g0…	K03781+K03781+K14498+K13425+K14497+K13422+K20551+K20606+K14497+K14497+K14497+K13420+K16224+K13416+K13420+K13425+K14510+K16224+K14496+K13416+K13423+K13416+K14512+K13414+K14496+K20606+K14514+K20558+K14512+K13425+K13423+K17686+K17686+K03781+K20557+K13423+K13425+K20716+K13420+K13420+K13422+K14497+K13414+K14509+K20716+K14497+K20535+K14496+K20557+K14514+K14497+K20718+K13416+K13416+K14496+K20727+K14509+…	Up
Arginine and proline metabolism	ko00330	33	204	2202	19416	BolC02g022000.2J;BolC02g027290.2J;BolC02g054880.2J;BolC03g005380.2J;BolC03g058810.2J;BolC03g067000.2J;BolC03g085520.2J;BolC04g004520.2J;BolC04g006940.2J;BolC04g047940.2J;BolC04g053460.2J;BolC04g054280.2J;BolC04g066070.2J;BolC05g047990.2J;BolC05g059360.2J;BolC06g002890.2J;BolC06g002900.2J;BolC06g024720.2J;BolC07g023190.2J;BolC07g028770.2J;BolC07g036010.2J;BolC07g052320.2J;BolC07g056280.2J;BolC08g0…	K17839+K14329+K14329+K14454+K00294+K13427+K14085+K17839+K01583+K14329+K14329+K12251+K17839+K01426+K00472+K01426+K01426+K17839+K00472+K00819+K00472+K00472+K00811+K00472+K00128+K00128+K00797+K00472+K14454+K13427+K00472+K01426+K01611	Up
Zeatin biosynthesis	ko00908	8	92	2202	19416	BolC01g031740.2J;BolC03g021670.2J;BolC04g011840.2J;BolC06g046720.2J;BolC07g020870.2J;BolC07g020880.2J;BolC09g066130.2J;BolC09g066140.2J	K13493+K13496+K13496+K00279+K23452+K23452+K13493+K13493	Up
Fatty acid metabolism	ko01212	24	155	2202	19416	BolC01g010220.2J;BolC01g031750.2J;BolC01g054030.2J;BolC01g055840.2J;BolC01g055880.2J;BolC02g048570.2J;BolC03g019710.2J;BolC03g038630.2J;BolC04g016040.2J;BolC04g023780.2J;BolC04g040480.2J;BolC05g058870.2J;BolC05g058900.2J;BolC05g061440.2J;BolC06g025470.2J;BolC07g037360.2J;BolC07g039570.2J;BolC07g054250.2J;BolC08g019440.2J;BolC08g036070.2J;BolC09g009570.2J;BolC09g025780.2J;BolC09g027020.2J;Brassica…	K10527+K03921+K10527+K00059+K00059+K00626+K07513+K10527+K07513+K01897+K00232+K10527+K00249+K00059+K01074+K00626+K01897+K10527+K10527+K00232+K00232+K09458+K00626+K10527	Up
beta-Alanine metabolism	ko00410	19	167	2202	19416	BolC01g045010.2J;BolC02g022000.2J;BolC02g055820.2J;BolC02g063610.2J;BolC03g077640.2J;BolC03g085200.2J;BolC03g085520.2J;BolC04g004520.2J;BolC04g040480.2J;BolC04g065780.2J;BolC04g066070.2J;BolC05g018550.2J;BolC06g024720.2J;BolC07g022190.2J;BolC08g007590.2J;BolC08g031420.2J;BolC08g036070.2J;BolC09g003110.2J;BolC09g009570.2J	K00207+K17839+K01918+K05605+K23146+K00276+K14085+K17839+K00232+K00276+K17839+K00276+K17839+K00276+K00128+K00128+K00232+K00276+K00232	Up
Lysine degradation	ko00310	19	103	2202	19416	BolC01g003040.2J;BolC01g005460.2J;BolC01g026330.2J;BolC02g048570.2J;BolC03g006730.2J;BolC03g085520.2J;BolC04g059170.2J;BolC06g016280.2J;BolC06g026660.2J;BolC06g032540.2J;BolC06g044530.2J;BolC07g037360.2J;BolC07g053560.2J;BolC08g007590.2J;BolC08g031420.2J;BolC08g038030.2J;BolC09g022770.2J;BolC09g027020.2J;BolC09g040350.2J	K18826+K14157+K22748+K00626+K11420+K14085+K11420+K22748+K11422+K11420+K11420+K00626+K11422+K00128+K00128+K11420+K11422+K00626+K11422	Up
Biosynthesis of unsaturated fatty acids	ko01040	7	46	2202	19416	BolC01g031750.2J;BolC03g019710.2J;BolC04g016040.2J;BolC04g040480.2J;BolC05g000310.2J;BolC08g036070.2J;BolC09g009570.2J	K03921+K07513+K07513+K00232+K01068+K00232+K00232	Up
Amino sugar and nucleotide sugar metabolism	ko00520	47	867	2202	19416	BolC01g018170.2J;BolC01g019010.2J;BolC01g025490.2J;BolC02g008200.2J;BolC02g026190.2J;BolC02g040070.2J;BolC02g052640.2J;BolC02g055270.2J;BolC02g056220.2J;BolC03g009240.2J;BolC03g012740.2J;BolC03g056210.2J;BolC03g068910.2J;BolC04g018340.2J;BolC04g058570.2J;BolC05g001290.2J;BolC05g004810.2J;BolC05g005740.2J;BolC05g010150.2J;BolC05g016190.2J;BolC05g018150.2J;BolC05g024580.2J;BolC06g014810.2J;BolC06g0…	K01784+K08678+K12446+K01835+K00326+K08679+K16190+K00847+K15920+K00770+K08678+K15920+K01784+K00847+K01183+K15920+K13648+K01183+K01784+K13648+K01183+K01784+K12450+K12447+K00847+K12447+K00847+K00820+K12448+K16190+K01183+K15920+K01784+K12447+K12448+K01784+K13648+K13648+K16190+K01810+K00965+K00770+K16190+K12447+K12447+K12447+K12447	Up
Propanoate metabolism	ko00640	14	126	2202	19416	BolC01g032630.2J;BolC02g048570.2J;BolC02g063610.2J;BolC03g038620.2J;BolC03g077640.2J;BolC03g086240.2J;BolC04g040480.2J;BolC05g019730.2J;BolC07g037360.2J;BolC07g042700.2J;BolC07g042870.2J;BolC08g036070.2J;BolC09g009570.2J;BolC09g027020.2J	K01895+K00626+K05605+K09699+K23146+K00167+K00232+K00166+K00626+K01899+K01895+K00232+K00232+K00626	Up
One carbon pool by folate	ko00670	5	57	2202	19416	BolC04g013910.2J;BolC04g053450.2J;BolC04g063230.2J;BolC05g020360.2J;BolC09g000460.2J	K00602+K00600+K00288+K00600+K00288	Up
Inositol phosphate metabolism	ko00562	34	240	2202	19416	BolC01g004980.2J;BolC01g027320.2J;BolC01g047610.2J;BolC01g053340.2J;BolC01g057580.2J;BolC02g001980.2J;BolC02g002140.2J;BolC02g014070.2J;BolC02g034040.2J;BolC02g061960.2J;BolC03g001910.2J;BolC03g002180.2J;BolC03g024240.2J;BolC03g035810.2J;BolC03g056750.2J;BolC03g068010.2J;BolC05g000780.2J;BolC05g005180.2J;BolC05g023640.2J;BolC05g033840.2J;BolC05g037070.2J;BolC05g057550.2J;BolC06g003840.2J;BolC06g0…	K00913+K21797+K00921+K05857+K05857+K18081+K24221+K05857+K00889+K19801+K18081+K24221+K01765+K05857+K19801+K13711+K13711+K01114+K13711+K00888+K24221+K05857+K00888+K01099+K20279+K01110+K05857+K22913+K22913+K22913+K00469+K01114+K21797+K00469	Up
Phosphonate and phosphinate metabolism	ko00440	5	34	2202	19416	BolC04g016790.2J;BolC05g045960.2J;BolC08g011590.2J;BolC08g053890.2J;BolC08g053940.2J	K00968+K00993+K00967+K00993+K00993	Up
Betalain biosynthesis	ko00965	2	56	2202	19416	BolC09g013060.2J;BolC09g058030.2J	K15777+K15777	Up
mRNA surveillance pathway	ko03015	85	349	2202	19416	BolC01g006170.2J;BolC01g009350.2J;BolC01g026170.2J;BolC01g034970.2J;BolC01g042250.2J;BolC01g043090.2J;BolC01g050260.2J;BolC02g004630.2J;BolC02g009680.2J;BolC02g011870.2J;BolC02g012850.2J;BolC02g014170.2J;BolC02g016840.2J;BolC02g020080.2J;BolC02g020660.2J;BolC02g021050.2J;BolC02g047330.2J;BolC02g048460.2J;BolC02g052080.2J;BolC02g052090.2J;BolC02g057250.2J;BolC02g063520.2J;BolC03g013500.2J;BolC03g0…	K14376+K14397+K11584+K14411+K00565+K13025+K14396+K12812+K14409+K14396+K13126+K13098+K14398+K13126+K14401+K14396+K14326+K14411+K11584+K11584+K06269+K14962+K14405+K14398+K14411+K14327+K06269+K06269+K14405+K11584+K06100+K14409+K13025+K12876+K14396+K14396+K14396+K13126+K13171+K18655+K12881+K14400+K14376+K06100+K14411+K14400+K03265+K14325+K14400+K03267+K14404+K06100+K14409+K14328+K11584+K13917+K12876+…	Up
Protein export	ko03060	16	197	2202	19416	BolC02g021590.2J;BolC03g004520.2J;BolC03g056260.2J;BolC03g058050.2J;BolC05g004880.2J;BolC05g012950.2J;BolC05g020000.2J;BolC05g024520.2J;BolC05g026930.2J;BolC05g028090.2J;BolC05g028120.2J;BolC06g051260.2J;BolC08g004710.2J;BolC08g016680.2J;BolC08g022220.2J;BolC09g061640.2J	K03217+K10956+K03100+K09648+K03100+K03106+K03070+K03217+K10956+K03217+K03217+K09540+K03106+K03217+K09648+K09647	Up
Glutathione metabolism	ko00480	30	247	2202	19416	BolC01g046420.2J;BolC01g052930.2J;BolC01g056430.2J;BolC02g031110.2J;BolC02g052920.2J;BolC03g000460.2J;BolC03g046440.2J;BolC03g048910.2J;BolC03g062980.2J;BolC04g030200.2J;BolC04g037610.2J;BolC04g047110.2J;BolC04g048240.2J;BolC04g051450.2J;BolC04g056030.2J;BolC06g017500.2J;BolC07g013200.2J;BolC07g013950.2J;BolC07g028450.2J;BolC07g042590.2J;BolC08g006370.2J;BolC08g031430.2J;BolC08g041750.2J;BolC08g0…	K01255+K00799+K00799+K00799+K10808+K00799+K21888+K00383+K00031+K00432+K00383+K00033+K01255+K01255+K00799+K01469+K00383+K10808+K10807+K00434+K01919+K00797+K10807+K00799+K00031+K00033+K00799+K00432+K00799+K00799	Up
Pyruvate metabolism	ko00620	37	298	2202	19416	BolC01g001280.2J;BolC01g012240.2J;BolC01g025950.2J;BolC01g025970.2J;BolC01g032630.2J;BolC02g001600.2J;BolC02g019750.2J;BolC02g048570.2J;BolC02g062950.2J;BolC03g001330.2J;BolC03g014490.2J;BolC03g017650.2J;BolC03g026390.2J;BolC03g057680.2J;BolC03g085520.2J;BolC04g004220.2J;BolC04g017470.2J;BolC04g032470.2J;BolC04g039530.2J;BolC05g000770.2J;BolC05g006310.2J;BolC05g018430.2J;BolC05g022410.2J;BolC05g0…	K01610+K01595+K01006+K01006+K01895+K01638+K00873+K00626+K01610+K01512+K00873+K00162+K01069+K01759+K14085+K01595+K00161+K00873+K00873+K00161+K01759+K01913+K00161+K01595+K01595+K01595+K00161+K01913+K00626+K01895+K00128+K00128+K01069+K00626+K00873+K00026+K01610	Up
Glycosaminoglycan degradation	ko00531	14	79	2202	19416	BolC01g048990.2J;BolC02g015850.2J;BolC02g061800.2J;BolC02g063380.2J;BolC03g014110.2J;BolC03g028880.2J;BolC03g085790.2J;BolC04g039680.2J;BolC05g052870.2J;BolC07g032130.2J;BolC08g034830.2J;BolC09g027680.2J;BolC09g027690.2J;Brassica_oleracea_newGene_3476	K12309+K12309+K12309+K12309+K12309+K12309+K12309+K12309+K12309+K12309+K12309+K12309+K12309+K12309	Up
Phenylalanine, tyrosine and tryptophan biosynthesis	ko00400	11	140	2202	19416	BolC01g005160.2J;BolC02g018560.2J;BolC03g005380.2J;BolC03g026760.2J;BolC03g028470.2J;BolC03g028550.2J;BolC03g039100.2J;BolC07g037350.2J;BolC07g056280.2J;BolC09g003990.2J;BolC09g014750.2J	K01626+K00815+K14454+K15227+K13832+K01657+K05359+K01609+K00811+K01850+K14454	Up
ABC transporters	ko02010	17	208	2202	19416	BolC03g025260.2J;BolC03g050850.2J;BolC03g067420.2J;BolC03g067430.2J;BolC03g084920.2J;BolC04g008500.2J;BolC04g014310.2J;BolC04g022470.2J;BolC04g036740.2J;BolC04g061640.2J;BolC05g002360.2J;BolC05g034620.2J;BolC06g020800.2J;BolC06g043400.2J;BolC07g051980.2J;BolC07g059870.2J;BolC09g046720.2J	K05643+K05681+K05643+K05643+K05681+K05658+K05665+K05681+K05658+K08712+K05666+K05666+K08712+K05681+K05658+K05677+K05663	Up
Monobactam biosynthesis	ko00261	8	35	2202	19416	BolC04g006920.2J;BolC05g012390.2J;BolC07g004620.2J;BolC08g052950.2J;BolC09g036830.2J;Brassica_oleracea_newGene_1162;Brassica_oleracea_newGene_4014;Brassica_oleracea_newGene_5534	K01714+K00133+K13811+K00133+K00133+K13811+K13811+K13811	Up
SNARE interactions in vesicular transport	ko04130	18	107	2202	19416	BolC01g006930.2J;BolC02g003240.2J;BolC02g047160.2J;BolC03g020490.2J;BolC05g006430.2J;BolC05g010530.2J;BolC05g013800.2J;BolC05g030580.2J;BolC05g056800.2J;BolC06g024020.2J;BolC07g016780.2J;BolC07g019080.2J;BolC07g029450.2J;BolC07g047140.2J;BolC08g025770.2J;BolC08g056650.2J;BolC09g003980.2J;BolC09g061580.2J	K08515+K08486+K08488+K08486+K08486+K08495+K08503+K08488+K08506+K08504+K08500+K08493+K08488+K08488+K08495+K08486+K08493+K08515	Up
Flavonoid biosynthesis	ko00941	7	147	2202	19416	BolC01g025250.2J;BolC01g026220.2J;BolC02g023950.2J;BolC02g056730.2J;BolC05g029600.2J;BolC05g049710.2J;BolC06g020150.2J	K05278+K13065+K00588+K13065+K13065+K22845+K01859	Up
Fatty acid biosynthesis	ko00061	7	105	2202	19416	BolC01g031750.2J;BolC01g055840.2J;BolC01g055880.2J;BolC04g023780.2J;BolC05g061440.2J;BolC07g039570.2J;BolC09g025780.2J	K03921+K00059+K00059+K01897+K00059+K01897+K09458	Up
Glycosylphosphatidylinositol (GPI)-anchor biosynthesis	ko00563	4	70	2202	19416	BolC04g060390.2J;BolC05g013660.2J;BolC08g048410.2J;Brassica_oleracea_newGene_5090	K03859+K05287+K05310+K03434	Up
Ubiquitin mediated proteolysis	ko04120	102	483	2202	19416	BolC01g005360.2J;BolC01g025330.2J;BolC01g035640.2J;BolC01g045860.2J;BolC01g047470.2J;BolC02g000840.2J;BolC02g005260.2J;BolC02g010680.2J;BolC02g023520.2J;BolC02g032340.2J;BolC02g034560.2J;BolC02g039500.2J;BolC02g039550.2J;BolC02g050590.2J;BolC02g058400.2J;BolC02g061110.2J;BolC03g001120.2J;BolC03g006660.2J;BolC03g010150.2J;BolC03g011670.2J;BolC03g017930.2J;BolC03g025450.2J;BolC03g031360.2J;BolC03g0…	K03363+K10578+K10260+K10578+K10615+K10590+K10614+K03868+K10260+K03094+K06689+K10591+K10591+K10573+K10144+K10573+K10590+K03364+K10686+K10144+K03178+K04506+K03364+K08770+K03347+K04506+K06689+K04506+K08770+K10581+K10598+K10615+K10590+K08770+K10581+K04506+K03363+K03363+K03363+K03363+K03363+K03178+K10588+K04506+K10685+K04506+K04506+K10260+K03178+K10599+K04506+K10599+K03094+K10615+K10570+K08770+K10604+…	Up
Cysteine and methionine metabolism	ko00270	34	354	2202	19416	BolC01g001380.2J;BolC01g056270.2J;BolC02g000860.2J;BolC02g018560.2J;BolC02g018730.2J;BolC02g036160.2J;BolC02g038590.2J;BolC03g005380.2J;BolC03g023030.2J;BolC03g032350.2J;BolC03g037400.2J;BolC03g039570.2J;BolC03g072890.2J;BolC04g014810.2J;BolC04g030070.2J;BolC05g003120.2J;BolC05g007910.2J;BolC05g012390.2J;BolC06g018540.2J;BolC06g026890.2J;BolC06g044070.2J;BolC07g009600.2J;BolC07g013600.2J;BolC07g0…	K01762+K22846+K17398+K00815+K16054+K00837+K05933+K14454+K00827+K00558+K01738+K17398+K00827+K00640+K00547+K05933+K00826+K00133+K17398+K22207+K00789+K08963+K01251+K00811+K01919+K00826+K00797+K00133+K17398+K14454+K00133+K00558+K01611+K00026	Up
Glycine, serine and threonine metabolism	ko00260	24	209	2202	19416	BolC03g023030.2J;BolC03g072890.2J;BolC03g085200.2J;BolC03g085520.2J;BolC04g053450.2J;BolC04g065780.2J;BolC04g067560.2J;BolC05g006480.2J;BolC05g012390.2J;BolC05g018550.2J;BolC05g020360.2J;BolC06g007050.2J;BolC06g027540.2J;BolC06g031260.2J;BolC07g022190.2J;BolC07g054900.2J;BolC08g019940.2J;BolC08g019970.2J;BolC08g020030.2J;BolC08g037720.2J;BolC08g052950.2J;BolC08g054640.2J;BolC09g003110.2J;BolC09g0…	K00827+K00827+K00276+K14085+K00600+K00276+K15919+K01620+K00133+K00276+K00600+K01834+K15919+K00130+K00276+K00499+K01620+K01620+K01620+K01754+K00133+K15919+K00276+K00133	Up
Carbon fixation in photosynthetic organisms	ko00710	23	278	2202	19416	BolC01g001280.2J;BolC01g012240.2J;BolC01g025950.2J;BolC01g025970.2J;BolC02g062950.2J;BolC03g005380.2J;BolC04g004220.2J;BolC04g011620.2J;BolC04g011650.2J;BolC04g011660.2J;BolC04g016100.2J;BolC04g016130.2J;BolC04g061760.2J;BolC05g023740.2J;BolC06g004090.2J;BolC06g022400.2J;BolC08g026300.2J;BolC08g026350.2J;BolC08g051500.2J;BolC09g014750.2J;BolC09g015070.2J;Brassica_oleracea_newGene_6192;Brassica_ol…	K01610+K01595+K01006+K01006+K01610+K14454+K01595+K00927+K00927+K00927+K03841+K03841+K01623+K01595+K01595+K01595+K00814+K00814+K00814+K14454+K01783+K00026+K01610	Up
Oxidative phosphorylation	ko00190	27	573	2202	19416	BolC01g012330.2J;BolC01g026900.2J;BolC02g003430.2J;BolC02g015340.2J;BolC02g033290.2J;BolC02g058490.2J;BolC03g004040.2J;BolC03g079330.2J;BolC04g025150.2J;BolC04g038580.2J;BolC04g067000.2J;BolC05g021170.2J;BolC05g050480.2J;BolC07g003170.2J;BolC07g006900.2J;BolC07g045540.2J;BolC08g018550.2J;BolC08g033910.2J;BolC08g035950.2J;BolC09g014770.2J;BolCnng002400.2J;BolCnng002930.2J;Brassica_oleracea_newGene…	K02155+K02111+K03942+K01535+K01535+K00417+K03942+K03884+K03884+K01507+K02257+K01535+K02265+K01535+K02111+K02155+K03942+K02146+K01535+K02154+K02128+K02128+K02111+K01535+K03953+K02111+K02111	Up
Glycosphingolipid biosynthesis - ganglio series	ko00604	14	70	2202	19416	BolC01g048990.2J;BolC02g015850.2J;BolC02g061800.2J;BolC02g063380.2J;BolC03g014110.2J;BolC03g028880.2J;BolC03g085790.2J;BolC04g039680.2J;BolC05g052870.2J;BolC07g032130.2J;BolC08g034830.2J;BolC09g027680.2J;BolC09g027690.2J;Brassica_oleracea_newGene_3476	K12309+K12309+K12309+K12309+K12309+K12309+K12309+K12309+K12309+K12309+K12309+K12309+K12309+K12309	Up
Pyrimidine metabolism	ko00240	21	169	2202	19416	BolC01g002070.2J;BolC01g010710.2J;BolC01g021200.2J;BolC01g045010.2J;BolC01g052420.2J;BolC01g055720.2J;BolC02g030660.2J;BolC02g052920.2J;BolC03g014100.2J;BolC03g086590.2J;BolC04g002180.2J;BolC05g027820.2J;BolC05g053430.2J;BolC05g056500.2J;BolC06g021500.2J;BolC07g013950.2J;BolC07g014940.2J;BolC07g028450.2J;BolC08g041750.2J;BolC09g048590.2J;BolC09g057710.2J	K13800+K01510+K00876+K00207+K01513+K14641+K00876+K10808+K14641+K00876+K01513+K00943+K14641+K09903+K13421+K10808+K01937+K10807+K10807+K00943+K00943	Up
Nucleotide excision repair	ko03420	38	561	2202	19416	BolC01g010250.2J;BolC01g056650.2J;BolC02g007640.2J;BolC02g010680.2J;BolC02g025910.2J;BolC02g028260.2J;BolC02g031070.2J;BolC02g042360.2J;BolC02g045810.2J;BolC03g001550.2J;BolC03g011210.2J;BolC03g055170.2J;BolC03g062580.2J;BolC04g015210.2J;BolC04g020450.2J;BolC04g028740.2J;BolC04g046740.2J;BolC04g046880.2J;BolC04g051250.2J;BolC04g058410.2J;BolC05g015950.2J;BolC05g022210.2J;BolC05g025380.2J;BolC05g0…	K02202+K10739+K10838+K03868+K03141+K07466+K07466+K02328+K07466+K07466+K10754+K07466+K07466+K07466+K04802+K07466+K10848+K10843+K07466+K07466+K03143+K03505+K10570+K02335+K07466+K02335+K10754+K07466+K10846+K10841+K03142+K03143+K02202+K10747+K07466+K10610+K07466+K07466	Up
Ribosome biogenesis in eukaryotes	ko03008	66	296	2202	19416	BolC01g006830.2J;BolC01g011010.2J;BolC01g020070.2J;BolC01g027630.2J;BolC01g046090.2J;BolC02g003440.2J;BolC02g004660.2J;BolC02g023110.2J;BolC02g023140.2J;BolC02g032070.2J;BolC02g035410.2J;BolC02g037740.2J;BolC02g047460.2J;BolC02g057360.2J;BolC03g007890.2J;BolC03g014640.2J;BolC03g015450.2J;BolC03g017520.2J;BolC03g030720.2J;BolC03g033230.2J;BolC03g035720.2J;BolC03g044090.2J;BolC03g074540.2J;BolC04g0…	K14558+K03115+K14563+K07179+K14558+K14558+K14546+K14572+K14572+K12619+K03097+K14567+K03115+K14558+K14560+K01164+K14570+K14571+K14548+K14554+K14571+K14558+K14544+K14566+K11883+K14539+K07178+K14566+K06943+K14569+K14558+K14548+K14574+K14536+K14558+K11108+K14564+K11883+K14568+K14570+K14525+K07562+K03097+K12619+K14570+K14573+K14573+K14544+K14536+K03115+K06943+K14539+K14568+K14521+K14573+K14536+K14544+…	Up
Limonene and pinene degradation	ko00903	2	19	2202	19416	BolC08g007590.2J;BolC08g031420.2J	K00128+K00128	Up
Arachidonic acid metabolism	ko00590	7	77	2202	19416	BolC02g042220.2J;BolC03g059700.2J;BolC04g030200.2J;BolC05g001460.2J;BolC09g031890.2J;BolC09g039770.2J;BolC09g067930.2J	K05309+K00079+K00432+K15730+K00432+K08726+K14674	Up
Glycolysis / Gluconeogenesis	ko00010	47	342	2202	19416	BolC01g001280.2J;BolC01g025950.2J;BolC01g025970.2J;BolC01g032630.2J;BolC02g008200.2J;BolC02g019750.2J;BolC02g062950.2J;BolC03g006680.2J;BolC03g007160.2J;BolC03g014490.2J;BolC03g017650.2J;BolC03g039470.2J;BolC03g085520.2J;BolC04g003250.2J;BolC04g010560.2J;BolC04g011620.2J;BolC04g011650.2J;BolC04g011660.2J;BolC04g012570.2J;BolC04g015370.2J;BolC04g016100.2J;BolC04g016130.2J;BolC04g017470.2J;BolC04g0…	K01610+K01006+K01006+K01895+K01835+K00873+K01610+K01689+K01792+K00873+K00162+K00850+K14085+K00121+K00002+K00927+K00927+K00927+K00002+K00850+K03841+K03841+K00161+K00873+K00873+K01623+K00161+K01913+K00161+K01785+K01834+K00850+K00161+K00895+K01913+K00850+K01895+K00850+K00128+K00128+K01810+K00895+K01689+K00873+K00850+K18857+K01610	Up
Plant hormone signal transduction	ko04075	173	1153	2202	19416	BolC01g000480.2J;BolC01g001840.2J;BolC01g002210.2J;BolC01g004020.2J;BolC01g004840.2J;BolC01g004870.2J;BolC01g007080.2J;BolC01g010580.2J;BolC01g018270.2J;BolC01g020650.2J;BolC01g020700.2J;BolC01g020720.2J;BolC01g023920.2J;BolC01g025080.2J;BolC01g026980.2J;BolC01g039640.2J;BolC01g043560.2J;BolC01g048710.2J;BolC01g049560.2J;BolC01g050600.2J;BolC01g051280.2J;BolC01g051310.2J;BolC01g051360.2J;BolC01g0…	K13415+K12126+K14503+K14488+K14432+K14498+K14491+K14484+K14494+K14497+K14508+K14508+K14494+K13422+K13464+K14484+K14432+K14488+K13415+K14431+K14497+K14497+K14497+K14484+K13464+K14486+K13416+K14491+K14491+K14431+K14493+K14487+K14510+K14496+K13416+K13416+K14494+K13463+K16189+K14512+K14506+K14485+K14496+K13415+K14491+K13415+K14514+K16189+K14484+K14489+K14486+K14491+K14500+K14484+K12126+K14512+K13463+…	Up
Homologous recombination	ko03440	35	620	2202	19416	BolC01g003030.2J;BolC01g021860.2J;BolC01g044350.2J;BolC01g055510.2J;BolC01g056650.2J;BolC02g028260.2J;BolC02g031070.2J;BolC02g042360.2J;BolC02g045810.2J;BolC02g050770.2J;BolC03g001550.2J;BolC03g039400.2J;BolC03g051920.2J;BolC03g055170.2J;BolC03g061070.2J;BolC03g062580.2J;BolC03g075290.2J;BolC04g011050.2J;BolC04g015210.2J;BolC04g028740.2J;BolC04g051250.2J;BolC04g058410.2J;BolC05g022210.2J;BolC05g0…	K12173+K10875+K03111+K10728+K10739+K07466+K07466+K02328+K07466+K10683+K07466+K03553+K10875+K07466+K04728+K07466+K12173+K10683+K07466+K07466+K07466+K07466+K03505+K02335+K07466+K02335+K03553+K07466+K12173+K10882+K03553+K07466+K07466+K07466+K10865	Up
Phagosome	ko04145	16	257	2202	19416	BolC01g012330.2J;BolC01g014110.2J;BolC01g047610.2J;BolC02g010010.2J;BolC02g047160.2J;BolC02g061710.2J;BolC03g004520.2J;BolC04g020470.2J;BolC05g026930.2J;BolC05g030580.2J;BolC07g029450.2J;BolC07g045540.2J;BolC07g047140.2J;BolC08g021750.2J;BolC08g033910.2J;BolC09g014770.2J	K02155+K07375+K00921+K07374+K08488+K12182+K10956+K07375+K10956+K08488+K08488+K02155+K08488+K01368+K02146+K02154	Up
Isoflavonoid biosynthesis	ko00943	3	29	2202	19416	BolC02g054060.2J;BolC09g062040.2J;BolC09g062110.2J	K13260+K13260+K13260	Up
Valine, leucine and isoleucine degradation	ko00280	31	135	2202	19416	BolC01g040110.2J;BolC02g013880.2J;BolC02g048570.2J;BolC02g063610.2J;BolC03g012890.2J;BolC03g019710.2J;BolC03g023030.2J;BolC03g038620.2J;BolC03g065200.2J;BolC03g072890.2J;BolC03g077640.2J;BolC03g080020.2J;BolC03g085520.2J;BolC03g086240.2J;BolC04g016040.2J;BolC05g007910.2J;BolC05g010900.2J;BolC05g015890.2J;BolC05g019730.2J;BolC05g058900.2J;BolC07g037360.2J;BolC08g007590.2J;BolC08g021600.2J;BolC08g0…	K01968+K01968+K00626+K05605+K01968+K07513+K00827+K09699+K00253+K00827+K23146+K01969+K14085+K00167+K07513+K00826+K01640+K00020+K00166+K00249+K00626+K00128+K00826+K00128+K01968+K01968+K00626+K01968+K01968+K00020+K01968	Up
Steroid biosynthesis	ko00100	10	88	2202	19416	BolC02g040080.2J;BolC03g006590.2J;BolC04g004870.2J;BolC04g014640.2J;BolC05g009390.2J;BolC06g004830.2J;BolC06g045340.2J;BolC07g041990.2J;BolC08g001570.2J;BolC09g067930.2J	K14423+K00559+K23558+K09832+K05917+K09828+K01052+K00511+K01052+K14674	Up
Proteasome	ko03050	21	300	2202	19416	BolC01g054940.2J;BolC02g002440.2J;BolC03g002530.2J;BolC03g042410.2J;BolC04g014450.2J;BolC04g016520.2J;BolC04g024150.2J;BolC04g040510.2J;BolC04g056790.2J;BolC04g058750.2J;BolC05g005700.2J;BolC05g021330.2J;BolC06g045580.2J;BolC07g016500.2J;BolC07g021800.2J;BolC07g054310.2J;BolC08g036110.2J;BolC08g053990.2J;BolC08g057360.2J;Brassica_oleracea_newGene_3762;Brassica_oleracea_newGene_7696	K03065+K03038+K03038+K06699+K02728+K03035+K03064+K02732+K03038+K03035+K02725+K02735+K02726+K03036+K03033+K03062+K03028+K03038+K02725+K02728+K02737	Up
Biosynthesis of amino acids	ko01230	67	701	2202	19416	BolC01g005160.2J;BolC01g030850.2J;BolC01g056270.2J;BolC02g019750.2J;BolC03g005380.2J;BolC03g006440.2J;BolC03g006680.2J;BolC03g014490.2J;BolC03g019750.2J;BolC03g026760.2J;BolC03g028470.2J;BolC03g028550.2J;BolC03g037400.2J;BolC03g039100.2J;BolC03g039470.2J;BolC03g062980.2J;BolC03g066840.2J;BolC03g066850.2J;BolC03g075250.2J;BolC03g078870.2J;BolC03g084910.2J;BolC04g006920.2J;BolC04g010970.2J;BolC04g0…	K01626+K01652+K22846+K00873+K14454+K00616+K01689+K00873+K10206+K15227+K13832+K01657+K01738+K05359+K00850+K00031+K01953+K01953+K01681+K00030+K00053+K01714+K01778+K00927+K00927+K00927+K01814+K00640+K00850+K01653+K00873+K00873+K00600+K01623+K01620+K00765+K00826+K00133+K00600+K01834+K00850+K01953+K00789+K00850+K01609+K00850+K00811+K14152+K01620+K01620+K01620+K00826+K00814+K00814+K14152+K01754+K01647+…	Up
Porphyrin and chlorophyll metabolism	ko00860	13	121	2202	19416	BolC01g001910.2J;BolC01g021480.2J;BolC03g033680.2J;BolC03g043500.2J;BolC03g083030.2J;BolC04g041840.2J;BolC04g067000.2J;BolC05g002770.2J;BolC05g057180.2J;BolC07g050180.2J;BolC08g059720.2J;BolC08g059740.2J;BolC09g023870.2J	K13545+K01885+K19054+K01599+K03794+K13606+K02257+K18010+K08101+K22013+K00228+K00228+K08099	Up
Selenocompound metabolism	ko00450	8	65	2202	19416	BolC03g073660.2J;BolC07g001010.2J;BolC07g004620.2J;BolC08g008060.2J;BolC09g012490.2J;Brassica_oleracea_newGene_1162;Brassica_oleracea_newGene_4014;Brassica_oleracea_newGene_5534	K00384+K00384+K13811+K01874+K00384+K13811+K13811+K13811	Up
Carotenoid biosynthesis	ko00906	6	91	2202	19416	BolC01g004780.2J;BolC04g033500.2J;BolC04g053960.2J;BolC05g041800.2J;BolC08g046930.2J;BolC08g052820.2J	K14595+K06444+K09842+K06444+K09841+K09841	Up
Glucosinolate biosynthesis	ko00966	7	137	2202	19416	BolC04g019800.2J;BolC05g007910.2J;BolC06g016330.2J;BolC06g045530.2J;BolC08g021600.2J;Brassica_oleracea_newGene_9679;Brassica_oleracea_newGene_9691	K11820+K00826+K12153+K22321+K00826+K12153+K12153	Up
Isoquinoline alkaloid biosynthesis	ko00950	10	87	2202	19416	BolC02g018560.2J;BolC03g005380.2J;BolC03g085200.2J;BolC04g065780.2J;BolC05g018550.2J;BolC07g022190.2J;BolC07g056280.2J;BolC07g056740.2J;BolC09g003110.2J;BolC09g014750.2J	K00815+K14454+K00276+K00276+K00276+K00276+K00811+K13396+K00276+K14454	Up
Basal transcription factors	ko03022	25	125	2202	19416	BolC01g004440.2J;BolC01g004540.2J;BolC01g007320.2J;BolC01g010250.2J;BolC02g007030.2J;BolC02g025910.2J;BolC02g052540.2J;BolC02g058740.2J;BolC03g056390.2J;BolC03g086250.2J;BolC04g046880.2J;BolC05g001300.2J;BolC05g001770.2J;BolC05g015050.2J;BolC05g015950.2J;BolC05g028500.2J;BolC05g062580.2J;BolC06g045370.2J;BolC07g010270.2J;BolC07g034180.2J;BolC08g001620.2J;BolC08g011420.2J;BolC08g027010.2J;BolC08g0…	K14649+K14649+K03134+K02202+K14649+K03141+K03122+K03130+K03122+K03120+K10843+K03127+K03136+K03126+K03143+K03137+K14649+K03128+K03137+K03122+K03142+K03125+K03143+K02202+K14649	Up
alpha-Linolenic acid metabolism	ko00592	19	117	2202	19416	BolC01g010220.2J;BolC01g013500.2J;BolC01g054030.2J;BolC03g019710.2J;BolC03g038630.2J;BolC04g016040.2J;BolC04g040480.2J;BolC04g041630.2J;BolC05g058870.2J;BolC05g063510.2J;BolC07g048580.2J;BolC07g054250.2J;BolC08g019440.2J;BolC08g020930.2J;BolC08g036070.2J;BolC09g009570.2J;BolC09g067930.2J;Brassica_oleracea_newGene_4598;Brassica_oleracea_newGene_6186	K10527+K22389+K10527+K07513+K10527+K07513+K00232+K16818+K10527+K22389+K22389+K10527+K10527+K05894+K00232+K00232+K14674+K18857+K10527	Up
Aminoacyl-tRNA biosynthesis	ko00970	33	388	2202	19416	BolC01g003460.2J;BolC01g012550.2J;BolC01g021480.2J;BolC02g005870.2J;BolC03g014260.2J;BolC03g036370.2J;BolC03g041090.2J;BolC03g052990.2J;BolC03g076620.2J;BolC03g079580.2J;BolC04g012930.2J;BolC04g037640.2J;BolC04g044270.2J;BolC05g012200.2J;BolC05g014780.2J;BolC05g017380.2J;BolC05g049690.2J;BolC05g060460.2J;BolC06g030980.2J;BolC07g006130.2J;BolC07g039970.2J;BolC07g058260.2J;BolC08g006670.2J;BolC08g0…	K01866+K01870+K01885+K01872+K01893+K01892+K04567+K01866+K01867+K02433+K01870+K01867+K01883+K01873+K01867+K02433+K01872+K01883+K14164+K01867+K01868+K01866+K01883+K01874+K01889+K01869+K01866+K01889+K01872+K01867+K02434+K22503+K02433	Up
Sulfur metabolism	ko00920	10	90	2202	19416	BolC02g039130.2J;BolC03g037400.2J;BolC03g085220.2J;BolC04g014810.2J;BolC05g058480.2J;BolC06g008580.2J;BolC07g004620.2J;Brassica_oleracea_newGene_1162;Brassica_oleracea_newGene_4014;Brassica_oleracea_newGene_5534	K05907+K01738+K17725+K00640+K00988+K17725+K13811+K13811+K13811+K13811	Up
Phenylalanine metabolism	ko00360	16	135	2202	19416	BolC01g040730.2J;BolC02g018560.2J;BolC03g005380.2J;BolC03g085200.2J;BolC04g065780.2J;BolC05g004680.2J;BolC05g018550.2J;BolC05g047990.2J;BolC05g051010.2J;BolC06g002890.2J;BolC06g002900.2J;BolC07g022190.2J;BolC07g056280.2J;BolC09g003110.2J;BolC09g014750.2J;BolC09g064460.2J	K10775+K00815+K14454+K00276+K00276+K00457+K00276+K01426+K00074+K01426+K01426+K00276+K00811+K00276+K14454+K01426	Up
Ascorbate and aldarate metabolism	ko00053	20	389	2202	19416	BolC01g049530.2J;BolC02g052640.2J;BolC03g046440.2J;BolC03g085520.2J;BolC06g019850.2J;BolC06g027020.2J;BolC07g034420.2J;BolC07g042590.2J;BolC07g053020.2J;BolC08g004530.2J;BolC08g007590.2J;BolC08g031420.2J;BolC09g003150.2J;BolC09g014040.2J;BolC09g058690.2J;Brassica_oleracea_newGene_3424;Brassica_oleracea_newGene_4655;Brassica_oleracea_newGene_5033;Brassica_oleracea_newGene_6544;Brassica_oleracea_ne…	K00423+K16190+K21888+K14085+K12447+K12447+K16190+K00434+K14190+K12447+K00128+K00128+K16190+K00469+K16190+K12447+K12447+K00469+K12447+K12447	Up
Galactose metabolism	ko00052	45	419	2202	19416	BolC01g018170.2J;BolC01g048980.2J;BolC01g048990.2J;BolC02g008200.2J;BolC02g010480.2J;BolC02g015850.2J;BolC02g052390.2J;BolC02g061800.2J;BolC02g063380.2J;BolC03g014110.2J;BolC03g028880.2J;BolC03g039470.2J;BolC03g068910.2J;BolC03g085790.2J;BolC03g086460.2J;BolC04g015370.2J;BolC04g037790.2J;BolC04g039680.2J;BolC05g010150.2J;BolC05g010580.2J;BolC05g024580.2J;BolC05g048000.2J;BolC05g052870.2J;BolC06g0…	K01784+K01193+K12309+K01835+K06617+K12309+K07407+K12309+K12309+K12309+K12309+K00850+K01784+K12309+K06617+K00850+K01190+K12309+K01784+K01193+K01784+K01785+K12309+K00850+K12447+K12447+K00850+K12309+K00850+K01784+K12447+K01784+K12309+K01190+K06617+K12309+K12309+K06617+K00965+K00850+K12447+K12309+K12447+K12447+K12447	Up
Glycerophospholipid metabolism	ko00564	42	322	2202	19416	BolC01g012790.2J;BolC01g013500.2J;BolC01g013600.2J;BolC01g020460.2J;BolC02g035750.2J;BolC02g037360.2J;BolC02g058510.2J;BolC02g062620.2J;BolC03g027280.2J;BolC03g037640.2J;BolC03g043980.2J;BolC03g055370.2J;BolC04g015640.2J;BolC04g016790.2J;BolC04g041630.2J;BolC04g064680.2J;BolC05g000390.2J;BolC05g003730.2J;BolC05g005180.2J;BolC05g030420.2J;BolC05g045960.2J;BolC05g051240.2J;BolC05g056910.2J;BolC05g0…	K00901+K22389+K00655+K01613+K00550+K01115+K01115+K06123+K00981+K13511+K01115+K06123+K00655+K00968+K16818+K00006+K13508+K01613+K01114+K00630+K00993+K00655+K15728+K22389+K14156+K00111+K16860+K22389+K00655+K01115+K01613+K00967+K00993+K00993+K00981+K08744+K01126+K01114+K01126+K05929+K14674+K06130	Up
Other glycan degradation	ko00511	27	140	2202	19416	BolC01g007710.2J;BolC01g048990.2J;BolC01g051670.2J;BolC02g015850.2J;BolC02g023850.2J;BolC02g024140.2J;BolC02g052030.2J;BolC02g061800.2J;BolC02g063380.2J;BolC03g002380.2J;BolC03g014110.2J;BolC03g028880.2J;BolC03g030890.2J;BolC03g068540.2J;BolC03g085790.2J;BolC04g037790.2J;BolC04g039680.2J;BolC05g052870.2J;BolC06g011920.2J;BolC07g032130.2J;BolC07g034410.2J;BolC07g043620.2J;BolC08g034830.2J;BolC08g0…	K01191+K12309+K01227+K12309+K01206+K01191+K01191+K12309+K12309+K01227+K12309+K12309+K01191+K01191+K12309+K01190+K12309+K12309+K17108+K12309+K01191+K01444+K12309+K01190+K12309+K12309+K12309	Up
Pentose and glucuronate interconversions	ko00040	41	694	2202	19416	BolC01g020190.2J;BolC01g048390.2J;BolC02g001250.2J;BolC02g010380.2J;BolC02g015040.2J;BolC02g033220.2J;BolC02g052640.2J;BolC03g063650.2J;BolC03g066620.2J;BolC04g010560.2J;BolC04g012570.2J;BolC04g023180.2J;BolC05g056920.2J;BolC06g011380.2J;BolC06g019850.2J;BolC06g027020.2J;BolC06g030150.2J;BolC06g030170.2J;BolC06g048230.2J;BolC07g032350.2J;BolC07g034420.2J;BolC07g038970.2J;BolC08g004530.2J;BolC08g0…	K01805+K01051+K01051+K01728+K01805+K01051+K16190+K01051+K00854+K00002+K00002+K01728+K01728+K00078+K12447+K12447+K01051+K01051+K01051+K01728+K16190+K01051+K12447+K01051+K01805+K16190+K01051+K01783+K01051+K01728+K01213+K01805+K00008+K01805+K01184+K16190+K01051+K12447+K12447+K12447+K12447	Up
Citrate cycle (TCA cycle)	ko00020	16	250	2202	19416	BolC01g001280.2J;BolC02g062950.2J;BolC03g017650.2J;BolC03g062980.2J;BolC03g075250.2J;BolC03g078870.2J;BolC04g017470.2J;BolC05g000770.2J;BolC05g022410.2J;BolC06g038300.2J;BolC07g042700.2J;BolC08g020990.2J;BolC08g042480.2J;BolC09g001960.2J;Brassica_oleracea_newGene_6192;Brassica_oleracea_newGene_9222	K01610+K01610+K00162+K00031+K01681+K00030+K00161+K00161+K00161+K00161+K01899+K01648+K01647+K00031+K00026+K01610	Up
Ubiquinone and other terpenoid-quinone biosynthesis	ko00130	13	114	2202	19416	BolC01g012750.2J;BolC01g024040.2J;BolC01g047410.2J;BolC02g013990.2J;BolC02g018560.2J;BolC05g004680.2J;BolC05g028510.2J;BolC05g050660.2J;BolC07g050790.2J;BolC08g027330.2J;BolC09g029470.2J;Brassica_oleracea_newGene_790;Brassica_oleracea_newGene_9968	K01904+K12501+K23095+K03809+K00815+K00457+K14760+K23095+K06125+K02552+K01904+K03809+K02552	Up
Arginine biosynthesis	ko00220	11	108	2202	19416	BolC02g003000.2J;BolC03g005380.2J;BolC03g067000.2J;BolC07g056280.2J;BolC08g026300.2J;BolC08g026350.2J;BolC08g051500.2J;BolC09g014750.2J;BolC09g033000.2J;Brassica_oleracea_newGene_4102;Brassica_oleracea_newGene_4103	K00261+K14454+K13427+K00811+K00814+K00814+K00814+K14454+K13427+K00262+K00262	Up
Circadian rhythm - plant	ko04712	52	227	2202	19416	BolC01g001840.2J;BolC01g011010.2J;BolC01g053660.2J;BolC02g000830.2J;BolC02g015500.2J;BolC02g024790.2J;BolC02g035410.2J;BolC02g047460.2J;BolC02g059060.2J;BolC02g059800.2J;BolC03g008870.2J;BolC03g027570.2J;BolC03g039130.2J;BolC03g047180.2J;BolC03g067250.2J;BolC04g000530.2J;BolC04g001700.2J;BolC04g007080.2J;BolC04g046580.2J;BolC04g053380.2J;BolC04g053420.2J;BolC05g007280.2J;BolC05g007340.2J;BolC05g0…	K12126+K03115+K12135+K12129+K12129+K12135+K03097+K03115+K12130+K16221+K12133+K16221+K12135+K12115+K16221+K12135+K12126+K16221+K16221+K12125+K12125+K12126+K12120+K12124+K12130+K16241+K12115+K12135+K12121+K16221+K03097+K12133+K12115+K16222+K12130+K12135+K12130+K12127+K03115+K12133+K12129+K12126+K12125+K12126+K12120+K12126+K12130+K12127+K16221+K16240+K12135+K12135	Up
Carbon metabolism	ko01200	87	784	2202	19416	BolC01g001280.2J;BolC01g001510.2J;BolC01g003780.2J;BolC01g003790.2J;BolC01g012240.2J;BolC01g025950.2J;BolC01g025970.2J;BolC01g032630.2J;BolC02g001600.2J;BolC02g003000.2J;BolC02g019750.2J;BolC02g048570.2J;BolC02g062950.2J;BolC02g063610.2J;BolC03g005380.2J;BolC03g006440.2J;BolC03g006680.2J;BolC03g014490.2J;BolC03g017650.2J;BolC03g037400.2J;BolC03g039470.2J;BolC03g062980.2J;BolC03g075250.2J;BolC03g0…	K01610+K01455+K03781+K03781+K01595+K01006+K01006+K01895+K01638+K00261+K00873+K00626+K01610+K05605+K14454+K00616+K01689+K00873+K00162+K01738+K00850+K00031+K01681+K23146+K00030+K00121+K01595+K00927+K00927+K00927+K00640+K00850+K03841+K03841+K00161+K03781+K00873+K00873+K00232+K00033+K00600+K01623+K15919+K00161+K01913+K00600+K00161+K01595+K00863+K00074+K01595+K01834+K00850+K01595+K15919+K00161+K01913+…	Up
Mismatch repair	ko03430	29	513	2202	19416	BolC01g006450.2J;BolC01g037680.2J;BolC01g044350.2J;BolC01g056650.2J;BolC02g021580.2J;BolC02g028260.2J;BolC02g031070.2J;BolC02g042360.2J;BolC02g045810.2J;BolC03g001550.2J;BolC03g011210.2J;BolC03g026980.2J;BolC03g055170.2J;BolC03g062580.2J;BolC04g015210.2J;BolC04g020450.2J;BolC04g028740.2J;BolC04g051250.2J;BolC04g058410.2J;BolC05g022210.2J;BolC05g036190.2J;BolC06g007410.2J;BolC06g048740.2J;BolC07g0…	K08737+K08737+K03111+K10739+K07456+K07466+K07466+K02328+K07466+K07466+K10754+K08737+K07466+K07466+K07466+K04802+K07466+K07466+K07466+K03505+K07466+K08735+K10754+K10746+K07466+K10747+K07466+K07466+K07466	Up
Histidine metabolism	ko00340	7	73	2202	19416	BolC03g085520.2J;BolC04g012720.2J;BolC05g007550.2J;BolC08g001460.2J;BolC08g007590.2J;BolC08g031420.2J;BolC08g035590.2J	K14085+K01814+K00765+K14152+K00128+K00128+K14152	Up
Purine metabolism	ko00230	50	315	2202	19416	BolC01g003930.2J;BolC01g010710.2J;BolC01g041610.2J;BolC01g041630.2J;BolC01g051420.2J;BolC01g052420.2J;BolC01g055720.2J;BolC02g008200.2J;BolC02g019750.2J;BolC02g037720.2J;BolC02g052920.2J;BolC02g059100.2J;BolC03g014100.2J;BolC03g014490.2J;BolC03g025500.2J;BolC04g002180.2J;BolC04g008750.2J;BolC04g009910.2J;BolC04g013910.2J;BolC04g032470.2J;BolC04g039530.2J;BolC04g056170.2J;BolC04g062540.2J;BolC04g0…	K00106+K01510+K01923+K01923+K13484+K01513+K14641+K01835+K00873+K00106+K10808+K01768+K14641+K00873+K18453+K01513+K00939+K01490+K00602+K00873+K00873+K01768+K11808+K01768+K00088+K00106+K00759+K01923+K14641+K00988+K00942+K00942+K00759+K01952+K00764+K13811+K10808+K10807+K01945+K10807+K01768+K18532+K00873+K13484+K13811+K13811+K13811+K01768+K01768+K01768	Up
Sphingolipid metabolism	ko00600	26	179	2202	19416	BolC01g030080.2J;BolC01g048990.2J;BolC02g015850.2J;BolC02g052390.2J;BolC02g059740.2J;BolC02g061800.2J;BolC02g063380.2J;BolC03g014110.2J;BolC03g028880.2J;BolC03g077320.2J;BolC03g085790.2J;BolC04g037790.2J;BolC04g039680.2J;BolC05g011750.2J;BolC05g031530.2J;BolC05g052870.2J;BolC06g011920.2J;BolC06g041040.2J;BolC07g032130.2J;BolC07g042530.2J;BolC08g025070.2J;BolC08g034830.2J;BolC08g038280.2J;BolC09g0…	K00654+K12309+K12309+K07407+K04718+K12309+K12309+K12309+K12309+K04718+K12309+K01190+K12309+K04713+K12349+K12309+K17108+K04713+K12309+K04718+K04713+K12309+K01190+K12309+K12309+K12309	Up
Butanoate metabolism	ko00650	12	71	2202	19416	BolC01g030850.2J;BolC01g040500.2J;BolC02g048570.2J;BolC03g011070.2J;BolC04g017440.2J;BolC05g010900.2J;BolC05g018430.2J;BolC05g051010.2J;BolC06g050360.2J;BolC07g005250.2J;BolC07g037360.2J;BolC09g027020.2J	K01652+K16871+K00626+K00109+K01653+K01640+K01913+K00074+K17761+K01913+K00626+K00626	Up
Tropane, piperidine and pyridine alkaloid biosynthesis	ko00960	15	116	2202	19416	BolC02g018560.2J;BolC03g005380.2J;BolC03g085200.2J;BolC04g055850.2J;BolC04g055920.2J;BolC04g055950.2J;BolC04g065780.2J;BolC05g018550.2J;BolC07g022190.2J;BolC07g056280.2J;BolC08g017970.2J;BolC09g003110.2J;BolC09g014750.2J;BolC09g022370.2J;BolC09g059360.2J	K00815+K14454+K00276+K08081+K08081+K08081+K00276+K00276+K00276+K00811+K08081+K00276+K14454+K08081+K08081	Up
C5-Branched dibasic acid metabolism	ko00660	2	26	2202	19416	BolC01g030850.2J;BolC04g017440.2J	K01652+K01653	Up
Photosynthesis	ko00195	9	247	2202	19416	BolC01g026900.2J;BolC04g019080.2J;BolC04g019090.2J;BolC04g022910.2J;BolC06g036370.2J;BolC07g006900.2J;Brassica_oleracea_newGene_2928;Brassica_oleracea_newGene_4238;Brassica_oleracea_newGene_818	K02111+K02717+K02717+K02639+K02723+K02111+K02111+K02111+K02111	Up
Peroxisome	ko04146	35	276	2202	19416	BolC01g003780.2J;BolC01g003790.2J;BolC01g003930.2J;BolC02g037720.2J;BolC03g001740.2J;BolC03g019710.2J;BolC03g036940.2J;BolC03g039050.2J;BolC03g062980.2J;BolC03g078000.2J;BolC04g015130.2J;BolC04g016040.2J;BolC04g023780.2J;BolC04g031180.2J;BolC04g040480.2J;BolC04g040750.2J;BolC04g056340.2J;BolC05g010900.2J;BolC05g032430.2J;BolC05g034870.2J;BolC05g058170.2J;BolC06g003120.2J;BolC07g022200.2J;BolC07g0…	K03781+K03781+K00106+K00106+K13343+K07513+K13345+K13344+K00031+K11147+K17879+K07513+K01897+K03781+K00232+K13347+K13354+K01640+K00106+K13352+K13344+K13336+K03781+K01897+K11517+K05677+K03781+K00232+K04565+K00031+K13343+K00232+K08726+K13337+K13338	Up
Terpenoid backbone biosynthesis	ko00900	15	114	2202	19416	BolC01g023970.2J;BolC02g048570.2J;BolC03g035250.2J;BolC03g056960.2J;BolC04g045720.2J;BolC06g047980.2J;BolC07g005260.2J;BolC07g037360.2J;BolC07g046790.2J;BolC09g000610.2J;BolC09g027020.2J;BolC09g043730.2J;BolC09g047200.2J;BolC09g061350.2J;Brassica_oleracea_newGene_8962	K00787+K00626+K06013+K05906+K05954+K00021+K11778+K00626+K00787+K06013+K00626+K00787+K15892+K01662+K13789	Up
RNA polymerase	ko03020	28	230	2202	19416	BolC01g014950.2J;BolC02g045370.2J;BolC02g054830.2J;BolC03g004430.2J;BolC03g047990.2J;BolC03g056060.2J;BolC03g075230.2J;BolC04g015870.2J;BolC04g025470.2J;BolC04g040280.2J;BolC05g000790.2J;BolC07g015670.2J;BolC07g015700.2J;BolC07g027390.2J;BolC07g037590.2J;BolC07g038500.2J;BolC07g042330.2J;BolC08g000280.2J;BolC08g016840.2J;BolC08g041670.2J;BolC09g003620.2J;Brassica_oleracea_newGene_1251;Brassica_ol…	K03010+K03021+K03006+K03012+K03013+K03010+K03006+K03006+K03002+K03008+K03046+K03002+K03002+K03021+K03013+K14721+K03025+K03022+K03006+K02999+K03014+K03006+K03006+K03006+K03006+K03006+K03006+K03006	Up
Cyanoamino acid metabolism	ko00460	13	256	2202	19416	BolC01g001510.2J;BolC01g056260.2J;BolC04g032580.2J;BolC04g053450.2J;BolC05g020360.2J;BolC06g016330.2J;BolC07g036120.2J;BolC08g038880.2J;BolC08g043460.2J;BolC08g043480.2J;BolC08g047770.2J;Brassica_oleracea_newGene_9679;Brassica_oleracea_newGene_9691	K01455+K01188+K01188+K00600+K00600+K12153+K01455+K05350+K01188+K01188+K20802+K12153+K12153	Up
Plant-pathogen interaction	ko04626	179	1497	2202	19416	BolC01g000330.2J;BolC01g004240.2J;BolC01g008700.2J;BolC01g012320.2J;BolC01g013150.2J;BolC01g018520.2J;BolC01g019930.2J;BolC01g022090.2J;BolC01g025070.2J;BolC01g025350.2J;BolC01g031650.2J;BolC01g035180.2J;BolC01g042110.2J;BolC01g052010.2J;BolC01g052780.2J;BolC01g053590.2J;BolC01g053960.2J;BolC01g054550.2J;BolC02g008750.2J;BolC02g009050.2J;BolC02g012410.2J;BolC02g019310.2J;BolC02g025450.2J;BolC02g0…	K01373+K18878+K05391+K13459+K16226+K13425+K13412+K13459+K15397+K01373+K13457+K13457+K13466+K13412+K13420+K09487+K13457+K16224+K16226+K16226+K16226+K13434+K18878+K13416+K13434+K13466+K16226+K16226+K16226+K16226+K16226+K16226+K13459+K13420+K13430+K13425+K13412+K13448+K16226+K18875+K13430+K13428+K04368+K13430+K16224+K13412+K13416+K13423+K13416+K16226+K16226+K14512+K13436+K13430+K16226+K16225+K16226+…	Up
Caffeine metabolism	ko00232	3	6	2202	19416	BolC01g003930.2J;BolC02g037720.2J;BolC05g032430.2J	K00106+K00106+K00106	Up
Sulfur relay system	ko04122	5	23	2202	19416	BolC03g019150.2J;BolC03g054400.2J;BolC06g047400.2J;BolC09g042700.2J;Brassica_oleracea_newGene_1633	K03639+K04487+K14168+K11996+K03639	Up
Phenylalanine, tyrosine and tryptophan biosynthesis	ko00400	37	140	3261	19416	BolC01g000540.2J;BolC01g007040.2J;BolC01g054340.2J;BolC01g056700.2J;BolC02g008560.2J;BolC02g009850.2J;BolC02g011820.2J;BolC02g028580.2J;BolC03g009540.2J;BolC03g027390.2J;BolC03g029610.2J;BolC03g036430.2J;BolC03g038270.2J;BolC03g049980.2J;BolC03g068570.2J;BolC04g044080.2J;BolC04g049140.2J;BolC04g049410.2J;BolC04g061930.2J;BolC04g067340.2J;BolC05g009350.2J;BolC05g009510.2J;BolC05g020720.2J;BolC05g0…	K00891+K00811+K13832+K13832+K00766+K14454+K05359+K00817+K13832+K00800+K00815+K13832+K13832+K01609+K01658+K06001+K00891+K15849+K01657+K00800+K01696+K05359+K01626+K01658+K01736+K13832+K13832+K00817+K01850+K01696+K01736+K01626+K01695+K01695+K05359+K00766+K01657	Down
SNARE interactions in vesicular transport	ko04130	18	107	3261	19416	BolC01g011110.2J;BolC01g024190.2J;BolC01g037740.2J;BolC01g054790.2J;BolC03g008570.2J;BolC03g027340.2J;BolC03g041180.2J;BolC04g040050.2J;BolC04g067320.2J;BolC05g010920.2J;BolC05g054840.2J;BolC05g061680.2J;BolC06g013090.2J;BolC06g018220.2J;BolC07g012260.2J;BolC07g017350.2J;BolC09g056370.2J;BolC09g063950.2J	K08488+K08493+K08490+K08489+K08488+K08495+K08486+K08486+K08495+K08517+K08486+K08486+K08492+K08493+K08490+K08500+K08488+K08486	Down
Fatty acid metabolism	ko01212	41	155	3261	19416	BolC01g023600.2J;BolC01g046660.2J;BolC02g013070.2J;BolC02g023750.2J;BolC02g055850.2J;BolC03g004560.2J;BolC03g004740.2J;BolC03g008340.2J;BolC03g017970.2J;BolC03g022670.2J;BolC03g026600.2J;BolC03g028210.2J;BolC03g050600.2J;BolC03g068930.2J;BolC04g005040.2J;BolC04g019750.2J;BolC04g040990.2J;BolC04g049390.2J;BolC04g056450.2J;BolC04g068410.2J;BolC05g006390.2J;BolC05g024550.2J;BolC05g024630.2J;BolC05g0…	K01074+K18660+K10703+K10251+K07513+K02372+K10703+K02160+K00645+K01962+K03921+K01897+K00208+K00059+K03921+K00645+K01897+K02372+K00645+K01897+K10781+K10251+K00059+K01897+K18660+K01897+K09458+K10251+K09458+K00208+K00059+K10251+K09458+K11262+K10781+K10258+K01961+K01897+K00648+K03921+K10703	Down
Sulfur relay system	ko04122	3	23	3261	19416	BolC05g014030.2J;BolC06g028640.2J;BolC06g050160.2J	K01011+K01011+K01011	Down
Ubiquitin mediated proteolysis	ko04120	59	483	3261	19416	BolC01g002190.2J;BolC01g023160.2J;BolC01g029100.2J;BolC01g043530.2J;BolC01g044660.2J;BolC01g053240.2J;BolC01g053780.2J;BolC01g056960.2J;BolC02g001000.2J;BolC02g003500.2J;BolC02g008950.2J;BolC02g022130.2J;BolC03g016240.2J;BolC03g021210.2J;BolC03g021360.2J;BolC03g027710.2J;BolC03g028120.2J;BolC03g038910.2J;BolC03g045740.2J;BolC03g049350.2J;BolC03g056100.2J;BolC03g068960.2J;BolC03g074360.2J;BolC04g0…	K10579+K06689+K10260+K10260+K08770+K06689+K10260+K10615+K10604+K10615+K10144+K10260+K06689+K10260+K02927+K10576+K02977+K10260+K10260+K10610+K10260+K10260+K10579+K03354+K10143+K10577+K02977+K03094+K02927+K10260+K10581+K10260+K10580+K10260+K10260+K10615+K10260+K10577+K10580+K03875+K10580+K06689+K02977+K10260+K10260+K03875+K10260+K02927+K10615+K10577+K02977+K10144+K10580+K10143+K10260+K10579+K08770+…	Down
Terpenoid backbone biosynthesis	ko00900	28	114	3261	19416	BolC01g002180.2J;BolC01g025890.2J;BolC01g056720.2J;BolC02g007190.2J;BolC02g028800.2J;BolC02g031040.2J;BolC02g032820.2J;BolC02g040420.2J;BolC02g048670.2J;BolC02g050420.2J;BolC03g013040.2J;BolC03g020360.2J;BolC03g058330.2J;BolC04g014360.2J;BolC05g014620.2J;BolC05g043810.2J;BolC05g062970.2J;BolC06g045920.2J;BolC06g049450.2J;BolC07g030680.2J;BolC08g011890.2J;BolC09g005360.2J;BolC09g015830.2J;BolC09g0…	K13789+K01662+K01823+K15889+K01823+K10960+K00021+K01641+K00787+K00991+K15892+K14066+K00099+K14066+K05356+K13789+K01823+K10960+K05356+K00787+K00938+K00869+K01770+K01770+K01641+K11778+K03526+K03526	Down
Pantothenate and CoA biosynthesis	ko00770	23	111	3261	19416	BolC01g002580.2J;BolC01g003540.2J;BolC01g004630.2J;BolC01g009470.2J;BolC02g000590.2J;BolC03g029100.2J;BolC03g052880.2J;BolC03g061260.2J;BolC03g074650.2J;BolC03g075060.2J;BolC03g081240.2J;BolC03g082730.2J;BolC04g058040.2J;BolC05g007900.2J;BolC06g008260.2J;BolC06g015100.2J;BolC06g024480.2J;BolC06g026320.2J;BolC07g012420.2J;BolC07g058670.2J;BolC08g032750.2J;BolC08g033700.2J;BolC09g069330.2J	K00128+K09680+K00128+K01513+K01922+K00859+K09680+K00128+K00128+K00128+K09680+K01513+K01653+K00826+K00053+K00053+K00053+K00606+K01687+K00128+K01652+K00826+K01922	Down
Autophagy - other	ko04136	14	101	3261	19416	BolC01g057180.2J;BolC02g003080.2J;BolC02g019680.2J;BolC03g025880.2J;BolC03g026740.2J;BolC03g050480.2J;BolC03g059880.2J;BolC04g004100.2J;BolC04g005230.2J;BolC04g034620.2J;BolC06g041410.2J;BolC08g015590.2J;BolC08g055990.2J;BolC09g056000.2J	K17908+K08343+K17606+K04382+K08333+K08341+K08331+K04382+K08333+K17888+K04382+K08341+K04382+K08339	Down
Isoflavonoid biosynthesis	ko00943	5	29	3261	19416	BolC01g001710.2J;BolC04g006870.2J;BolC04g051810.2J;BolC06g017220.2J;BolC07g036190.2J	K13260+K13265+K13260+K13260+K13260	Down
Monoterpenoid biosynthesis	ko00902	5	13	3261	19416	BolC01g013940.2J;BolC05g000220.2J;BolC07g033690.2J;BolC08g044320.2J;BolC08g047420.2J	K15095+K15095+K07385+K15095+K07385	Down
Aminoacyl-tRNA biosynthesis	ko00970	35	388	3261	19416	BolC01g004990.2J;BolC01g056840.2J;BolC02g048580.2J;BolC02g055970.2J;BolC03g014750.2J;BolC03g016600.2J;BolC03g020730.2J;BolC03g032980.2J;BolC03g037080.2J;BolC03g049080.2J;BolC03g050250.2J;BolC03g080770.2J;BolC04g013640.2J;BolC04g013650.2J;BolC04g053270.2J;BolC05g006410.2J;BolC05g027380.2J;BolC05g053130.2J;BolC06g015690.2J;BolC07g016960.2J;BolC07g030630.2J;BolC07g038110.2J;BolC07g047260.2J;BolC08g0…	K01876+K01866+K02433+K01870+K02433+K01867+K01883+K01869+K01867+K02434+K01868+K02435+K01883+K01883+K01867+K01872+K01880+K04567+K01870+K01866+K02433+K01870+K01883+K01893+K01872+K01874+K01889+K02433+K01868+K02433+K02433+K02433+K02433+K01870+K02433	Down
Peroxisome	ko04146	53	276	3261	19416	BolC01g004950.2J;BolC01g019500.2J;BolC01g025310.2J;BolC01g038440.2J;BolC01g044760.2J;BolC01g048330.2J;BolC01g048340.2J;BolC01g048610.2J;BolC01g051760.2J;BolC02g020450.2J;BolC02g020460.2J;BolC02g022050.2J;BolC02g055850.2J;BolC03g010520.2J;BolC03g017470.2J;BolC03g028210.2J;BolC03g029420.2J;BolC03g042080.2J;BolC03g043110.2J;BolC03g049410.2J;BolC03g050770.2J;BolC03g056940.2J;BolC03g070420.2J;BolC03g0…	K13356+K04564+K05677+K13346+K13336+K11517+K11517+K11517+K04564+K03781+K03781+K00031+K07513+K03426+K04564+K01897+K01640+K13237+K11517+K13348+K00830+K01578+K17879+K03781+K13356+K13346+K13354+K13342+K01897+K04564+K08726+K08726+K08726+K13348+K01897+K01897+K11517+K11517+K11517+K01897+K13354+K08726+K13348+K03781+K00106+K00106+K08726+K00869+K00830+K13348+K01897+K13356+K04565	Down
Caffeine metabolism	ko00232	3	6	3261	19416	BolC07g014030.2J;BolC09g001620.2J;BolC09g001630.2J	K00365+K00106+K00106	Down
Diterpenoid biosynthesis	ko00904	3	172	3261	19416	BolC01g019860.2J;BolC04g027040.2J;BolC05g001160.2J	K05282+K17982+K04125	Down
Indole alkaloid biosynthesis	ko00901	6	30	3261	19416	BolC03g025040.2J;BolC04g003130.2J;BolC04g035080.2J;BolC04g035090.2J;BolC07g000610.2J;BolC08g040930.2J	K01757+K01757+K01757+K01757+K01593+K01757	Down
Carbon fixation in photosynthetic organisms	ko00710	72	278	3261	19416	BolC01g000260.2J;BolC01g021210.2J;BolC01g050130.2J;BolC01g055690.2J;BolC02g003780.2J;BolC02g004910.2J;BolC02g009850.2J;BolC02g014320.2J;BolC02g028100.2J;BolC02g035330.2J;BolC02g043080.2J;BolC02g049080.2J;BolC02g052580.2J;BolC03g005440.2J;BolC03g042070.2J;BolC03g070490.2J;BolC03g072260.2J;BolC03g085030.2J;BolC04g006770.2J;BolC04g032090.2J;BolC04g036310.2J;BolC04g036600.2J;BolC04g038080.2J;BolC04g0…	K01623+K01623+K00927+K00134+K00026+K00029+K14454+K00051+K01807+K00927+K01601+K01807+K05298+K00029+K00927+K01595+K01623+K01595+K00615+K00615+K01100+K01803+K03841+K01623+K01602+K01602+K01602+K01803+K01623+K00026+K01595+K05298+K00134+K14272+K00855+K00855+K00927+K01807+K00026+K00026+K01595+K01595+K01602+K01100+K00134+K00029+K14272+K00927+K14272+K01807+K05298+K00029+K01783+K01623+K00025+K03841+K05298+…	Down
Protein export	ko03060	39	197	3261	19416	BolC01g001050.2J;BolC01g008490.2J;BolC01g017740.2J;BolC01g025540.2J;BolC01g045930.2J;BolC01g047110.2J;BolC02g001270.2J;BolC02g001640.2J;BolC02g020150.2J;BolC02g027310.2J;BolC03g016670.2J;BolC03g018540.2J;BolC03g020200.2J;BolC03g024140.2J;BolC03g047110.2J;BolC03g060220.2J;BolC03g084330.2J;BolC04g007170.2J;BolC04g007900.2J;BolC04g059870.2J;BolC04g066500.2J;BolC04g067640.2J;BolC05g034690.2J;BolC05g0…	K12946+K13431+K10956+K10956+K10956+K13280+K03106+K03106+K03116+K09648+K03116+K09490+K10956+K12947+K12275+K03109+K13280+K03110+K12947+K10956+K03104+K03110+K03105+K12275+K12948+K03106+K13280+K13280+K09490+K03118+K12948+K07342+K13431+K03105+K03070+K12946+K03116+K03106+K09481	Down
Glucosinolate biosynthesis	ko00966	21	137	3261	19416	BolC02g006120.2J;BolC02g030760.2J;BolC02g059950.2J;BolC03g046400.2J;BolC03g073270.2J;BolC04g004590.2J;BolC04g041440.2J;BolC05g007900.2J;BolC05g022270.2J;BolC05g044530.2J;BolC06g033020.2J;BolC06g045540.2J;BolC07g000300.2J;BolC07g000320.2J;BolC07g042920.2J;BolC07g059740.2J;BolC08g008400.2J;BolC08g033700.2J;BolC09g014990.2J;BolC09g021310.2J;BolC09g021320.2J	K21360+K11821+K15741+K21346+K11812+K21359+K12156+K00826+K11820+K21346+K11821+K11821+K11819+K11819+K15741+K11812+K01703+K00826+K22321+K22321+K22321	Down
Sphingolipid metabolism	ko00600	25	179	3261	19416	BolC01g015780.2J;BolC01g020740.2J;BolC01g028220.2J;BolC01g032390.2J;BolC01g038670.2J;BolC02g032790.2J;BolC02g041490.2J;BolC03g003950.2J;BolC03g003960.2J;BolC03g020430.2J;BolC03g068560.2J;BolC03g069710.2J;BolC04g021840.2J;BolC04g058820.2J;BolC04g067910.2J;BolC05g030450.2J;BolC05g052790.2J;BolC06g001090.2J;BolC06g017380.2J;BolC06g039330.2J;BolC07g058720.2J;BolC08g053880.2J;BolC09g068630.2J;BolC09g0…	K04711+K12309+K04708+K12309+K17108+K04708+K17108+K07407+K07407+K12382+K12309+K01634+K12309+K12309+K04718+K04708+K12309+K12309+K07407+K12309+K12309+K04710+K12309+K12382+K12382	Down
Glycosphingolipid biosynthesis - globo and isoglobo series	ko00603	7	23	3261	19416	BolC01g049890.2J;BolC03g003950.2J;BolC03g003960.2J;BolC04g036820.2J;BolC06g017380.2J;BolC06g037000.2J;BolC08g058620.2J	K01988+K07407+K07407+K12373+K07407+K12373+K12373	Down
Lipoic acid metabolism	ko00785	3	7	3261	19416	BolC02g003390.2J;BolC03g003990.2J;BolC08g049610.2J	K03644+K03644+K03644	Down
N-Glycan biosynthesis	ko00510	24	135	3261	19416	BolC01g032490.2J;BolC01g037500.2J;BolC02g034770.2J;BolC02g054930.2J;BolC03g000870.2J;BolC03g001980.2J;BolC03g011100.2J;BolC03g060320.2J;BolC04g008330.2J;BolC04g021130.2J;BolC04g034980.2J;BolC05g014470.2J;BolC05g030440.2J;BolC05g041730.2J;BolC06g036090.2J;BolC06g049710.2J;BolC07g031690.2J;BolC07g035220.2J;BolC07g049060.2J;BolC08g026070.2J;BolC08g026480.2J;BolC09g010740.2J;BolC09g012150.2J;BolC09g0…	K00902+K12669+K03843+K01230+K03850+K03844+K12668+K00779+K00729+K00729+K01001+K03844+K12668+K01230+K00737+K03843+K12666+K00737+K12667+K03844+K01230+K12670+K12345+K07252	Down
mRNA surveillance pathway	ko03015	36	349	3261	19416	BolC01g022710.2J;BolC01g033130.2J;BolC02g008890.2J;BolC03g009560.2J;BolC03g014770.2J;BolC03g025880.2J;BolC03g031010.2J;BolC03g037230.2J;BolC03g037690.2J;BolC03g042000.2J;BolC03g051500.2J;BolC03g066300.2J;BolC03g071790.2J;BolC03g079970.2J;BolC04g004100.2J;BolC04g008020.2J;BolC04g012450.2J;BolC04g020870.2J;BolC04g050650.2J;BolC04g063250.2J;BolC05g000370.2J;BolC06g013030.2J;BolC06g041410.2J;BolC07g0…	K06965+K11583+K11583+K11583+K11584+K04382+K14399+K14399+K06269+K14396+K13126+K06269+K14411+K13126+K04382+K06269+K14400+K06269+K13126+K14404+K14399+K04354+K04382+K14399+K06269+K14411+K14399+K14294+K13126+K13126+K04382+K14411+K11584+K12881+K12812+K13126	Down
Phenylalanine metabolism	ko00360	18	135	3261	19416	BolC01g007040.2J;BolC02g009850.2J;BolC02g028580.2J;BolC02g048330.2J;BolC02g063530.2J;BolC03g000330.2J;BolC03g025860.2J;BolC03g029610.2J;BolC04g011300.2J;BolC04g049410.2J;BolC04g062040.2J;BolC05g056320.2J;BolC06g043360.2J;BolC07g000610.2J;BolC07g058560.2J;BolC08g037230.2J;BolC08g056830.2J;BolC09g045740.2J	K00811+K14454+K00817+K01426+K00276+K07253+K00276+K00815+K10775+K15849+K10775+K10775+K00817+K01593+K00276+K10775+K01426+K07253	Down
Circadian rhythm - plant	ko04712	53	227	3261	19416	BolC01g045270.2J;BolC01g047570.2J;BolC01g052710.2J;BolC01g057040.2J;BolC02g003350.2J;BolC02g004670.2J;BolC02g006000.2J;BolC02g008010.2J;BolC02g026420.2J;BolC02g058470.2J;BolC02g061010.2J;BolC03g000110.2J;BolC03g001100.2J;BolC03g003910.2J;BolC03g006710.2J;BolC03g027850.2J;BolC03g029760.2J;BolC03g035520.2J;BolC03g036190.2J;BolC03g045050.2J;BolC03g058640.2J;BolC04g001800.2J;BolC04g001840.2J;BolC04g0…	K16241+K16240+K12133+K12135+K16221+K16241+K00660+K12133+K16221+K03097+K16222+K12133+K12133+K16221+K00660+K16240+K12126+K12126+K12135+K16241+K16222+K12134+K12128+K16240+K10143+K16222+K12135+K12128+K12133+K12133+K12119+K03097+K16240+K12133+K03097+K16240+K16222+K16222+K16222+K12126+K12126+K03097+K12135+K10143+K16221+K12131+K12133+K12135+K00660+K16241+K16221+K12135+K12135	Down
Fatty acid biosynthesis	ko00061	32	105	3261	19416	BolC01g046660.2J;BolC03g004560.2J;BolC03g008340.2J;BolC03g017970.2J;BolC03g022670.2J;BolC03g026600.2J;BolC03g028210.2J;BolC03g049730.2J;BolC03g050600.2J;BolC03g068930.2J;BolC04g005040.2J;BolC04g019750.2J;BolC04g040990.2J;BolC04g049390.2J;BolC04g056450.2J;BolC04g068410.2J;BolC05g006390.2J;BolC05g024630.2J;BolC05g033660.2J;BolC05g050100.2J;BolC06g029710.2J;BolC06g031220.2J;BolC06g046250.2J;BolC07g0…	K18660+K02372+K02160+K00645+K01962+K03921+K01897+K10782+K00208+K00059+K03921+K00645+K01897+K02372+K00645+K01897+K10781+K00059+K01897+K18660+K01897+K09458+K09458+K00208+K00059+K09458+K11262+K10781+K01961+K01897+K00648+K03921	Down
Starch and sucrose metabolism	ko00500	129	629	3261	19416	BolC01g000770.2J;BolC01g009470.2J;BolC01g011890.2J;BolC01g015970.2J;BolC01g019030.2J;BolC01g019040.2J;BolC01g021300.2J;BolC01g024000.2J;BolC01g027030.2J;BolC01g044800.2J;BolC01g050670.2J;BolC01g053170.2J;BolC01g057260.2J;BolC02g008270.2J;BolC02g009430.2J;BolC02g010990.2J;BolC02g020910.2J;BolC02g021870.2J;BolC02g022240.2J;BolC02g025970.2J;BolC02g032090.2J;BolC02g036250.2J;BolC02g041410.2J;BolC02g0…	K01087+K01513+K19892+K01087+K01810+K01810+K01179+K01177+K01176+K05350+K01188+K01176+K00703+K00695+K00975+K05349+K01087+K01179+K19891+K19891+K01179+K00750+K00696+K19891+K01087+K19892+K05349+K01188+K01187+K00963+K00963+K01188+K01188+K19891+K01179+K07024+K01188+K19891+K01087+K01176+K00700+K00703+K01513+K07024+K00705+K19891+K01214+K01179+K01188+K01177+K19891+K01188+K19892+K19891+K01188+K01087+K00847+…	Down
Phagosome	ko04145	86	257	3261	19416	BolC01g000240.2J;BolC01g003850.2J;BolC01g004690.2J;BolC01g006610.2J;BolC01g011110.2J;BolC01g017740.2J;BolC01g017930.2J;BolC01g025540.2J;BolC01g031400.2J;BolC01g045820.2J;BolC01g045930.2J;BolC01g048500.2J;BolC01g057590.2J;BolC02g032520.2J;BolC02g038080.2J;BolC02g040880.2J;BolC02g044480.2J;BolC02g057270.2J;BolC03g008570.2J;BolC03g010350.2J;BolC03g020200.2J;BolC03g028840.2J;BolC03g031560.2J;BolC03g0…	K02155+K04392+K02144+K03661+K08488+K10956+K02152+K10956+K07375+K02155+K10956+K00921+K02152+K01368+K02151+K02150+K07375+K07374+K08488+K07374+K10956+K02154+K07897+K02151+K02152+K02155+K07375+K07375+K07375+K02155+K02154+K02155+K03661+K07374+K07897+K07375+K02149+K02154+K10956+K02148+K08517+K02155+K00921+K02147+K07897+K07374+K02152+K07374+K08492+K02149+K04392+K04392+K02147+K02145+K04392+K02147+K07375+…	Down
Fatty acid elongation	ko00062	23	75	3261	19416	BolC01g023600.2J;BolC02g013070.2J;BolC02g023750.2J;BolC02g043870.2J;BolC03g000080.2J;BolC03g004740.2J;BolC04g001900.2J;BolC04g021640.2J;BolC04g053590.2J;BolC05g000740.2J;BolC05g002410.2J;BolC05g023950.2J;BolC05g024550.2J;BolC06g035640.2J;BolC06g038950.2J;BolC07g006980.2J;BolC07g017840.2J;BolC07g025450.2J;BolC08g039280.2J;BolC08g060390.2J;BolC09g062230.2J;BolC09g067050.2J;Brassica_oleracea_newGene…	K01074+K10703+K10251+K15397+K15397+K10703+K15397+K15397+K15397+K15397+K15397+K15397+K10251+K15397+K10251+K15397+K10251+K15397+K10258+K15397+K10703+K15397+K15397	Down
Other types of O-glycan biosynthesis	ko00514	9	33	3261	19416	BolC02g021310.2J;BolC02g058620.2J;BolC03g035660.2J;BolC03g060320.2J;BolC04g003290.2J;BolC04g060730.2J;BolC05g012800.2J;BolC06g008750.2J;BolC08g025470.2J	K03691+K20782+K20781+K00779+K18134+K20784+K20784+K03691+K20784	Down
Nitrogen metabolism	ko00910	24	133	3261	19416	BolC01g001500.2J;BolC01g057480.2J;BolC01g057510.2J;BolC02g006420.2J;BolC02g006560.2J;BolC02g007550.2J;BolC02g007880.2J;BolC02g022220.2J;BolC02g027190.2J;BolC03g003400.2J;BolC03g045300.2J;BolC03g064500.2J;BolC03g080440.2J;BolC04g042400.2J;BolC04g043330.2J;BolC05g062140.2J;BolC06g029570.2J;BolC06g041790.2J;BolC06g048810.2J;BolC08g012040.2J;BolC08g036780.2J;BolC09g011880.2J;BolC09g056690.2J;BolC09g0…	K01455+K01673+K01673+K02575+K01673+K01915+K00366+K01915+K01673+K00261+K01915+K01501+K01673+K01915+K01915+K01673+K10534+K01673+K10534+K01915+K01674+K00366+K01915+K00284	Down
Other glycan degradation	ko00511	24	140	3261	19416	BolC01g004610.2J;BolC01g020740.2J;BolC01g032390.2J;BolC01g038670.2J;BolC02g041490.2J;BolC03g006740.2J;BolC03g068560.2J;BolC04g021840.2J;BolC04g036820.2J;BolC04g058820.2J;BolC05g013090.2J;BolC05g052790.2J;BolC05g060400.2J;BolC06g001090.2J;BolC06g037000.2J;BolC06g039330.2J;BolC07g016740.2J;BolC07g058720.2J;BolC08g032590.2J;BolC08g058620.2J;BolC09g021830.2J;BolC09g058710.2J;BolC09g068630.2J;Brassica…	K15923+K12309+K12309+K17108+K17108+K01191+K12309+K12309+K12373+K12309+K01191+K12309+K01206+K12309+K12373+K12309+K01206+K12309+K01206+K12373+K01206+K01206+K12309+K15923	Down
Pentose phosphate pathway	ko00030	51	156	3261	19416	BolC01g000260.2J;BolC01g009960.2J;BolC01g009980.2J;BolC01g019030.2J;BolC01g019040.2J;BolC01g021210.2J;BolC02g028100.2J;BolC02g049080.2J;BolC03g072260.2J;BolC04g006770.2J;BolC04g032090.2J;BolC04g038080.2J;BolC04g039600.2J;BolC04g048770.2J;BolC04g051550.2J;BolC04g061680.2J;BolC05g010590.2J;BolC05g010820.2J;BolC05g014830.2J;BolC05g018960.2J;BolC05g021540.2J;BolC05g024040.2J;BolC05g056520.2J;BolC05g0…	K01623+K00850+K00850+K01810+K01810+K01623+K01807+K01807+K01623+K00615+K00615+K03841+K01623+K01623+K00131+K00850+K00616+K00895+K00852+K00895+K01835+K01810+K00850+K01807+K00033+K00036+K00850+K01810+K01807+K01057+K01057+K01783+K01810+K01623+K03841+K00036+K00895+K01835+K00850+K03841+K00615+K00131+K00850+K01623+K01057+K00036+K00851+K01835+K00036+K01783+K01807	Down
Inositol phosphate metabolism	ko00562	62	240	3261	19416	BolC01g000820.2J;BolC01g011490.2J;BolC01g011550.2J;BolC01g027480.2J;BolC01g030270.2J;BolC01g043450.2J;BolC01g048500.2J;BolC01g048560.2J;BolC02g014060.2J;BolC02g014090.2J;BolC02g023990.2J;BolC02g037070.2J;BolC02g048430.2J;BolC02g061910.2J;BolC03g008520.2J;BolC03g035180.2J;BolC03g036460.2J;BolC03g046260.2J;BolC03g051150.2J;BolC03g056840.2J;BolC03g056860.2J;BolC03g072440.2J;BolC04g001810.2J;BolC04g0…	K01858+K01092+K24221+K21797+K01114+K01110+K00921+K22913+K05857+K05857+K00999+K01092+K10047+K15422+K00913+K01092+K10047+K01110+K00913+K15422+K15422+K18649+K01092+K18081+K01803+K01803+K01858+K01114+K00921+K01092+K22913+K00889+K10047+K20279+K20279+K18081+K22913+K20279+K20279+K20279+K20279+K18081+K22913+K10572+K05857+K24221+K24221+K10572+K00921+K21797+K01803+K18081+K01858+K01803+K03103+K01092+K15422+…	Down
Carbon metabolism	ko01200	208	784	3261	19416	BolC01g000260.2J;BolC01g001230.2J;BolC01g001500.2J;BolC01g003640.2J;BolC01g004680.2J;BolC01g005590.2J;BolC01g009960.2J;BolC01g009980.2J;BolC01g015470.2J;BolC01g019030.2J;BolC01g019040.2J;BolC01g021210.2J;BolC01g025400.2J;BolC01g026690.2J;BolC01g028250.2J;BolC01g029710.2J;BolC01g036380.2J;BolC01g048330.2J;BolC01g048340.2J;BolC01g048610.2J;BolC01g050130.2J;BolC01g055690.2J;BolC02g003320.2J;BolC02g0…	K01623+K00600+K01455+K00030+K00058+K00281+K00850+K00850+K00121+K01810+K01810+K01623+K00382+K01738+K15634+K00873+K00605+K11517+K11517+K11517+K00927+K00134+K01899+K00026+K00029+K14454+K00051+K03781+K03781+K00162+K00031+K01807+K15634+K00927+K15918+K01601+K01807+K05298+K00261+K01899+K00873+K00029+K02160+K00640+K01689+K01962+K00927+K00627+K11517+K00382+K00058+K05605+K01681+K00830+K00640+K00873+K01595+…	Down
Histidine metabolism	ko00340	19	73	3261	19416	BolC01g002580.2J;BolC01g004630.2J;BolC01g021800.2J;BolC01g040310.2J;BolC02g028580.2J;BolC02g055830.2J;BolC03g021390.2J;BolC03g057020.2J;BolC03g061260.2J;BolC03g072440.2J;BolC03g074650.2J;BolC03g075060.2J;BolC05g035450.2J;BolC05g040150.2J;BolC06g043360.2J;BolC07g058670.2J;BolC09g008970.2J;BolC09g022110.2J;BolC09g022170.2J	K00128+K00128+K01663+K01693+K00817+K14152+K01814+K00013+K00128+K18649+K00128+K00128+K01590+K01693+K00817+K00128+K00013+K01590+K01590	Down
Tryptophan metabolism	ko00380	45	212	3261	19416	BolC01g002580.2J;BolC01g004630.2J;BolC01g019080.2J;BolC01g025400.2J;BolC01g040420.2J;BolC01g047370.2J;BolC02g020450.2J;BolC02g020460.2J;BolC02g027420.2J;BolC02g030760.2J;BolC02g048330.2J;BolC02g057540.2J;BolC02g057570.2J;BolC02g057910.2J;BolC02g057960.2J;BolC02g058040.2J;BolC02g058070.2J;BolC02g058090.2J;BolC02g058100.2J;BolC03g044650.2J;BolC03g061260.2J;BolC03g064500.2J;BolC03g068040.2J;BolC03g0…	K00128+K00128+K16903+K00382+K01237+K23947+K03781+K03781+K16903+K11821+K01426+K01237+K01237+K01237+K01237+K01237+K01237+K01237+K01237+K00382+K00128+K01501+K22450+K11812+K00128+K00128+K22588+K03781+K23947+K11820+K00382+K11821+K11821+K11819+K11819+K01593+K03781+K00128+K11812+K23947+K01426+K01237+K01237+K01237+K11817	Down
C5-Branched dibasic acid metabolism	ko00660	5	26	3261	19416	BolC02g035990.2J;BolC03g026160.2J;BolC04g058040.2J;BolC08g008400.2J;BolC08g032750.2J	K00052+K01704+K01653+K01703+K01652	Down
Cutin, suberine and wax biosynthesis	ko00073	27	164	3261	19416	BolC01g004950.2J;BolC02g014790.2J;BolC02g027530.2J;BolC02g036740.2J;BolC02g042830.2J;BolC03g001920.2J;BolC03g020940.2J;BolC03g027480.2J;BolC03g027500.2J;BolC03g080310.2J;BolC04g010640.2J;BolC04g015690.2J;BolC04g062550.2J;BolC04g062560.2J;BolC05g000400.2J;BolC05g055990.2J;BolC06g017390.2J;BolC06g042110.2J;BolC08g033280.2J;BolC08g061020.2J;BolC09g000310.2J;BolC09g021550.2J;BolC09g021560.2J;BolC09g0…	K13356+K15404+K17991+K15398+K15405+K21995+K15406+K20495+K20495+K13356+K15404+K17991+K15404+K15404+K15398+K21995+K15406+K17991+K15406+K15404+K15398+K15405+K15405+K15405+K15404+K13356+K15400	Down
Non-homologous end-joining	ko03450	1	17	3261	19416	BolC07g040230.2J	K04799	Down
Isoquinoline alkaloid biosynthesis	ko00950	9	87	3261	19416	BolC01g007040.2J;BolC01g010540.2J;BolC02g009850.2J;BolC02g063530.2J;BolC03g025860.2J;BolC03g029610.2J;BolC04g049410.2J;BolC07g000610.2J;BolC07g058560.2J	K00811+K01592+K14454+K00276+K00276+K00815+K15849+K01593+K00276	Down
Pentose and glucuronate interconversions	ko00040	67	694	3261	19416	BolC01g017270.2J;BolC01g017320.2J;BolC01g029640.2J;BolC01g051910.2J;BolC01g051950.2J;BolC02g003830.2J;BolC02g003850.2J;BolC02g006980.2J;BolC02g007990.2J;BolC02g009980.2J;BolC02g019250.2J;BolC02g023780.2J;BolC02g033230.2J;BolC02g033580.2J;BolC02g045910.2J;BolC02g050730.2J;BolC02g054340.2J;BolC02g056100.2J;BolC03g008880.2J;BolC03g008900.2J;BolC03g022350.2J;BolC03g035710.2J;BolC03g043090.2J;BolC03g0…	K01184+K01184+K01051+K01051+K01051+K01051+K01051+K00012+K12447+K01051+K01051+K01728+K01051+K12447+K01728+K01213+K01051+K01184+K00963+K00963+K00002+K16190+K01051+K12447+K01213+K01051+K01051+K00002+K01184+K01728+K01728+K00012+K01184+K01051+K00012+K01051+K00963+K01213+K01051+K01051+K00012+K01184+K01728+K01805+K01051+K01213+K01184+K01783+K01184+K16190+K01051+K00002+K01051+K12447+K22935+K01728+K01728+…	Down
Homologous recombination	ko03440	26	620	3261	19416	BolC01g010740.2J;BolC02g032250.2J;BolC02g034980.2J;BolC02g036760.2J;BolC02g058940.2J;BolC03g020480.2J;BolC03g072080.2J;BolC04g024390.2J;BolC04g059670.2J;BolC05g006490.2J;BolC05g006910.2J;BolC05g008520.2J;BolC05g015860.2J;BolC06g048590.2J;BolC08g016260.2J;BolC08g022400.2J;BolC08g055630.2J;BolC09g030890.2J;Brassica_oleracea_newGene_1661;Brassica_oleracea_newGene_2678;Brassica_oleracea_newGene_2714;…	K07466+K12173+K03553+K07466+K12173+K03655+K12173+K12173+K07466+K02327+K07466+K07466+K12173+K10728+K10875+K10901+K10901+K08991+K07466+K07466+K07466+K07466+K10881+K10881+K07466+K07466	Down
Photosynthesis	ko00195	82	247	3261	19416	BolC01g006890.2J;BolC01g010440.2J;BolC01g010560.2J;BolC01g014490.2J;BolC01g036290.2J;BolC01g038980.2J;BolC01g038990.2J;BolC01g046690.2J;BolC01g057540.2J;BolC02g023760.2J;BolC02g034970.2J;BolC02g043070.2J;BolC02g061950.2J;BolC02g063450.2J;BolC02g063540.2J;BolC02g063560.2J;BolC03g031540.2J;BolC03g033140.2J;BolC03g033660.2J;BolC03g056790.2J;BolC03g071620.2J;BolC03g084160.2J;BolC04g008510.2J;BolC04g0…	K02109+K02693+K08903+K08901+K02639+K02112+K02112+K02695+K08901+K02723+K03541+K02112+K02701+K02716+K02641+K02641+K02113+K02115+K02636+K02701+K02698+K02695+K02717+K02721+K02639+K02639+K02717+K02699+K02639+K02717+K02721+K08902+K02717+K02721+K14332+K02639+K08901+K02638+K02717+K02698+K02694+K02695+K08901+K03542+K02695+K08905+K08905+K03541+K02723+K02638+K03541+K08901+K02641+K02716+K02716+K08902+K02717+…	Down
Biosynthesis of amino acids	ko01230	194	701	3261	19416	BolC01g000040.2J;BolC01g000260.2J;BolC01g000540.2J;BolC01g001230.2J;BolC01g001450.2J;BolC01g003640.2J;BolC01g004680.2J;BolC01g007040.2J;BolC01g009960.2J;BolC01g009980.2J;BolC01g013420.2J;BolC01g021210.2J;BolC01g021800.2J;BolC01g026690.2J;BolC01g028250.2J;BolC01g029710.2J;BolC01g040310.2J;BolC01g050130.2J;BolC01g054340.2J;BolC01g055690.2J;BolC01g056700.2J;BolC02g007550.2J;BolC02g008490.2J;BolC02g0…	K14677+K01623+K00891+K00600+K14682+K00030+K00058+K00811+K00850+K00850+K12524+K01623+K01663+K01738+K15634+K00873+K01693+K00927+K13832+K00134+K13832+K01915+K00549+K00766+K14454+K05359+K00928+K00031+K01915+K00549+K01807+K00817+K15634+K00927+K00818+K00052+K01807+K14152+K00873+K01953+K01586+K00928+K00549+K13832+K00640+K01814+K01689+K00789+K01704+K00800+K13832+K00549+K13832+K00927+K00789+K01915+K00058+…	Down
MAPK signaling pathway - plant	ko04016	141	1141	3261	19416	BolC01g001850.2J;BolC01g005150.2J;BolC01g007580.2J;BolC01g011310.2J;BolC01g017950.2J;BolC01g019540.2J;BolC01g021770.2J;BolC01g035020.2J;BolC01g044260.2J;BolC01g048120.2J;BolC02g000300.2J;BolC02g008800.2J;BolC02g011210.2J;BolC02g013230.2J;BolC02g013240.2J;BolC02g013250.2J;BolC02g019480.2J;BolC02g019840.2J;BolC02g020450.2J;BolC02g020460.2J;BolC02g030350.2J;BolC02g035460.2J;BolC02g037030.2J;BolC02g0…	K20716+K17686+K13425+K13422+K13416+K20728+K20716+K20535+K20725+K13420+K14497+K13420+K02183+K16224+K16224+K16224+K14496+K13425+K03781+K03781+K20604+K16224+K13425+K00940+K20538+K13447+K20728+K20600+K02183+K02183+K16224+K16224+K16224+K13424+K13424+K02183+K14514+K17686+K20547+K20547+K20547+K13413+K13449+K02183+K14498+K20718+K02183+K02183+K20536+K20557+K03781+K17686+K13425+K20728+K00940+K13422+K13424+…	Down
Cyanoamino acid metabolism	ko00460	46	256	3261	19416	BolC01g000670.2J;BolC01g001230.2J;BolC01g001500.2J;BolC01g044800.2J;BolC01g050670.2J;BolC02g010990.2J;BolC02g011540.2J;BolC02g029880.2J;BolC03g002080.2J;BolC03g003150.2J;BolC03g013050.2J;BolC03g013060.2J;BolC03g028380.2J;BolC03g064500.2J;BolC03g073550.2J;BolC03g081120.2J;BolC04g016340.2J;BolC04g030520.2J;BolC04g031550.2J;BolC04g041220.2J;BolC04g042740.2J;BolC04g045440.2J;BolC04g050790.2J;BolC04g0…	K18592+K00600+K01455+K05350+K01188+K05349+K13035+K08248+K05349+K01188+K01188+K01188+K01188+K01501+K00600+K00600+K01188+K01188+K13034+K00600+K01188+K20802+K20802+K20802+K01188+K01188+K05350+K01188+K01188+K00600+K00600+K01188+K01188+K01188+K01188+K01188+K01188+K01188+K20802+K00600+K13034+K01188+K01188+K05349+K20802+K01188	Down
Glyoxylate and dicarboxylate metabolism	ko00630	74	354	3261	19416	BolC01g001230.2J;BolC01g001500.2J;BolC01g005590.2J;BolC01g023770.2J;BolC01g025400.2J;BolC01g036380.2J;BolC01g048330.2J;BolC01g048340.2J;BolC01g048610.2J;BolC02g003780.2J;BolC02g007550.2J;BolC02g020450.2J;BolC02g020460.2J;BolC02g022220.2J;BolC02g036130.2J;BolC02g043080.2J;BolC03g011980.2J;BolC03g043110.2J;BolC03g044650.2J;BolC03g045300.2J;BolC03g050490.2J;BolC03g050770.2J;BolC03g054660.2J;BolC03g0…	K00600+K01455+K00281+K01433+K00382+K00605+K11517+K11517+K11517+K00026+K01915+K03781+K03781+K01915+K15918+K01601+K22133+K11517+K00382+K01915+K01681+K00830+K22133+K22133+K00600+K03781+K00600+K02437+K02437+K00600+K01915+K19269+K01915+K01602+K01602+K01602+K00026+K18121+K01637+K14272+K02437+K02437+K01913+K11517+K11517+K11517+K00382+K00026+K00026+K01602+K01647+K15918+K00600+K22133+K22133+K14272+K00600+…	Down
Benzoxazinoid biosynthesis	ko00402	4	31	3261	19416	BolC03g009650.2J;BolC05g004700.2J;BolC08g058080.2J;BolC08g058100.2J	K13229+K13229+K13229+K13229	Down
Steroid biosynthesis	ko00100	19	88	3261	19416	BolC01g001390.2J;BolC01g004150.2J;BolC01g004160.2J;BolC01g043070.2J;BolC02g005850.2J;BolC02g034350.2J;BolC03g050530.2J;BolC03g079560.2J;BolC03g083190.2J;BolC05g062840.2J;BolC06g020320.2J;BolC07g014060.2J;BolC07g022640.2J;BolC07g057790.2J;BolC07g057800.2J;BolC08g046330.2J;BolC08g057630.2J;BolC09g006850.2J;BolC09g021030.2J	K00511+K00801+K00801+K09828+K00559+K08242+K01853+K00801+K00213+K00227+K00222+K01853+K01824+K00801+K00801+K23558+K14424+K00511+K00511	Down
Arginine biosynthesis	ko00220	26	108	3261	19416	BolC01g000040.2J;BolC01g001450.2J;BolC01g007040.2J;BolC02g007550.2J;BolC02g009850.2J;BolC02g022220.2J;BolC02g023590.2J;BolC02g035950.2J;BolC03g003400.2J;BolC03g045300.2J;BolC04g034520.2J;BolC04g042400.2J;BolC04g043330.2J;BolC04g062380.2J;BolC05g021660.2J;BolC06g030890.2J;BolC06g042010.2J;BolC07g020180.2J;BolC07g047250.2J;BolC07g059540.2J;BolC08g012040.2J;BolC08g030530.2J;BolC09g017670.2J;BolC09g0…	K14677+K14682+K00811+K01915+K14454+K01915+K01427+K00818+K00261+K01915+K00930+K01915+K01915+K00620+K14272+K00611+K14272+K14272+K01438+K14682+K01915+K14272+K00145+K01915+K01940+K01940	Down
Sesquiterpenoid and triterpenoid biosynthesis	ko00909	11	85	3261	19416	BolC01g001390.2J;BolC01g004150.2J;BolC01g004160.2J;BolC03g009980.2J;BolC03g079560.2J;BolC06g028970.2J;BolC06g049900.2J;BolC07g057790.2J;BolC07g057800.2J;BolC09g006850.2J;BolC09g021030.2J	K00511+K00801+K00801+K15803+K00801+K15815+K15815+K00801+K00801+K00511+K00511	Down
Glycerophospholipid metabolism	ko00564	59	322	3261	19416	BolC01g008740.2J;BolC01g021510.2J;BolC01g026400.2J;BolC01g030270.2J;BolC01g047090.2J;BolC01g052740.2J;BolC02g003190.2J;BolC02g008940.2J;BolC02g010280.2J;BolC02g023990.2J;BolC02g031360.2J;BolC02g036690.2J;BolC02g051710.2J;BolC02g061770.2J;BolC03g003670.2J;BolC03g004470.2J;BolC03g010510.2J;BolC03g025200.2J;BolC03g032400.2J;BolC03g034690.2J;BolC03g043930.2J;BolC03g057150.2J;BolC04g013660.2J;BolC04g0…	K00901+K01126+K00968+K01114+K01115+K15728+K00901+K16818+K06130+K00999+K13513+K01115+K00993+K00901+K00901+K06123+K06130+K00006+K01115+K13508+K06130+K00901+K00655+K00894+K13523+K00006+K18696+K01126+K01126+K01114+K01115+K00655+K00993+K00993+K16818+K00630+K05929+K06130+K18693+K16818+K05929+K00006+K13523+K01094+K05929+K01126+K01047+K00901+K06129+K18693+K00993+K06130+K16818+K00630+K00655+K00981+K00968+…	Down
Glycosphingolipid biosynthesis - lacto and neolacto series	ko00601	1	9	3261	19416	BolC01g049890.2J	K01988	Down
Thiamine metabolism	ko00730	15	46	3261	19416	BolC01g021220.2J;BolC01g025890.2J;BolC03g022040.2J;BolC03g035590.2J;BolC03g040790.2J;BolC03g064070.2J;BolC04g020410.2J;BolC05g055500.2J;BolC07g037130.2J;BolC07g043580.2J;BolC08g012270.2J;BolC08g023970.2J;BolC08g054760.2J;BolC09g004230.2J;BolC09g008650.2J	K22911+K01662+K00939+K00939+K20896+K14394+K03147+K20896+K00939+K22911+K00939+K22911+K22911+K00939+K00939	Down
Fructose and mannose metabolism	ko00051	47	179	3261	19416	BolC01g000260.2J;BolC01g009960.2J;BolC01g009980.2J;BolC01g021210.2J;BolC01g023470.2J;BolC02g031290.2J;BolC03g023990.2J;BolC03g027640.2J;BolC03g072260.2J;BolC04g007180.2J;BolC04g036600.2J;BolC04g038080.2J;BolC04g039600.2J;BolC04g048600.2J;BolC04g048770.2J;BolC04g057900.2J;BolC04g061680.2J;BolC04g063870.2J;BolC05g010820.2J;BolC05g015550.2J;BolC05g018960.2J;BolC05g044020.2J;BolC05g056520.2J;BolC06g0…	K01623+K00850+K00850+K01623+K19355+K00966+K00966+K17497+K01623+K17497+K01803+K03841+K01623+K01803+K01623+K00847+K00850+K00966+K00895+K02377+K00895+K00844+K00850+K00844+K00850+K00847+K00966+K19355+K01805+K19355+K01711+K01623+K01103+K03841+K00895+K01711+K00850+K03841+K01803+K00850+K01623+K01803+K01103+K19355+K00844+K00847+K01809	Down
Glycine, serine and threonine metabolism	ko00260	60	209	3261	19416	BolC01g001230.2J;BolC01g004680.2J;BolC01g005590.2J;BolC01g013420.2J;BolC01g025400.2J;BolC01g028250.2J;BolC01g036380.2J;BolC02g017330.2J;BolC02g032760.2J;BolC02g036130.2J;BolC02g063530.2J;BolC03g006860.2J;BolC03g025860.2J;BolC03g044650.2J;BolC03g046240.2J;BolC03g050770.2J;BolC03g052810.2J;BolC03g052840.2J;BolC03g061010.2J;BolC03g073550.2J;BolC03g075090.2J;BolC03g081120.2J;BolC03g082590.2J;BolC04g0…	K00600+K00058+K00281+K12524+K00382+K15634+K00605+K00928+K15634+K15918+K00276+K00928+K00276+K00382+K00058+K00830+K00872+K00872+K00130+K00600+K00831+K00600+K01733+K02437+K02437+K00600+K06001+K01696+K14272+K02437+K02437+K15633+K01620+K00382+K15918+K00600+K14272+K00600+K00872+K14272+K01696+K00058+K00276+K00600+K02437+K15633+K00605+K00133+K00133+K00058+K14272+K01695+K00108+K15919+K00605+K01620+K01695+…	Down
Various types of N-glycan biosynthesis	ko00513	18	95	3261	19416	BolC01g037500.2J;BolC02g034770.2J;BolC02g054930.2J;BolC03g001980.2J;BolC03g011100.2J;BolC04g036820.2J;BolC05g014470.2J;BolC05g030440.2J;BolC05g041730.2J;BolC06g037000.2J;BolC06g043440.2J;BolC06g049710.2J;BolC07g031690.2J;BolC07g049060.2J;BolC08g026070.2J;BolC08g026480.2J;BolC08g058620.2J;BolC09g010740.2J	K12669+K03843+K01230+K03844+K12668+K12373+K03844+K12668+K01230+K12373+K14412+K03843+K12666+K12667+K03844+K01230+K12373+K12670	Down
Nicotinate and nicotinamide metabolism	ko00760	15	52	3261	19416	BolC01g009470.2J;BolC02g003570.2J;BolC03g010520.2J;BolC03g021410.2J;BolC03g047150.2J;BolC03g082730.2J;BolC03g085750.2J;BolC04g012630.2J;BolC05g042130.2J;BolC06g030930.2J;BolC06g036230.2J;BolC06g049490.2J;BolC07g059230.2J;BolC08g047860.2J;BolC09g058420.2J	K01513+K11414+K03426+K01240+K00858+K01513+K01950+K01240+K00858+K01081+K03517+K00858+K00763+K00763+K00278	Down
Ribosome	ko03010	333	783	3261	19416	BolC01g000880.2J;BolC01g004180.2J;BolC01g007350.2J;BolC01g009750.2J;BolC01g009770.2J;BolC01g012450.2J;BolC01g017710.2J;BolC01g020160.2J;BolC01g021970.2J;BolC01g024470.2J;BolC01g026540.2J;BolC01g029830.2J;BolC01g029860.2J;BolC01g032820.2J;BolC01g038880.2J;BolC01g044210.2J;BolC01g047700.2J;BolC01g050490.2J;BolC01g051180.2J;BolC01g052760.2J;BolC01g053010.2J;BolC01g054110.2J;BolC01g054860.2J;BolC01g0…	K02892+K02959+K02991+K02957+K02903+K02868+K02897+K02947+K02875+K02877+K02901+K02873+K02949+K02939+K02929+K02908+K02968+K02864+K02955+K02918+K02941+K02905+K02883+K02891+K02974+K02984+K02993+K02966+K02973+K02979+K02962+K02987+K02991+K02884+K02864+K02997+K02995+K02957+K02942+K02910+K02983+K02895+K02969+K02915+K02866+K02900+K02998+K02917+K02952+K02871+K02940+K02925+K02940+K02868+K02937+K02935+K02872+…	Down
Amino sugar and nucleotide sugar metabolism	ko00520	96	867	3261	19416	BolC01g008610.2J;BolC01g019030.2J;BolC01g019040.2J;BolC01g032000.2J;BolC01g038290.2J;BolC01g047980.2J;BolC01g057060.2J;BolC01g057120.2J;BolC02g006980.2J;BolC02g007080.2J;BolC02g007990.2J;BolC02g008340.2J;BolC02g009430.2J;BolC02g031290.2J;BolC02g033580.2J;BolC02g062270.2J;BolC03g005830.2J;BolC03g007770.2J;BolC03g008880.2J;BolC03g008900.2J;BolC03g010530.2J;BolC03g023270.2J;BolC03g023990.2J;BolC03g0…	K08679+K01810+K01810+K08678+K08679+K12450+K13648+K13379+K00012+K13379+K12447+K00326+K00975+K00966+K12447+K15920+K01097+K13379+K00963+K00963+K00326+K13648+K00966+K17497+K13379+K16190+K20547+K20547+K20547+K12447+K13648+K17497+K12448+K08678+K13648+K12373+K01183+K00012+K08678+K00847+K01183+K00966+K00770+K20547+K12451+K12450+K02377+K01835+K00012+K01810+K00972+K00844+K15920+K12450+K13379+K00963+K00844+…	Down
Glycosaminoglycan degradation	ko00531	14	79	3261	19416	BolC01g020740.2J;BolC01g032390.2J;BolC02g005840.2J;BolC03g068560.2J;BolC04g021840.2J;BolC04g036820.2J;BolC04g058820.2J;BolC05g052790.2J;BolC06g001090.2J;BolC06g037000.2J;BolC06g039330.2J;BolC07g058720.2J;BolC08g058620.2J;BolC09g068630.2J	K12309+K12309+K01205+K12309+K12309+K12373+K12309+K12309+K12309+K12373+K12309+K12309+K12373+K12309	Down
Phosphatidylinositol signaling system	ko04070	70	257	3261	19416	BolC01g008740.2J;BolC01g011490.2J;BolC01g027480.2J;BolC01g043450.2J;BolC01g048500.2J;BolC02g003190.2J;BolC02g011210.2J;BolC02g014060.2J;BolC02g014090.2J;BolC02g023990.2J;BolC02g037070.2J;BolC02g048430.2J;BolC02g061770.2J;BolC02g061910.2J;BolC03g003670.2J;BolC03g006140.2J;BolC03g008520.2J;BolC03g011110.2J;BolC03g024940.2J;BolC03g035180.2J;BolC03g036460.2J;BolC03g046260.2J;BolC03g051150.2J;BolC03g0…	K00901+K01092+K21797+K01110+K00921+K00901+K02183+K05857+K05857+K00999+K01092+K10047+K00901+K15422+K00901+K02183+K00913+K02183+K02183+K01092+K10047+K01110+K00913+K02183+K15422+K15422+K00901+K02183+K02183+K18649+K01092+K02183+K02183+K18081+K02183+K00921+K01092+K00889+K10047+K20279+K20279+K02183+K18081+K20279+K20279+K20279+K20279+K00901+K18081+K10572+K02183+K05857+K10572+K00921+K21797+K18081+K02183+…	Down
Spliceosome	ko03040	58	672	3261	19416	BolC01g004370.2J;BolC01g018660.2J;BolC01g034300.2J;BolC01g039180.2J;BolC01g050320.2J;BolC01g052800.2J;BolC01g053680.2J;BolC02g000950.2J;BolC02g007400.2J;BolC02g021550.2J;BolC02g052500.2J;BolC02g062400.2J;BolC03g003880.2J;BolC03g006610.2J;BolC03g008190.2J;BolC03g008200.2J;BolC03g008220.2J;BolC03g008240.2J;BolC03g008280.2J;BolC03g008310.2J;BolC03g008510.2J;BolC03g010450.2J;BolC03g017800.2J;BolC03g0…	K12900+K03283+K03283+K12819+K03283+K03283+K11087+K12827+K03283+K12811+K12885+K12833+K12859+K12818+K03283+K03283+K03283+K03283+K03283+K03283+K12811+K12885+K12834+K12820+K12833+K12867+K12831+K12829+K03283+K12897+K11099+K12823+K03283+K12842+K03283+K12831+K12896+K12741+K12625+K12860+K12842+K12626+K12835+K12900+K12900+K12621+K03283+K12893+K12831+K12867+K12881+K12837+K12811+K03283+K12812+K03283+K03283+…	Down
Pyrimidine metabolism	ko00240	28	169	3261	19416	BolC01g004210.2J;BolC01g009470.2J;BolC02g026220.2J;BolC02g040980.2J;BolC02g057760.2J;BolC03g009370.2J;BolC03g009400.2J;BolC03g021410.2J;BolC03g023300.2J;BolC03g082730.2J;BolC03g086410.2J;BolC04g012630.2J;BolC04g014100.2J;BolC04g046360.2J;BolC05g011710.2J;BolC05g054070.2J;BolC05g057930.2J;BolC06g030930.2J;BolC07g018770.2J;BolC07g034690.2J;BolC07g040330.2J;BolC07g050190.2J;BolC07g051040.2J;BolC09g0…	K13998+K01513+K01956+K00940+K13800+K14641+K14641+K01240+K24242+K01513+K00940+K01240+K01937+K00876+K01510+K01937+K00857+K01081+K00876+K10808+K13800+K01465+K00940+K13800+K00940+K00940+K14641+K10807	Down
alpha-Linolenic acid metabolism	ko00592	28	117	3261	19416	BolC01g002100.2J;BolC02g008940.2J;BolC02g029480.2J;BolC02g030450.2J;BolC02g033060.2J;BolC02g042710.2J;BolC02g055850.2J;BolC03g050590.2J;BolC05g018380.2J;BolC05g028280.2J;BolC05g060390.2J;BolC05g063610.2J;BolC05g063620.2J;BolC06g001260.2J;BolC06g027420.2J;BolC06g032110.2J;BolC06g036450.2J;BolC07g000780.2J;BolC07g001880.2J;BolC07g033580.2J;BolC07g045450.2J;BolC08g007140.2J;BolC08g009030.2J;BolC08g0…	K01723+K16818+K00454+K10529+K05894+K01723+K07513+K05894+K10526+K16818+K10529+K18858+K18858+K16818+K00454+K10529+K00454+K10526+K01047+K10525+K10528+K16818+K00224+K10525+K00454+K10526+K00454+K10525	Down
Glutathione metabolism	ko00480	61	247	3261	19416	BolC01g000670.2J;BolC01g003060.2J;BolC01g007840.2J;BolC01g008210.2J;BolC01g052680.2J;BolC02g007930.2J;BolC02g018170.2J;BolC02g022050.2J;BolC03g018460.2J;BolC03g018470.2J;BolC03g026330.2J;BolC03g028370.2J;BolC03g028600.2J;BolC03g031150.2J;BolC03g063730.2J;BolC04g006220.2J;BolC04g017810.2J;BolC04g020580.2J;BolC04g020720.2J;BolC04g022850.2J;BolC04g029830.2J;BolC04g046770.2J;BolC04g056010.2J;BolC04g0…	K18592+K00434+K22596+K01255+K00434+K00799+K00434+K00031+K00799+K00799+K00432+K00799+K00799+K00434+K00799+K01255+K00432+K00799+K00799+K00799+K01256+K00799+K00799+K00799+K01256+K01255+K00799+K00799+K00799+K21888+K00799+K00033+K00799+K22596+K00434+K00036+K00799+K00799+K00799+K00799+K00434+K00799+K00797+K10808+K21456+K00432+K00434+K00434+K00036+K21888+K00383+K00799+K01255+K00799+K00799+K00434+K00036+…	Down
Ascorbate and aldarate metabolism	ko00053	50	389	3261	19416	BolC01g002580.2J;BolC01g003060.2J;BolC01g004630.2J;BolC01g021740.2J;BolC01g052680.2J;BolC02g004820.2J;BolC02g006980.2J;BolC02g007990.2J;BolC02g011090.2J;BolC02g011100.2J;BolC02g011110.2J;BolC02g018170.2J;BolC02g033580.2J;BolC02g048430.2J;BolC03g001470.2J;BolC03g031150.2J;BolC03g035710.2J;BolC03g036460.2J;BolC03g044560.2J;BolC03g053320.2J;BolC03g061260.2J;BolC03g067610.2J;BolC03g072440.2J;BolC03g0…	K00128+K00434+K00128+K14190+K00434+K00103+K00012+K12447+K00423+K00423+K00423+K00434+K12447+K10047+K08232+K00434+K16190+K10047+K12447+K00423+K00128+K00225+K18649+K00128+K00128+K00012+K21888+K00012+K10047+K00434+K00012+K08232+K00434+K08232+K10046+K00434+K00434+K00128+K14190+K16190+K21888+K08232+K12447+K00434+K08232+K00434+K00423+K10047+K00012+K12447	Down
Sulfur metabolism	ko00920	37	90	3261	19416	BolC01g000920.2J;BolC01g026690.2J;BolC01g027020.2J;BolC01g052150.2J;BolC02g061910.2J;BolC03g014220.2J;BolC03g040300.2J;BolC03g048340.2J;BolC03g051190.2J;BolC03g053230.2J;BolC03g056840.2J;BolC03g056860.2J;BolC03g086700.2J;BolC04g005060.2J;BolC04g031550.2J;BolC04g032950.2J;BolC04g041070.2J;BolC04g066600.2J;BolC05g014030.2J;BolC05g017810.2J;BolC05g039450.2J;BolC05g053590.2J;BolC05g060700.2J;BolC05g0…	K00860+K01738+K13811+K00392+K15422+K00640+K00392+K13811+K00860+K00640+K15422+K15422+K00640+K01738+K13034+K01738+K17285+K01738+K01011+K13811+K13811+K00640+K01738+K00860+K01739+K01011+K01011+K00860+K00860+K17285+K01738+K13811+K13034+K01738+K15422+K00860+K00392	Down
Riboflavin metabolism	ko00740	18	53	3261	19416	BolC01g009470.2J;BolC01g014660.2J;BolC03g026790.2J;BolC03g056520.2J;BolC03g060860.2J;BolC03g064070.2J;BolC03g073280.2J;BolC03g082730.2J;BolC04g003660.2J;BolC05g055710.2J;BolC06g027480.2J;BolC07g000200.2J;BolC07g018090.2J;BolC08g025320.2J;BolC08g032500.2J;BolC09g021960.2J;BolC09g031930.2J;BolC09g068420.2J	K01513+K20884+K00794+K14652+K20884+K14394+K20884+K01513+K18453+K22912+K20860+K00793+K14379+K14379+K20884+K20884+K22912+K00953	Down
DNA replication	ko03030	27	598	3261	19416	BolC01g010740.2J;BolC02g011350.2J;BolC02g036760.2J;BolC02g036840.2J;BolC03g029240.2J;BolC04g008580.2J;BolC04g022970.2J;BolC04g059670.2J;BolC05g006140.2J;BolC05g006490.2J;BolC05g006910.2J;BolC05g008520.2J;BolC05g011950.2J;BolC05g020050.2J;BolC06g000930.2J;BolC06g029760.2J;BolC07g026860.2J;BolC07g039730.2J;BolC07g040230.2J;BolC08g057680.2J;BolC09g011310.2J;Brassica_oleracea_newGene_1661;Brassica_ol…	K07466+K10754+K07466+K10755+K02325+K10745+K02326+K07466+K02324+K02327+K07466+K07466+K10755+K10755+K02540+K10756+K02542+K10756+K04799+K04802+K02209+K07466+K07466+K07466+K07466+K07466+K07466	Down
Biosynthesis of various secondary metabolites - part 2	ko00998	1	2	3261	19416	BolC05g038560.2J	K21568	Down
Flavonoid biosynthesis	ko00941	21	147	3261	19416	BolC01g016390.2J;BolC01g025590.2J;BolC02g006000.2J;BolC02g061690.2J;BolC03g002460.2J;BolC03g006710.2J;BolC03g013600.2J;BolC03g024820.2J;BolC03g068600.2J;BolC03g080010.2J;BolC04g009300.2J;BolC04g056710.2J;BolC06g008550.2J;BolC06g021990.2J;BolC07g057420.2J;BolC08g035550.2J;BolC09g023150.2J;BolC09g059140.2J;BolC09g063480.2J;BolC09g064000.2J;BolC09g066690.2J	K05277+K13065+K00660+K05278+K05277+K00660+K13065+K09754+K00588+K00588+K01859+K00487+K01859+K01859+K00588+K00475+K13082+K00660+K05278+K05280+K01859	Down
Brassinosteroid biosynthesis	ko00905	6	28	3261	19416	BolC03g008020.2J;BolC04g062800.2J;BolC06g029530.2J;BolC06g044840.2J;BolC06g046400.2J;BolC09g057210.2J	K09591+K09591+K09591+K09587+K15639+K09591	Down
Protein processing in endoplasmic reticulum	ko04141	96	701	3261	19416	BolC01g017740.2J;BolC01g018470.2J;BolC01g018660.2J;BolC01g023160.2J;BolC01g025540.2J;BolC01g033780.2J;BolC01g034300.2J;BolC01g037500.2J;BolC01g044980.2J;BolC01g045930.2J;BolC01g049900.2J;BolC01g050320.2J;BolC01g052800.2J;BolC01g053240.2J;BolC02g002120.2J;BolC02g006060.2J;BolC02g007400.2J;BolC02g016660.2J;BolC02g049070.2J;BolC02g051560.2J;BolC02g054930.2J;BolC02g061030.2J;BolC03g005690.2J;BolC03g0…	K10956+K09487+K03283+K06689+K10956+K07953+K03283+K12669+K13989+K10956+K14007+K03283+K03283+K06689+K13993+K13250+K03283+K04079+K10661+K09487+K01230+K10661+K13993+K03283+K03283+K03283+K03283+K03283+K03283+K12668+K06689+K08653+K09490+K10956+K09584+K13993+K12275+K08852+K13993+K09584+K10088+K09584+K14004+K09517+K03094+K03283+K13249+K14016+K10956+K01456+K07953+K03283+K09503+K03283+K12668+K01230+K12275+…	Down
Alanine, aspartate and glutamate metabolism	ko00250	28	147	3261	19416	BolC01g007040.2J;BolC02g007550.2J;BolC02g009850.2J;BolC02g022220.2J;BolC02g026220.2J;BolC03g003400.2J;BolC03g004570.2J;BolC03g008920.2J;BolC03g045300.2J;BolC03g050770.2J;BolC03g055630.2J;BolC03g061780.2J;BolC04g034500.2J;BolC04g042400.2J;BolC04g043330.2J;BolC05g021660.2J;BolC06g042010.2J;BolC07g020180.2J;BolC08g012040.2J;BolC08g030530.2J;BolC08g041640.2J;BolC09g007350.2J;BolC09g011450.2J;BolC09g0…	K00811+K01915+K14454+K01915+K01956+K00261+K01953+K01580+K01915+K00830+K01953+K01953+K01939+K01915+K01915+K14272+K14272+K14272+K01915+K14272+K01939+K01953+K00830+K01580+K01915+K00278+K01940+K01940	Down
Basal transcription factors	ko03022	10	125	3261	19416	BolC02g040890.2J;BolC03g025210.2J;BolC03g032870.2J;BolC03g070830.2J;BolC04g003270.2J;BolC06g030790.2J;BolC06g044150.2J;BolC07g016030.2J;BolC07g051370.2J;BolC09g008540.2J	K03137+K03124+K03138+K03120+K03124+K03139+K10844+K03120+K03123+K03122	Down
Ribosome biogenesis in eukaryotes	ko03008	21	296	3261	19416	BolC02g058470.2J;BolC03g006550.2J;BolC03g026810.2J;BolC04g002350.2J;BolC04g005300.2J;BolC04g024370.2J;BolC04g062110.2J;BolC05g027430.2J;BolC05g057740.2J;BolC06g027950.2J;BolC06g028180.2J;BolC06g042270.2J;BolC07g040700.2J;BolC07g040930.2J;BolC07g044630.2J;BolC08g010540.2J;BolC08g028550.2J;BolC08g035580.2J;BolC09g006840.2J;BolC09g007030.2J;BolC09g054510.2J	K03097+K03264+K14574+K18532+K14574+K12619+K03538+K03097+K03097+K14558+K06943+K18532+K14570+K03097+K07179+K14548+K14525+K07179+K14544+K11883+K11883	Down
Propanoate metabolism	ko00640	17	126	3261	19416	BolC01g025400.2J;BolC02g003320.2J;BolC03g003890.2J;BolC03g008340.2J;BolC03g022670.2J;BolC03g044650.2J;BolC03g049170.2J;BolC03g056940.2J;BolC04g041750.2J;BolC05g007100.2J;BolC06g002320.2J;BolC07g000520.2J;BolC07g046830.2J;BolC08g009970.2J;BolC08g056170.2J;BolC08g056630.2J;BolC09g015620.2J	K00382+K01899+K01899+K02160+K01962+K00382+K05605+K01578+K05605+K05605+K00382+K01900+K00016+K11262+K01961+K05605+K01900	Down
Biosynthesis of unsaturated fatty acids	ko01040	12	46	3261	19416	BolC02g013070.2J;BolC02g023750.2J;BolC02g055850.2J;BolC03g004740.2J;BolC03g026600.2J;BolC04g005040.2J;BolC05g024550.2J;BolC06g038950.2J;BolC07g017840.2J;BolC08g039280.2J;BolC09g056920.2J;BolC09g062230.2J	K10703+K10251+K07513+K10703+K03921+K03921+K10251+K10251+K10251+K10258+K03921+K10703	Down
Linoleic acid metabolism	ko00591	7	96	3261	19416	BolC01g033690.2J;BolC02g029480.2J;BolC06g027420.2J;BolC06g036450.2J;BolC07g001880.2J;BolC08g026470.2J;BolC08g051420.2J	K15718+K00454+K00454+K00454+K01047+K00454+K00454	Down
Phosphonate and phosphinate metabolism	ko00440	6	34	3261	19416	BolC01g026400.2J;BolC02g051710.2J;BolC05g010960.2J;BolC05g010970.2J;BolC07g033320.2J;BolC08g058740.2J	K00968+K00993+K00993+K00993+K00993+K00968	Down
One carbon pool by folate	ko00670	18	57	3261	19416	BolC01g001230.2J;BolC01g004210.2J;BolC01g023770.2J;BolC01g036380.2J;BolC03g041770.2J;BolC03g073550.2J;BolC03g081120.2J;BolC04g005400.2J;BolC04g041220.2J;BolC05g054300.2J;BolC06g025320.2J;BolC06g030250.2J;BolC06g033950.2J;BolC06g042720.2J;BolC08g007850.2J;BolC08g023150.2J;BolC08g043230.2J;BolC08g055130.2J	K00600+K13998+K01433+K00605+K00288+K00600+K00600+K00297+K00600+K00288+K00297+K01934+K00600+K00600+K00600+K00605+K00297+K00605	Down
Base excision repair	ko03410	12	116	3261	19416	BolC03g006700.2J;BolC03g029240.2J;BolC04g018470.2J;BolC04g022970.2J;BolC05g006140.2J;BolC05g006490.2J;BolC05g020080.2J;BolC06g013970.2J;BolC07g040230.2J;BolC08g025800.2J;BolC08g057680.2J;BolC08g058480.2J	K10569+K02325+K24070+K02326+K02324+K02327+K03660+K10563+K04799+K01246+K04802+K10773	Down
Arachidonic acid metabolism	ko00590	12	77	3261	19416	BolC01g000670.2J;BolC03g026330.2J;BolC04g017810.2J;BolC04g053700.2J;BolC04g053720.2J;BolC04g053740.2J;BolC05g021070.2J;BolC07g001880.2J;BolC07g045980.2J;BolC07g056220.2J;BolC09g001760.2J;BolC09g001920.2J	K18592+K00432+K00432+K08726+K08726+K08726+K15730+K01047+K08726+K00432+K08726+K15730	Down
Stilbenoid, diarylheptanoid and gingerol biosynthesis	ko00945	7	72	3261	19416	BolC01g025590.2J;BolC03g013600.2J;BolC03g024820.2J;BolC03g068600.2J;BolC03g080010.2J;BolC04g056710.2J;BolC07g057420.2J	K13065+K13065+K09754+K00588+K00588+K00487+K00588	Down
Pyruvate metabolism	ko00620	56	298	3261	19416	BolC01g002580.2J;BolC01g004630.2J;BolC01g025400.2J;BolC01g029710.2J;BolC02g003780.2J;BolC02g004910.2J;BolC02g014320.2J;BolC02g021160.2J;BolC03g004110.2J;BolC03g005440.2J;BolC03g008340.2J;BolC03g018810.2J;BolC03g022670.2J;BolC03g042850.2J;BolC03g044650.2J;BolC03g057210.2J;BolC03g061260.2J;BolC03g070490.2J;BolC03g071210.2J;BolC03g074650.2J;BolC03g075060.2J;BolC03g085030.2J;BolC04g018390.2J;BolC04g0…	K00128+K00128+K00382+K00873+K00026+K00029+K00051+K00162+K00873+K00029+K02160+K01069+K01962+K00627+K00382+K00873+K00128+K01595+K00162+K00128+K00128+K01595+K01069+K00627+K00026+K01595+K01069+K01759+K01679+K01759+K00873+K01913+K00627+K00382+K00026+K00026+K01595+K01595+K18881+K00029+K01759+K00161+K00029+K00016+K00128+K00025+K11262+K00873+K01961+K00161+K00028+K00028+K00162+K00873+K01759+K01595	Down
Butanoate metabolism	ko00650	12	71	3261	19416	BolC02g011080.2J;BolC02g040420.2J;BolC03g008920.2J;BolC03g029420.2J;BolC04g058040.2J;BolC05g015230.2J;BolC05g049410.2J;BolC07g011690.2J;BolC08g032750.2J;BolC09g031620.2J;BolC09g051320.2J;BolC09g055950.2J	K00109+K01641+K01580+K01640+K01653+K18121+K01913+K18121+K01652+K01641+K00109+K01580	Down
2-Oxocarboxylic acid metabolism	ko01210	48	293	3261	19416	BolC01g000040.2J;BolC01g001450.2J;BolC01g003640.2J;BolC01g007040.2J;BolC02g006120.2J;BolC02g009850.2J;BolC02g017330.2J;BolC02g022050.2J;BolC02g030760.2J;BolC02g035950.2J;BolC02g035990.2J;BolC02g059950.2J;BolC03g006860.2J;BolC03g026160.2J;BolC03g046400.2J;BolC03g050490.2J;BolC03g073270.2J;BolC04g004590.2J;BolC04g034520.2J;BolC04g041440.2J;BolC04g058040.2J;BolC04g062380.2J;BolC05g007900.2J;BolC05g0…	K14677+K14682+K00030+K00811+K21360+K14454+K00928+K00031+K11821+K00818+K00052+K15741+K00928+K01704+K21346+K01681+K11812+K21359+K00930+K12156+K01653+K00620+K00826+K14272+K11820+K21346+K00053+K00053+K00053+K01647+K11821+K14272+K11821+K11819+K11819+K01687+K14272+K15741+K01438+K14682+K11812+K01703+K00133+K00133+K14272+K01652+K00826+K00145	Down
Plant-pathogen interaction	ko04626	229	1497	3261	19416	BolC01g005320.2J;BolC01g007240.2J;BolC01g007580.2J;BolC01g013850.2J;BolC01g015300.2J;BolC01g015520.2J;BolC01g017950.2J;BolC01g018040.2J;BolC01g018470.2J;BolC01g027110.2J;BolC01g028360.2J;BolC01g030440.2J;BolC01g030450.2J;BolC01g039760.2J;BolC01g042390.2J;BolC01g048120.2J;BolC01g052390.2J;BolC01g053200.2J;BolC02g000180.2J;BolC02g005350.2J;BolC02g008670.2J;BolC02g008680.2J;BolC02g008800.2J;BolC02g0…	K13457+K18834+K13425+K02358+K13412+K13430+K13416+K16225+K09487+K13466+K13448+K18875+K18875+K13448+K13412+K13420+K13448+K13430+K18834+K13466+K16226+K16226+K13420+K16226+K16226+K02183+K16224+K16224+K16224+K04079+K05391+K13425+K13436+K16224+K18835+K13436+K13425+K16225+K15397+K16226+K16226+K13436+K16225+K09487+K13447+K13457+K13436+K13430+K13457+K20600+K15397+K13412+K13430+K02183+K02183+K16224+K16224+…	Down
Mismatch repair	ko03430	23	513	3261	19416	BolC01g010740.2J;BolC02g011350.2J;BolC02g023770.2J;BolC02g036760.2J;BolC02g036840.2J;BolC03g034600.2J;BolC03g045590.2J;BolC04g059670.2J;BolC05g006490.2J;BolC05g006910.2J;BolC05g008520.2J;BolC05g011950.2J;BolC05g020050.2J;BolC06g029760.2J;BolC07g039730.2J;BolC08g026890.2J;BolC08g057680.2J;Brassica_oleracea_newGene_1661;Brassica_oleracea_newGene_2678;Brassica_oleracea_newGene_2714;Brassica_oleracea…	K07466+K10754+K07456+K07466+K10755+K08737+K08735+K07466+K02327+K07466+K07466+K10755+K10755+K10756+K10756+K10746+K04802+K07466+K07466+K07466+K07466+K07466+K07466	Down
Selenocompound metabolism	ko00450	20	65	3261	19416	BolC01g027020.2J;BolC02g008490.2J;BolC02g021500.2J;BolC02g025710.2J;BolC03g009250.2J;BolC03g025240.2J;BolC03g036730.2J;BolC03g048340.2J;BolC03g052980.2J;BolC04g003330.2J;BolC05g006380.2J;BolC05g017810.2J;BolC05g039450.2J;BolC05g062440.2J;BolC08g028360.2J;BolC08g039370.2J;BolC08g040970.2J;BolC09g012480.2J;BolC09g016360.2J;BolC09g055230.2J	K13811+K00549+K08247+K00549+K00549+K00384+K00549+K13811+K00384+K00384+K11717+K13811+K13811+K01739+K13811+K01874+K01760+K00384+K01761+K00549	Down
Glycosylphosphatidylinositol (GPI)-anchor biosynthesis	ko00563	12	70	3261	19416	BolC01g052460.2J;BolC02g006610.2J;BolC03g007280.2J;BolC03g007340.2J;BolC03g027440.2J;BolC03g051340.2J;BolC05g021020.2J;BolC05g058530.2J;BolC06g046960.2J;BolC07g029440.2J;Brassica_oleracea_newGene_302;Brassica_oleracea_newGene_9287	K03860+K05286+K03860+K03860+K05283+K03860+K03860+K05291+K03860+K07541+K05283+K03860	Down
Ubiquinone and other terpenoid-quinone biosynthesis	ko00130	20	114	3261	19416	BolC01g006290.2J;BolC01g035970.2J;BolC02g017680.2J;BolC02g036570.2J;BolC02g061380.2J;BolC03g015620.2J;BolC03g029610.2J;BolC03g031680.2J;BolC04g021170.2J;BolC04g056710.2J;BolC04g064970.2J;BolC05g041630.2J;BolC06g012960.2J;BolC06g027400.2J;BolC06g031350.2J;BolC06g036850.2J;BolC07g056590.2J;BolC09g014820.2J;Brassica_oleracea_newGene_3830;Brassica_oleracea_newGene_488	K09834+K23094+K03809+K05928+K01904+K03809+K00815+K14759+K19222+K00487+K23095+K01904+K01904+K12502+K02552+K01904+K09834+K01904+K12501+K12501	Down
beta-Alanine metabolism	ko00410	17	167	3261	19416	BolC01g002580.2J;BolC01g004630.2J;BolC02g063530.2J;BolC03g006580.2J;BolC03g008920.2J;BolC03g025860.2J;BolC03g049170.2J;BolC03g056940.2J;BolC03g061260.2J;BolC03g074650.2J;BolC03g075060.2J;BolC04g041750.2J;BolC05g007100.2J;BolC07g058560.2J;BolC07g058670.2J;BolC08g056630.2J;BolC09g055950.2J	K00128+K00128+K00276+K13366+K01580+K00276+K05605+K01578+K00128+K00128+K00128+K05605+K05605+K00276+K00128+K05605+K01580	Down
Betalain biosynthesis	ko00965	8	56	3261	19416	BolC01g019070.2J;BolC03g055130.2J;BolC06g016360.2J;BolC06g016370.2J;BolC07g000610.2J;BolC08g017440.2J;BolC09g023090.2J;BolC09g023120.2J	K15777+K15777+K15777+K15777+K01593+K15777+K15777+K15777	Down
Vitamin B6 metabolism	ko00750	14	27	3261	19416	BolC02g000370.2J;BolC02g029850.2J;BolC03g000470.2J;BolC03g030320.2J;BolC03g075090.2J;BolC03g082590.2J;BolC04g043660.2J;BolC04g062910.2J;BolC05g015270.2J;BolC08g002460.2J;BolC08g026650.2J;BolC09g013710.2J;BolC09g040510.2J;BolC09g049770.2J	K06215+K13248+K06215+K23998+K00831+K01733+K00868+K06215+K13248+K05275+K13248+K01733+K05275+K08681	Down
Glycolysis / Gluconeogenesis	ko00010	98	342	3261	19416	BolC01g000260.2J;BolC01g002020.2J;BolC01g002580.2J;BolC01g004630.2J;BolC01g009960.2J;BolC01g009980.2J;BolC01g015470.2J;BolC01g019030.2J;BolC01g019040.2J;BolC01g020340.2J;BolC01g021210.2J;BolC01g025400.2J;BolC01g028250.2J;BolC01g029710.2J;BolC01g044890.2J;BolC01g050130.2J;BolC01g055690.2J;BolC02g015360.2J;BolC02g021160.2J;BolC02g032760.2J;BolC02g035330.2J;BolC02g058910.2J;BolC03g004110.2J;BolC03g0…	K01623+K01792+K00128+K00128+K00850+K00850+K00121+K01810+K01810+K01792+K01623+K00382+K15634+K00873+K01785+K00927+K00134+K01792+K00162+K15634+K00927+K00001+K00873+K01792+K01689+K00002+K01792+K00927+K00627+K00382+K00873+K00128+K00162+K01623+K00128+K00128+K00002+K01803+K03841+K01623+K00627+K01792+K01803+K01623+K00131+K00850+K01689+K00895+K00134+K00895+K00121+K01835+K01810+K00873+K01792+K00844+K01913+…	Down
Monobactam biosynthesis	ko00261	11	35	3261	19416	BolC01g013420.2J;BolC01g027020.2J;BolC02g017330.2J;BolC03g006860.2J;BolC03g048340.2J;BolC04g067430.2J;BolC05g017810.2J;BolC05g039450.2J;BolC08g025370.2J;BolC08g025390.2J;BolC08g028360.2J	K12524+K13811+K00928+K00928+K13811+K01714+K13811+K13811+K00133+K00133+K13811	Down
Oxidative phosphorylation	ko00190	141	573	3261	19416	BolC01g000240.2J;BolC01g004690.2J;BolC01g006610.2J;BolC01g006640.2J;BolC01g006890.2J;BolC01g008900.2J;BolC01g009700.2J;BolC01g017930.2J;BolC01g019440.2J;BolC01g020850.2J;BolC01g023250.2J;BolC01g038980.2J;BolC01g038990.2J;BolC01g041560.2J;BolC01g044450.2J;BolC01g045820.2J;BolC01g047190.2J;BolC01g047200.2J;BolC01g050590.2J;BolC01g056510.2J;BolC01g057590.2J;BolC02g005650.2J;BolC02g005660.2J;BolC02g0…	K02155+K02144+K03661+K00417+K02109+K01535+K02140+K02152+K03955+K02140+K02267+K02112+K02112+K02135+K03966+K02155+K02265+K02265+K03950+K03939+K02152+K00411+K02137+K03952+K03955+K02265+K02151+K02150+K02112+K02134+K02133+K01507+K01507+K03940+K02137+K03952+K03949+K02136+K03955+K02154+K03884+K02113+K02115+K02151+K03943+K02152+K03955+K03950+K03966+K02155+K02133+K02155+K02154+K02266+K02155+K03965+K03661+…	Down
Limonene and pinene degradation	ko00903	6	19	3261	19416	BolC01g002580.2J;BolC01g004630.2J;BolC03g061260.2J;BolC03g074650.2J;BolC03g075060.2J;BolC07g058670.2J	K00128+K00128+K00128+K00128+K00128+K00128	Down
Tyrosine metabolism	ko00350	18	116	3261	19416	BolC01g007040.2J;BolC01g010540.2J;BolC01g015470.2J;BolC02g009850.2J;BolC02g028580.2J;BolC02g058910.2J;BolC02g063530.2J;BolC03g000330.2J;BolC03g025860.2J;BolC03g029610.2J;BolC04g049410.2J;BolC05g020750.2J;BolC06g043360.2J;BolC07g000610.2J;BolC07g058560.2J;BolC08g049000.2J;BolC09g024020.2J;BolC09g045740.2J	K00811+K01592+K00121+K14454+K00817+K00001+K00276+K07253+K00276+K00815+K15849+K00121+K00817+K01593+K00276+K00001+K00121+K07253	Down
Photosynthesis - antenna proteins	ko00196	35	45	3261	19416	BolC01g037020.2J;BolC02g000320.2J;BolC02g017970.2J;BolC02g041240.2J;BolC02g053590.2J;BolC03g020300.2J;BolC03g025920.2J;BolC03g031810.2J;BolC03g050340.2J;BolC03g067020.2J;BolC03g071060.2J;BolC04g007730.2J;BolC04g014670.2J;BolC04g014680.2J;BolC04g025480.2J;BolC04g027230.2J;BolC04g031280.2J;BolC04g060000.2J;BolC05g013480.2J;BolC05g027400.2J;BolC06g026270.2J;BolC07g015680.2J;BolC07g015690.2J;BolC07g0…	K08909+K08915+K08914+K08916+K08913+K08912+K08917+K08916+K08913+K08910+K08912+K08915+K08912+K08912+K08912+K08909+K08908+K08912+K08917+K08912+K08908+K08912+K08912+K08913+K08911+K08917+K08908+K08907+K08917+K08913+K08909+K08916+K08914+K08917+K08908	Down
Glycerolipid metabolism	ko00561	64	284	3261	19416	BolC01g002580.2J;BolC01g004630.2J;BolC01g007260.2J;BolC01g008740.2J;BolC01g010410.2J;BolC01g052740.2J;BolC02g003190.2J;BolC02g008760.2J;BolC02g017320.2J;BolC02g031360.2J;BolC02g036130.2J;BolC02g046240.2J;BolC02g061770.2J;BolC03g000540.2J;BolC03g003670.2J;BolC03g003950.2J;BolC03g003960.2J;BolC03g015330.2J;BolC03g022350.2J;BolC03g034690.2J;BolC03g057150.2J;BolC03g061260.2J;BolC03g070820.2J;BolC03g0…	K00128+K00128+K03715+K00901+K00679+K15728+K00901+K00679+K00679+K13513+K15918+K00679+K00901+K06119+K00901+K07407+K07407+K00679+K00002+K13508+K00901+K00128+K00679+K00128+K00128+K00679+K00679+K00002+K00655+K00679+K00679+K13523+K00679+K00655+K00630+K00679+K00679+K21362+K23737+K18693+K00679+K07407+K13523+K15918+K21362+K01054+K01054+K00901+K00679+K18693+K24189+K00128+K00630+K01054+K00655+K01054+K00002+…	Down
Proteasome	ko03050	45	300	3261	19416	BolC01g007830.2J;BolC01g033880.2J;BolC01g040590.2J;BolC02g023260.2J;BolC02g035100.2J;BolC02g059720.2J;BolC03g050660.2J;BolC03g051220.2J;BolC03g081760.2J;BolC03g085340.2J;BolC04g053860.2J;BolC04g058770.2J;BolC05g009940.2J;BolC05g026700.2J;BolC06g008730.2J;BolC06g015060.2J;BolC06g015070.2J;BolC06g015150.2J;BolC06g016300.2J;BolC06g016580.2J;BolC06g028650.2J;BolC06g034370.2J;BolC06g036650.2J;BolC06g0…	K02738+K02736+K02728+K11599+K02726+K03030+K02730+K02737+K02738+K02729+K02727+K03032+K02737+K03036+K03061+K03061+K03061+K02729+K02728+K02734+K02726+K06699+K11599+K11599+K06699+K02726+K02730+K03033+K02739+K02731+K02738+K03029+K02734+K03028+K02737+K02731+K02732+K02737+K03038+K06699+K02736+K02725+K03038+K10881+K10881	Down
Valine, leucine and isoleucine degradation	ko00280	26	135	3261	19416	BolC01g002580.2J;BolC01g004630.2J;BolC01g025400.2J;BolC01g046660.2J;BolC02g040420.2J;BolC02g055850.2J;BolC02g062080.2J;BolC03g029420.2J;BolC03g031120.2J;BolC03g044650.2J;BolC03g049170.2J;BolC03g061260.2J;BolC03g074650.2J;BolC03g075060.2J;BolC04g041750.2J;BolC05g007100.2J;BolC05g007900.2J;BolC05g039630.2J;BolC05g050100.2J;BolC06g002320.2J;BolC07g055820.2J;BolC07g058670.2J;BolC08g033700.2J;BolC08g0…	K00128+K00128+K00382+K18660+K01641+K07513+K00020+K01640+K00020+K00382+K05605+K00128+K00128+K00128+K05605+K05605+K00826+K01968+K18660+K00382+K01968+K00128+K00826+K01968+K05605+K01641	Down
Carotenoid biosynthesis	ko00906	38	91	3261	19416	BolC01g012860.2J;BolC01g020140.2J;BolC01g025670.2J;BolC02g007940.2J;BolC02g020040.2J;BolC02g045780.2J;BolC02g052670.2J;BolC03g013980.2J;BolC03g034670.2J;BolC03g071840.2J;BolC03g079950.2J;BolC03g084630.2J;BolC04g040870.2J;BolC04g055620.2J;BolC04g060900.2J;BolC05g006420.2J;BolC05g052010.2J;BolC05g056380.2J;BolC05g060760.2J;BolC06g007060.2J;BolC06g007260.2J;BolC06g013910.2J;BolC06g020450.2J;BolC06g0…	K09840+K15746+K09835+K02291+K15746+K09843+K09841+K06444+K17911+K02293+K14595+K09841+K02293+K09843+K09838+K09839+K09840+K06443+K00514+K09841+K15748+K15748+K09837+K09840+K09843+K14595+K15747+K15747+K09838+K09835+K17911+K09838+K17911+K17911+K09835+K09843+K06444+K02291	Down
RNA transport	ko03013	52	786	3261	19416	BolC01g021730.2J;BolC01g022010.2J;BolC01g048820.2J;BolC01g055270.2J;BolC02g012650.2J;BolC02g012660.2J;BolC02g023490.2J;BolC02g031200.2J;BolC02g036410.2J;BolC03g009460.2J;BolC03g011880.2J;BolC03g015380.2J;BolC03g051500.2J;BolC03g079970.2J;BolC04g016840.2J;BolC04g020000.2J;BolC04g028300.2J;BolC04g030760.2J;BolC04g050650.2J;BolC04g052290.2J;BolC04g062110.2J;BolC04g062280.2J;BolC05g001650.2J;BolC05g0…	K12160+K03113+K03257+K14289+K03231+K03231+K14308+K00784+K03239+K05749+K03231+K03113+K13126+K13126+K18213+K14004+K14307+K10577+K13126+K03253+K03538+K14292+K09291+K13137+K03239+K14004+K14292+K14319+K03239+K03257+K14292+K10577+K03245+K14318+K14319+K12160+K14294+K03257+K14525+K13126+K10577+K14319+K13126+K03243+K03243+K03231+K14318+K12881+K03231+K12812+K03237+K13126	Down
Lysine degradation	ko00310	12	103	3261	19416	BolC01g002580.2J;BolC01g004630.2J;BolC01g025400.2J;BolC03g044650.2J;BolC03g061260.2J;BolC03g074650.2J;BolC03g075060.2J;BolC04g050700.2J;BolC04g050970.2J;BolC06g002320.2J;BolC06g048160.2J;BolC07g058670.2J	K00128+K00128+K00382+K00382+K00128+K00128+K00128+K11430+K11420+K00382+K11423+K00128	Down
Fatty acid degradation	ko00071	21	107	3261	19416	BolC01g002580.2J;BolC01g004630.2J;BolC01g015470.2J;BolC02g055850.2J;BolC02g058910.2J;BolC03g027480.2J;BolC03g027500.2J;BolC03g028210.2J;BolC03g061260.2J;BolC03g074650.2J;BolC03g075060.2J;BolC04g040560.2J;BolC04g040990.2J;BolC04g068410.2J;BolC05g020750.2J;BolC05g033660.2J;BolC06g029710.2J;BolC07g058670.2J;BolC08g049000.2J;BolC09g016220.2J;BolC09g024020.2J	K00128+K00128+K00121+K07513+K00001+K20495+K20495+K01897+K00128+K00128+K00128+K18880+K01897+K01897+K00121+K01897+K01897+K00128+K00001+K01897+K00121	Down
Zeatin biosynthesis	ko00908	13	92	3261	19416	BolC02g010260.2J;BolC02g015730.2J;BolC03g010500.2J;BolC03g012490.2J;BolC04g011870.2J;BolC04g012120.2J;BolC04g012240.2J;BolC04g061860.2J;BolC06g022250.2J;BolC08g039710.2J;BolC08g046160.2J;BolC09g006980.2J;BolC09g058370.2J	K00791+K00279+K00791+K13493+K13496+K13496+K13496+K13496+K13493+K13493+K00279+K13496+K13496	Down
Valine, leucine and isoleucine biosynthesis	ko00290	13	61	3261	19416	BolC02g006120.2J;BolC02g035990.2J;BolC03g026160.2J;BolC04g004590.2J;BolC04g058040.2J;BolC05g007900.2J;BolC06g008260.2J;BolC06g015100.2J;BolC06g024480.2J;BolC07g012420.2J;BolC08g008400.2J;BolC08g032750.2J;BolC08g033700.2J	K21360+K00052+K01704+K21359+K01653+K00826+K00053+K00053+K00053+K01687+K01703+K01652+K00826	Down
Taurine and hypotaurine metabolism	ko00430	3	37	3261	19416	BolC01g000670.2J;BolC03g008920.2J;BolC09g055950.2J	K18592+K01580+K01580	Down
Phenylpropanoid biosynthesis	ko00940	102	734	3261	19416	BolC01g001190.2J;BolC01g002610.2J;BolC01g014030.2J;BolC01g014070.2J;BolC01g015310.2J;BolC01g025110.2J;BolC01g025590.2J;BolC01g029800.2J;BolC01g041020.2J;BolC01g044800.2J;BolC01g050670.2J;BolC01g051810.2J;BolC02g006520.2J;BolC02g010990.2J;BolC02g012340.2J;BolC02g020550.2J;BolC02g033640.2J;BolC02g033760.2J;BolC02g035790.2J;BolC02g050270.2J;BolC02g053890.2J;BolC02g061380.2J;BolC03g002080.2J;BolC03g0…	K00083+K09755+K22395+K22395+K00430+K00430+K13065+K00430+K13068+K05350+K01188+K00430+K09753+K05349+K00430+K00430+K18368+K13066+K09753+K09753+K00430+K01904+K05349+K01188+K01188+K01188+K13065+K13066+K09753+K09754+K01188+K23260+K12355+K00588+K00083+K00083+K00588+K00430+K09753+K10775+K22395+K01188+K01188+K01188+K00487+K01188+K22395+K10775+K18368+K01188+K00430+K00430+K09753+K05350+K01188+K13068+K01904+…	Down
Synthesis and degradation of ketone bodies	ko00072	3	11	3261	19416	BolC02g040420.2J;BolC03g029420.2J;BolC09g031620.2J	K01641+K01640+K01641	Down
Arginine and proline metabolism	ko00330	33	204	3261	19416	BolC01g002580.2J;BolC01g004090.2J;BolC01g004630.2J;BolC01g007040.2J;BolC01g056980.2J;BolC02g009210.2J;BolC02g009850.2J;BolC02g048330.2J;BolC02g054690.2J;BolC03g003800.2J;BolC03g006580.2J;BolC03g036210.2J;BolC03g045240.2J;BolC03g051080.2J;BolC03g053310.2J;BolC03g061260.2J;BolC03g072390.2J;BolC03g074650.2J;BolC03g075060.2J;BolC03g079450.2J;BolC03g080190.2J;BolC04g047950.2J;BolC05g048250.2J;BolC05g0…	K00128+K01583+K00128+K00811+K01611+K00472+K14454+K01426+K14329+K10536+K13366+K01611+K00472+K01259+K00472+K00128+K14329+K00128+K00128+K01583+K00472+K14329+K00472+K01611+K00472+K00797+K01583+K00128+K00472+K01426+K00472+K01611+K00286	Down
Endocytosis	ko04144	94	615	3261	19416	BolC01g003520.2J;BolC01g011320.2J;BolC01g018660.2J;BolC01g021940.2J;BolC01g026060.2J;BolC01g034300.2J;BolC01g047090.2J;BolC01g050320.2J;BolC01g052800.2J;BolC01g053320.2J;BolC01g053430.2J;BolC01g054950.2J;BolC02g007400.2J;BolC02g017930.2J;BolC02g027250.2J;BolC02g029870.2J;BolC02g036690.2J;BolC02g046900.2J;BolC02g048560.2J;BolC02g049470.2J;BolC02g058380.2J;BolC03g008190.2J;BolC03g008200.2J;BolC03g0…	K18442+K12493+K03283+K12188+K19366+K03283+K01115+K03283+K03283+K04646+K12486+K10364+K03283+K12486+K07937+K12197+K01115+K11826+K12486+K12486+K12472+K03283+K03283+K03283+K03283+K03283+K03283+K12492+K12196+K07897+K01115+K12198+K12191+K05754+K18467+K07904+K18467+K19476+K07897+K07937+K12492+K05757+K12196+K07937+K03283+K12492+K07901+K04645+K01115+K12489+K10396+K03283+K07897+K07937+K03283+K07904+K12486+…	Down
Tropane, piperidine and pyridine alkaloid biosynthesis	ko00960	20	116	3261	19416	BolC01g007040.2J;BolC02g002490.2J;BolC02g009850.2J;BolC02g028580.2J;BolC02g063530.2J;BolC03g025860.2J;BolC03g028620.2J;BolC03g028640.2J;BolC03g029610.2J;BolC04g020890.2J;BolC04g020900.2J;BolC04g020940.2J;BolC04g020970.2J;BolC04g049410.2J;BolC04g055740.2J;BolC06g043360.2J;BolC07g058560.2J;BolC08g002820.2J;BolC08g002850.2J;BolC08g002860.2J	K00811+K08081+K14454+K00817+K00276+K00276+K08081+K08081+K00815+K08081+K08081+K08081+K08081+K15849+K08081+K00817+K00276+K08081+K08081+K08081	Down
Nucleotide excision repair	ko03420	25	561	3261	19416	BolC01g010740.2J;BolC02g011350.2J;BolC02g036760.2J;BolC02g036840.2J;BolC03g029240.2J;BolC03g049350.2J;BolC04g022970.2J;BolC04g059670.2J;BolC05g006140.2J;BolC05g006490.2J;BolC05g006910.2J;BolC05g008520.2J;BolC05g011950.2J;BolC05g020050.2J;BolC06g029760.2J;BolC06g044150.2J;BolC07g039730.2J;BolC08g052090.2J;BolC08g057680.2J;Brassica_oleracea_newGene_1661;Brassica_oleracea_newGene_2678;Brassica_olera…	K07466+K10754+K07466+K10755+K02325+K10610+K02326+K07466+K02324+K02327+K07466+K07466+K10755+K10755+K10756+K10844+K10756+K10839+K04802+K07466+K07466+K07466+K07466+K07466+K07466	Down
Anthocyanin biosynthesis	ko00942	4	21	3261	19416	BolC03g015820.2J;BolC03g015840.2J;BolC03g015860.2J;BolC08g012750.2J	K17193+K17193+K17193+K12338	Down
Purine metabolism	ko00230	75	315	3261	19416	BolC01g000920.2J;BolC01g009470.2J;BolC01g022630.2J;BolC01g024060.2J;BolC01g027020.2J;BolC01g029710.2J;BolC01g052580.2J;BolC02g004590.2J;BolC02g014380.2J;BolC02g023590.2J;BolC02g037650.2J;BolC02g040980.2J;BolC03g001300.2J;BolC03g004110.2J;BolC03g009370.2J;BolC03g009400.2J;BolC03g022040.2J;BolC03g022300.2J;BolC03g023300.2J;BolC03g035590.2J;BolC03g044970.2J;BolC03g047190.2J;BolC03g048340.2J;BolC03g0…	K00860+K01513+K00856+K14977+K13811+K00873+K00856+K00759+K13484+K01427+K00951+K00940+K00856+K00873+K14641+K14641+K00939+K11808+K24242+K00939+K00951+K01923+K13811+K00860+K00873+K00759+K01513+K00940+K18532+K18453+K01939+K00942+K01510+K13811+K01835+K00759+K00873+K13811+K00860+K00759+K01923+K00759+K01081+K18532+K00759+K00365+K10808+K00939+K14977+K00759+K00940+K00856+K00860+K00860+K00939+K13811+K01835+…	Down
Flavone and flavonol biosynthesis	ko00944	2	6	3261	19416	BolC02g007850.2J;BolC09g064000.2J	K10757+K05280	Down
Ether lipid metabolism	ko00565	12	78	3261	19416	BolC01g030270.2J;BolC01g047090.2J;BolC02g036690.2J;BolC02g051710.2J;BolC03g004470.2J;BolC03g032400.2J;BolC04g053830.2J;BolC05g000180.2J;BolC05g010960.2J;BolC05g010970.2J;BolC07g001880.2J;BolC07g033320.2J	K01114+K01115+K01115+K00993+K06123+K01115+K01114+K01115+K00993+K00993+K01047+K00993	Down
Citrate cycle (TCA cycle)	ko00020	33	250	3261	19416	BolC01g003640.2J;BolC01g025400.2J;BolC02g003320.2J;BolC02g003780.2J;BolC02g021160.2J;BolC02g022050.2J;BolC02g056270.2J;BolC02g056280.2J;BolC03g003890.2J;BolC03g042850.2J;BolC03g044650.2J;BolC03g050490.2J;BolC03g071210.2J;BolC04g040180.2J;BolC04g050210.2J;BolC04g068570.2J;BolC05g052680.2J;BolC06g002320.2J;BolC06g008240.2J;BolC06g014540.2J;BolC06g024620.2J;BolC06g041530.2J;BolC07g000520.2J;BolC08g0…	K00030+K00382+K01899+K00026+K00162+K00031+K01648+K01648+K01899+K00627+K00382+K01681+K00162+K00627+K00026+K01679+K00627+K00382+K00026+K00026+K01647+K00161+K01900+K00025+K00161+K01648+K01900+K01648+K00164+K00162+K00236+K00234+K00234	Down
Galactose metabolism	ko00052	42	419	3261	19416	BolC01g009960.2J;BolC01g009980.2J;BolC01g020740.2J;BolC01g032390.2J;BolC01g044890.2J;BolC02g007990.2J;BolC02g033580.2J;BolC03g003950.2J;BolC03g003960.2J;BolC03g005470.2J;BolC03g008880.2J;BolC03g008900.2J;BolC03g044560.2J;BolC03g068560.2J;BolC04g001200.2J;BolC04g021840.2J;BolC04g058820.2J;BolC04g061680.2J;BolC05g021540.2J;BolC05g044020.2J;BolC05g052790.2J;BolC05g056520.2J;BolC05g063380.2J;BolC06g0…	K00850+K00850+K12309+K12309+K01785+K12447+K12447+K07407+K07407+K01187+K00963+K00963+K12447+K12309+K18819+K12309+K12309+K00850+K01835+K00844+K12309+K00850+K00963+K12309+K00844+K01193+K07407+K00850+K12309+K12309+K01193+K01835+K00850+K12447+K00850+K01193+K00844+K01784+K18819+K01835+K12309+K12447	Down
Cysteine and methionine metabolism	ko00270	79	354	3261	19416	BolC01g004680.2J;BolC01g007040.2J;BolC01g012760.2J;BolC01g013420.2J;BolC01g017630.2J;BolC01g026690.2J;BolC01g038340.2J;BolC01g056980.2J;BolC02g003780.2J;BolC02g008490.2J;BolC02g009850.2J;BolC02g017330.2J;BolC02g025710.2J;BolC02g033590.2J;BolC02g043900.2J;BolC03g006860.2J;BolC03g009250.2J;BolC03g010420.2J;BolC03g014220.2J;BolC03g021720.2J;BolC03g029610.2J;BolC03g030760.2J;BolC03g036210.2J;BolC03g0…	K00058+K00811+K00558+K12524+K21623+K01738+K01251+K01611+K00026+K00549+K14454+K00928+K00549+K05933+K08967+K00928+K00549+K00558+K00640+K00789+K00815+K01762+K01611+K00549+K00789+K00058+K01251+K00640+K00558+K01244+K00831+K21623+K21623+K00640+K00789+K01738+K00789+K05933+K13034+K01738+K01251+K08963+K00026+K00789+K01738+K00826+K01011+K00640+K01738+K01739+K01611+K00026+K00026+K01011+K23977+K01011+K00797+…	Down
Glycosphingolipid biosynthesis - ganglio series	ko00604	13	70	3261	19416	BolC01g020740.2J;BolC01g032390.2J;BolC03g068560.2J;BolC04g021840.2J;BolC04g036820.2J;BolC04g058820.2J;BolC05g052790.2J;BolC06g001090.2J;BolC06g037000.2J;BolC06g039330.2J;BolC07g058720.2J;BolC08g058620.2J;BolC09g068630.2J	K12309+K12309+K12309+K12309+K12373+K12309+K12309+K12309+K12373+K12309+K12309+K12373+K12309	Down
ABC transporters	ko02010	32	208	3261	19416	BolC01g019750.2J;BolC01g020450.2J;BolC01g025310.2J;BolC02g002650.2J;BolC02g028680.2J;BolC02g051750.2J;BolC02g053960.2J;BolC03g021750.2J;BolC04g011100.2J;BolC04g040120.2J;BolC04g044400.2J;BolC04g053840.2J;BolC04g061940.2J;BolC05g012850.2J;BolC05g013190.2J;BolC05g025430.2J;BolC05g025560.2J;BolC05g041490.2J;BolC05g049940.2J;BolC06g000940.2J;BolC06g002670.2J;BolC06g012860.2J;BolC06g025400.2J;BolC06g0…	K05658+K05658+K05677+K05681+K05681+K05681+K05658+K05658+K08712+K05681+K05656+K08712+K05658+K08712+K08712+K05658+K05658+K05665+K08712+K05665+K05666+K05681+K05665+K08712+K05656+K05681+K05681+K05674+K05658+K05658+K05681+K05681	Down
Lysine biosynthesis	ko00300	12	54	3261	19416	BolC01g013420.2J;BolC02g017330.2J;BolC03g005590.2J;BolC03g006860.2J;BolC03g080360.2J;BolC04g067430.2J;BolC05g014680.2J;BolC06g020890.2J;BolC08g025370.2J;BolC08g025390.2J;BolC09g051340.2J;BolC09g060870.2J	K12524+K00928+K01586+K00928+K10206+K01714+K01778+K01778+K00133+K00133+K00003+K01586	Down
RNA degradation	ko03018	53	645	3261	19416	BolC01g009960.2J;BolC01g009980.2J;BolC01g042120.2J;BolC01g048630.2J;BolC02g011500.2J;BolC02g035810.2J;BolC03g002830.2J;BolC03g014370.2J;BolC03g019770.2J;BolC03g021550.2J;BolC03g035360.2J;BolC03g036680.2J;BolC03g051500.2J;BolC03g064550.2J;BolC03g065850.2J;BolC03g079970.2J;BolC03g086220.2J;BolC04g021700.2J;BolC04g024370.2J;BolC04g043040.2J;BolC04g050650.2J;BolC04g060310.2J;BolC04g061680.2J;BolC04g0…	K00850+K00850+K12606+K12620+K12581+K12581+K04077+K04077+K04077+K01689+K12614+K00962+K13126+K12581+K12590+K13126+K04077+K10643+K12619+K07573+K13126+K12603+K00850+K01689+K12581+K04077+K12617+K12603+K08311+K00850+K14442+K04077+K00850+K12625+K01689+K08311+K04077+K12626+K12621+K12608+K04077+K10643+K13126+K00850+K13126+K00850+K12608+K12581+K12580+K12598+K04077+K12608+K13126	Down
Folate biosynthesis	ko00790	16	62	3261	19416	BolC01g004210.2J;BolC01g050940.2J;BolC01g052470.2J;BolC03g013590.2J;BolC03g017450.2J;BolC03g056520.2J;BolC03g078430.2J;BolC04g021330.2J;BolC05g027350.2J;BolC05g054910.2J;BolC06g049550.2J;BolC07g028910.2J;BolC08g039670.2J;BolC08g058400.2J;BolC09g033530.2J;Brassica_oleracea_newGene_9275	K13998+K01633+K01930+K18482+K01724+K14652+K15631+K13950+K01724+K01633+K01307+K20457+K01930+K15376+K15631+K15376	Down
Porphyrin and chlorophyll metabolism	ko00860	43	121	3261	19416	BolC01g012110.2J;BolC01g016420.2J;BolC01g020090.2J;BolC01g027330.2J;BolC01g034710.2J;BolC01g051800.2J;BolC02g003310.2J;BolC02g014340.2J;BolC02g031040.2J;BolC02g046190.2J;BolC03g002100.2J;BolC03g003870.2J;BolC03g006560.2J;BolC03g029600.2J;BolC03g057300.2J;BolC03g078350.2J;BolC04g064550.2J;BolC05g001110.2J;BolC05g014380.2J;BolC05g017390.2J;BolC05g026630.2J;BolC05g051330.2J;BolC06g000290.2J;BolC06g0…	K03405+K22013+K13071+K04040+K02492+K13544+K01749+K13544+K10960+K03405+K13606+K01749+K03403+K13071+K01845+K22013+K01599+K00231+K01845+K08099+K21480+K01599+K22013+K13600+K04035+K01698+K10960+K01772+K03405+K03428+K00218+K13600+K13544+K13544+K04035+K01772+K02492+K01845+K02492+K02259+K19073+K00231+K01749	Down
Plant hormone signal transduction	ko04075	169	1153	3261	19416	BolC01g001470.2J;BolC01g001980.2J;BolC01g002280.2J;BolC01g006520.2J;BolC01g010090.2J;BolC01g011310.2J;BolC01g011540.2J;BolC01g011570.2J;BolC01g012590.2J;BolC01g016010.2J;BolC01g017950.2J;BolC01g020230.2J;BolC01g028740.2J;BolC01g030460.2J;BolC01g038020.2J;BolC01g039620.2J;BolC01g044930.2J;BolC01g047380.2J;BolC01g049880.2J;BolC02g000300.2J;BolC02g003970.2J;BolC02g005590.2J;BolC02g010840.2J;BolC02g0…	K14494+K14506+K14494+K13464+K14484+K13422+K14500+K14491+K14503+K14488+K13416+K14504+K14505+K14492+K14491+K14484+K13464+K14484+K14491+K14497+K14431+K14487+K14486+K14504+K14504+K14496+K14494+K13415+K13464+K13464+K13464+K14488+K14503+K14491+K14491+K14517+K14485+K13415+K14494+K13463+K13415+K13946+K14488+K14514+K12126+K13415+K12126+K14484+K14491+K13413+K13449+K14498+K14506+K14505+K13464+K14494+K14487+…	Down
RNA polymerase	ko03020	5	230	3261	19416	BolC02g037530.2J;BolC03g017590.2J;BolCnng000950.2J;Brassica_oleracea_newGene_1373;Brassica_oleracea_newGene_1940	K03024+K03011+K03043+K03009+K03006	Down
Biotin metabolism	ko00780	12	53	3261	19416	BolC03g004560.2J;BolC03g050600.2J;BolC03g068930.2J;BolC04g004840.2J;BolC04g049390.2J;BolC05g024630.2J;BolC06g031220.2J;BolC06g046250.2J;BolC07g009450.2J;BolC07g017770.2J;BolC07g028880.2J;BolC09g067400.2J	K02372+K00208+K00059+K01012+K02372+K00059+K09458+K09458+K00208+K00059+K09458+K00652	Down

## Sheet: H4 vs H12
Table S6. Statistical analysis of KEGG enrichment results for differentially expressed genes.
Pathway	ko_ID	DEgene	gene	DEgene_all	gene_all	Gene_id	KOs	Up/Down
Plant hormone signal transduction	ko04075	23	1153	310	19416	BolC01g020700.2J;BolC01g036230.2J;BolC01g051280.2J;BolC01g051360.2J;BolC03g066110.2J;BolC03g072680.2J;BolC04g001430.2J;BolC04g001700.2J;BolC04g005090.2J;BolC04g061550.2J;BolC05g001100.2J;BolC05g024080.2J;BolC05g042490.2J;BolC06g005320.2J;BolC06g025150.2J;BolC06g026850.2J;BolC07g039220.2J;BolC07g048100.2J;BolC07g057400.2J;BolC08g057620.2J;BolC08g057860.2J;BolC09g007850.2J;BolC09g063900.2J	K14508+K14498+K14497+K14497+K14491+K13415+K13415+K12126+K14512+K14432+K12126+K13415+K14514+K14494+K14494+K12126+K14493+K14503+K14432+K14497+K13413+K14486+K16189	Up
Ether lipid metabolism	ko00565	3	78	310	19416	BolC03g043980.2J;BolC05g005180.2J;BolC09g034640.2J	K01115+K01114+K01114	Up
ABC transporters	ko02010	1	208	310	19416	BolC03g050850.2J	K05681	Up
Zeatin biosynthesis	ko00908	1	92	310	19416	BolC01g031740.2J	K13493	Up
Flavonoid biosynthesis	ko00941	1	147	310	19416	BolC08g039120.2J	K01859	Up
Sulfur relay system	ko04122	1	23	310	19416	BolC09g042700.2J	K11996	Up
Glucosinolate biosynthesis	ko00966	1	137	310	19416	BolC08g021600.2J	K00826	Up
Purine metabolism	ko00230	18	315	310	19416	BolC01g041630.2J;BolC02g019750.2J;BolC02g037720.2J;BolC02g052920.2J;BolC03g014490.2J;BolC03g086410.2J;BolC04g009910.2J;BolC04g013910.2J;BolC04g032470.2J;BolC04g062180.2J;BolC04g062540.2J;BolC05g013910.2J;BolC05g041770.2J;BolC06g031700.2J;BolC07g006800.2J;BolC09g039660.2J;BolC09g063530.2J;Brassica_oleracea_newGene_5534	K01923+K00873+K00106+K10808+K00873+K00940+K01490+K00602+K00873+K00939+K11808+K00088+K01923+K01952+K00764+K00873+K00873+K13811	Up
Glycosphingolipid biosynthesis - ganglio series	ko00604	1	70	310	19416	BolC09g027690.2J	K12309	Up
Valine, leucine and isoleucine biosynthesis	ko00290	1	61	310	19416	BolC08g021600.2J	K00826	Up
Plant-pathogen interaction	ko04626	24	1497	310	19416	BolC01g004240.2J;BolC01g031670.2J;BolC01g053590.2J;BolC02g001960.2J;BolC02g046020.2J;BolC02g057640.2J;BolC03g018020.2J;BolC04g003520.2J;BolC04g005090.2J;BolC04g016120.2J;BolC04g016150.2J;BolC04g019690.2J;BolC06g005890.2J;BolC06g026460.2J;BolC06g027920.2J;BolC06g040320.2J;BolC07g040970.2J;BolC07g046110.2J;BolC07g055670.2J;BolC08g026950.2J;BolC08g044690.2J;BolC08g057860.2J;Brassica_oleracea_newGene…	K18878+K13457+K09487+K15397+K13459+K13424+K13423+K13412+K14512+K13466+K13466+K13423+K18878+K13434+K00864+K18878+K13434+K01373+K13424+K13448+K13434+K13413+K13460+K13456	Up
Biosynthesis of amino acids	ko01230	10	701	310	19416	BolC02g019750.2J;BolC03g014490.2J;BolC04g032470.2J;BolC05g016730.2J;BolC08g021600.2J;BolC08g050400.2J;BolC08g052950.2J;BolC09g039660.2J;BolC09g059180.2J;BolC09g063530.2J	K00873+K00873+K00873+K00789+K00826+K00789+K00133+K00873+K01689+K00873	Up
Other glycan degradation	ko00511	3	140	310	19416	BolC02g052030.2J;BolC04g037790.2J;BolC09g027690.2J	K01191+K01190+K12309	Up
Valine, leucine and isoleucine degradation	ko00280	5	135	310	19416	BolC02g048570.2J;BolC03g072890.2J;BolC07g037360.2J;BolC08g021600.2J;BolC09g018470.2J	K00626+K00827+K00626+K00826+K01968	Up
Carbon metabolism	ko01200	17	784	310	19416	BolC01g012240.2J;BolC02g019750.2J;BolC02g048570.2J;BolC02g062950.2J;BolC03g014490.2J;BolC04g016100.2J;BolC04g016130.2J;BolC04g032470.2J;BolC05g000770.2J;BolC05g018430.2J;BolC05g027750.2J;BolC06g051280.2J;BolC07g037360.2J;BolC08g028740.2J;BolC09g039660.2J;BolC09g059180.2J;BolC09g063530.2J	K01595+K00873+K00626+K01610+K00873+K03841+K03841+K00873+K00161+K01913+K00162+K15919+K00626+K03781+K00873+K01689+K00873	Up
MAPK signaling pathway - plant	ko04016	13	1141	310	19416	BolC01g036230.2J;BolC01g051280.2J;BolC01g051360.2J;BolC02g057640.2J;BolC03g018020.2J;BolC03g086410.2J;BolC04g005090.2J;BolC04g019690.2J;BolC05g042490.2J;BolC07g055670.2J;BolC08g028740.2J;BolC08g057620.2J;BolC08g057860.2J	K14498+K14497+K14497+K13424+K13423+K00940+K14512+K13423+K14514+K13424+K03781+K14497+K13413	Up
Endocytosis	ko04144	10	615	310	19416	BolC01g003310.2J;BolC01g050320.2J;BolC03g043980.2J;BolC04g040400.2J;BolC04g063350.2J;BolC06g029680.2J;BolC08g024600.2J;BolC08g025810.2J;BolC08g035100.2J;BolC09g065790.2J	K19476+K03283+K01115+K04645+K12183+K12479+K19476+K03283+K12189+K17917	Up
Amino sugar and nucleotide sugar metabolism	ko00520	7	867	310	19416	BolC02g026190.2J;BolC04g018340.2J;BolC04g058570.2J;BolC06g025090.2J;BolC07g037790.2J;BolC09g003150.2J;Brassica_oleracea_newGene_6544	K00326+K00847+K01183+K00847+K01183+K16190+K12447	Up
Spliceosome	ko03040	22	672	310	19416	BolC01g013510.2J;BolC01g024540.2J;BolC01g035630.2J;BolC01g050320.2J;BolC02g005390.2J;BolC02g017770.2J;BolC03g004620.2J;BolC03g056600.2J;BolC03g080950.2J;BolC04g057530.2J;BolC05g002200.2J;BolC05g002670.2J;BolC05g025700.2J;BolC05g046520.2J;BolC05g051960.2J;BolC07g021870.2J;BolC07g021920.2J;BolC08g002230.2J;BolC08g025810.2J;BolC09g000830.2J;BolC09g009100.2J;BolC09g056400.2J	K12856+K12813+K12844+K03283+K12815+K12854+K12818+K12891+K12818+K12856+K12819+K10599+K12843+K12823+K12818+K12854+K12854+K12852+K03283+K12827+K12828+K11984	Up
Glycolysis / Gluconeogenesis	ko00010	13	342	310	19416	BolC02g019750.2J;BolC02g062950.2J;BolC03g014490.2J;BolC04g016100.2J;BolC04g016130.2J;BolC04g032470.2J;BolC05g000770.2J;BolC05g018430.2J;BolC05g027750.2J;BolC09g039660.2J;BolC09g043160.2J;BolC09g059180.2J;BolC09g063530.2J	K00873+K01610+K00873+K03841+K03841+K00873+K00161+K01913+K00162+K00873+K00895+K01689+K00873	Up
Pentose phosphate pathway	ko00030	3	156	310	19416	BolC04g016100.2J;BolC04g016130.2J;BolC09g043160.2J	K03841+K03841+K00895	Up
Selenocompound metabolism	ko00450	1	65	310	19416	Brassica_oleracea_newGene_5534	K13811	Up
RNA transport	ko03013	22	786	310	19416	BolC01g048620.2J;BolC01g051390.2J;BolC02g012900.2J;BolC02g039160.2J;BolC03g008670.2J;BolC03g040900.2J;BolC03g085730.2J;BolC04g017960.2J;BolC06g015650.2J;BolC06g028620.2J;BolC06g050210.2J;BolC07g024850.2J;BolC07g038410.2J;BolC07g042350.2J;BolC07g055790.2J;BolC07g060500.2J;BolC09g015350.2J;BolC09g016910.2J;BolC09g056260.2J;Brassica_oleracea_newGene_5149;Brassica_oleracea_newGene_6012;Brassica_olera…	K14301+K03248+K03539+K14300+K14290+K03248+K03113+K03231+K03113+K09291+K09291+K14310+K03238+K00974+K02516+K14311+K14297+K03231+K14290+K14300+K03113+K14300	Up
Homologous recombination	ko03440	3	620	310	19416	BolC03g061070.2J;BolC05g032290.2J;BolC09g040420.2J	K04728+K02335+K07466	Up
Fatty acid degradation	ko00071	2	107	310	19416	BolC02g048570.2J;BolC07g037360.2J	K00626+K00626	Up
Carbon fixation in photosynthetic organisms	ko00710	4	278	310	19416	BolC01g012240.2J;BolC02g062950.2J;BolC04g016100.2J;BolC04g016130.2J	K01595+K01610+K03841+K03841	Up
Propanoate metabolism	ko00640	2	126	310	19416	BolC02g048570.2J;BolC07g037360.2J	K00626+K00626	Up
Diterpenoid biosynthesis	ko00904	5	172	310	19416	BolC09g064340.2J;Brassica_oleracea_newGene_4689;Brassica_oleracea_newGene_692;Brassica_oleracea_newGene_7940;Brassica_oleracea_newGene_7942	K05282+K04125+K04125+K04125+K04125	Up
Terpenoid backbone biosynthesis	ko00900	3	114	310	19416	BolC02g048570.2J;BolC03g056960.2J;BolC07g037360.2J	K00626+K05906+K00626	Up
Glycerolipid metabolism	ko00561	2	284	310	19416	BolC05g051240.2J;BolC06g027920.2J	K00655+K00864	Up
Thiamine metabolism	ko00730	1	46	310	19416	BolC04g062180.2J	K00939	Up
Ubiquitin mediated proteolysis	ko04120	14	483	310	19416	BolC02g061110.2J;BolC03g038910.2J;BolC04g018140.2J;BolC04g018150.2J;BolC04g053060.2J;BolC05g002670.2J;BolC06g026950.2J;BolC06g029940.2J;BolC06g041210.2J;BolC07g020140.2J;BolC09g008940.2J;BolC09g020840.2J;BolC09g020870.2J;BolC09g020900.2J	K10573+K10260+K03363+K03363+K04506+K10599+K02977+K08770+K10573+K02977+K10615+K10592+K10592+K10592	Up
Lysine degradation	ko00310	4	103	310	19416	BolC02g048570.2J;BolC06g016280.2J;BolC06g044530.2J;BolC07g037360.2J	K00626+K22748+K11420+K00626	Up
2-Oxocarboxylic acid metabolism	ko01210	2	293	310	19416	BolC08g021600.2J;BolC08g052950.2J	K00826+K00133	Up
One carbon pool by folate	ko00670	1	57	310	19416	BolC04g013910.2J	K00602	Up
Ascorbate and aldarate metabolism	ko00053	2	389	310	19416	BolC09g003150.2J;Brassica_oleracea_newGene_6544	K16190+K12447	Up
Peroxisome	ko04146	2	276	310	19416	BolC02g037720.2J;BolC08g028740.2J	K00106+K03781	Up
mRNA surveillance pathway	ko03015	7	349	310	19416	BolC01g009350.2J;BolC03g014990.2J;BolC04g059300.2J;BolC07g007470.2J;BolC09g043660.2J;BolC09g054560.2J;BolC09g062050.2J	K14397+K14398+K14411+K08873+K14398+K14404+K14409	Up
Phenylpropanoid biosynthesis	ko00940	5	734	310	19416	BolC02g063080.2J;BolC03g077050.2J;BolC08g043460.2J;BolC08g043480.2J;Brassica_oleracea_newGene_4640	K00430+K22395+K01188+K01188+K00430	Up
Inositol phosphate metabolism	ko00562	3	240	310	19416	BolC01g053340.2J;BolC05g005180.2J;BolC09g034640.2J	K05857+K01114+K01114	Up
Biosynthesis of unsaturated fatty acids	ko01040	1	46	310	19416	BolC01g031750.2J	K03921	Up
Arachidonic acid metabolism	ko00590	1	77	310	19416	BolC03g059700.2J	K00079	Up
Pyrimidine metabolism	ko00240	3	169	310	19416	BolC02g052920.2J;BolC03g086410.2J;BolC06g021500.2J	K10808+K00940+K13421	Up
Photosynthesis	ko00195	4	247	310	19416	BolC01g026900.2J;BolC05g028480.2J;Brassica_oleracea_newGene_2928;Brassica_oleracea_newGene_4238	K02111+K02641+K02111+K02111	Up
Starch and sucrose metabolism	ko00500	13	629	310	19416	BolC01g007930.2J;BolC01g024000.2J;BolC01g026340.2J;BolC02g010500.2J;BolC04g012540.2J;BolC04g018340.2J;BolC04g061650.2J;BolC05g010580.2J;BolC06g025090.2J;BolC08g031650.2J;BolC08g043460.2J;BolC08g043480.2J;BolC09g000230.2J	K19893+K01177+K01176+K00696+K00700+K00847+K00700+K01193+K00847+K00695+K01188+K01188+K19891	Up
Folate biosynthesis	ko00790	1	62	310	19416	BolC03g059700.2J	K00079	Up
Arginine and proline metabolism	ko00330	1	204	310	19416	BolC09g064460.2J	K01426	Up
Mismatch repair	ko03430	1	513	310	19416	BolC09g040420.2J	K07466	Up
Glycine, serine and threonine metabolism	ko00260	4	209	310	19416	BolC03g072890.2J;BolC06g051280.2J;BolC07g054900.2J;BolC08g052950.2J	K00827+K15919+K00499+K00133	Up
Phenylalanine metabolism	ko00360	1	135	310	19416	BolC09g064460.2J	K01426	Up
Caffeine metabolism	ko00232	1	6	310	19416	BolC02g037720.2J	K00106	Up
Circadian rhythm - plant	ko04712	17	227	310	19416	BolC01g053660.2J;BolC02g059060.2J;BolC03g027570.2J;BolC03g039130.2J;BolC04g001700.2J;BolC04g007080.2J;BolC05g001100.2J;BolC05g021100.2J;BolC05g058080.2J;BolC06g026850.2J;BolC07g003350.2J;BolC07g037380.2J;BolC07g043430.2J;BolC08g002590.2J;BolC08g056510.2J;BolC09g006740.2J;BolC09g007640.2J	K12135+K12130+K16221+K12135+K12126+K16221+K12126+K12124+K12135+K12126+K12115+K12135+K12127+K12129+K12120+K12130+K12127	Up
Fatty acid elongation	ko00062	1	75	310	19416	BolC02g001960.2J	K15397	Up
Carotenoid biosynthesis	ko00906	2	91	310	19416	BolC03g046160.2J;BolC04g053960.2J	K09843+K09842	Up
Sphingolipid metabolism	ko00600	4	179	310	19416	BolC02g059740.2J;BolC04g037790.2J;BolC05g031530.2J;BolC09g027690.2J	K04718+K01190+K12349+K12309	Up
Steroid biosynthesis	ko00100	1	88	310	19416	BolC03g006590.2J	K00559	Up
Base excision repair	ko03410	2	116	310	19416	BolC01g004810.2J;BolC05g032290.2J	K10773+K02335	Up
Fructose and mannose metabolism	ko00051	5	179	310	19416	BolC04g016100.2J;BolC04g016130.2J;BolC04g018340.2J;BolC06g025090.2J;BolC09g043160.2J	K03841+K03841+K00847+K00847+K00895	Up
Pentose and glucuronate interconversions	ko00040	6	694	310	19416	BolC02g033220.2J;BolC05g056920.2J;BolC07g032350.2J;BolC07g038970.2J;BolC09g003150.2J;Brassica_oleracea_newGene_6544	K01051+K01728+K01728+K01051+K16190+K12447	Up
Fatty acid biosynthesis	ko00061	1	105	310	19416	BolC01g031750.2J	K03921	Up
Protein processing in endoplasmic reticulum	ko04141	8	701	310	19416	BolC01g022530.2J;BolC01g050320.2J;BolC01g053590.2J;BolC02g022760.2J;BolC03g036260.2J;BolC03g053050.2J;BolC05g004570.2J;BolC08g025810.2J	K10666+K03283+K09487+K16196+K10839+K08852+K13993+K03283	Up
Pyruvate metabolism	ko00620	12	298	310	19416	BolC01g012240.2J;BolC02g019750.2J;BolC02g048570.2J;BolC02g062950.2J;BolC03g014490.2J;BolC04g032470.2J;BolC05g000770.2J;BolC05g018430.2J;BolC05g027750.2J;BolC07g037360.2J;BolC09g039660.2J;BolC09g063530.2J	K01595+K00873+K00626+K01610+K00873+K00873+K00161+K01913+K00162+K00626+K00873+K00873	Up
Monobactam biosynthesis	ko00261	2	35	310	19416	BolC08g052950.2J;Brassica_oleracea_newGene_5534	K00133+K13811	Up
Autophagy - other	ko04136	2	101	310	19416	BolC06g004530.2J;BolC09g036260.2J	K07203+K17890	Up
Cysteine and methionine metabolism	ko00270	7	354	310	19416	BolC03g032350.2J;BolC03g072890.2J;BolC05g016730.2J;BolC06g018540.2J;BolC08g021600.2J;BolC08g050400.2J;BolC08g052950.2J	K00558+K00827+K00789+K17398+K00826+K00789+K00133	Up
SNARE interactions in vesicular transport	ko04130	3	107	310	19416	BolC03g020490.2J;BolC06g024020.2J;BolC07g047140.2J	K08486+K08504+K08488	Up
Ribosome	ko03010	9	783	310	19416	BolC01g034990.2J;BolC02g035850.2J;BolC02g052940.2J;BolC04g054330.2J;BolC04g067350.2J;BolC05g058070.2J;BolC06g026950.2J;BolC07g020140.2J;BolC08g007910.2J	K02981+K02937+K02996+K02990+K02953+K02942+K02977+K02977+K02965	Up
RNA polymerase	ko03020	5	230	310	19416	BolC02g054830.2J;BolC03g075230.2J;BolC07g037590.2J;BolC08g041670.2J;BolC09g003620.2J	K03006+K03006+K03013+K02999+K03014	Up
Synthesis and degradation of ketone bodies	ko00072	2	11	310	19416	BolC02g048570.2J;BolC07g037360.2J	K00626+K00626	Up
Glycerophospholipid metabolism	ko00564	5	322	310	19416	BolC03g043980.2J;BolC05g005180.2J;BolC05g051240.2J;BolC05g063510.2J;BolC09g034640.2J	K01115+K01114+K00655+K22389+K01114	Up
Oxidative phosphorylation	ko00190	4	573	310	19416	BolC01g026900.2J;BolC08g018550.2J;Brassica_oleracea_newGene_2928;Brassica_oleracea_newGene_4238	K02111+K03942+K02111+K02111	Up
Cyanoamino acid metabolism	ko00460	2	256	310	19416	BolC08g043460.2J;BolC08g043480.2J	K01188+K01188	Up
Phosphatidylinositol signaling system	ko04070	1	257	310	19416	BolC01g053340.2J	K05857	Up
Porphyrin and chlorophyll metabolism	ko00860	2	121	310	19416	BolC07g046490.2J;BolC07g050180.2J	K13544+K22013	Up
Glyoxylate and dicarboxylate metabolism	ko00630	6	354	310	19416	BolC02g048570.2J;BolC03g026580.2J;BolC05g018430.2J;BolC06g051280.2J;BolC07g037360.2J;BolC08g028740.2J	K00626+K22133+K01913+K15919+K00626+K03781	Up
Butanoate metabolism	ko00650	3	71	310	19416	BolC02g048570.2J;BolC05g018430.2J;BolC07g037360.2J	K00626+K01913+K00626	Up
Glutathione metabolism	ko00480	5	247	310	19416	BolC01g052930.2J;BolC02g052920.2J;BolC03g018460.2J;BolC04g037610.2J;Brassica_oleracea_newGene_4405	K00799+K10808+K00799+K00383+K00799	Up
Proteasome	ko03050	4	300	310	19416	BolC03g042410.2J;BolC04g058750.2J;BolC07g000350.2J;Brassica_oleracea_newGene_7696	K06699+K03035+K03028+K02737	Up
Phagosome	ko04145	2	257	310	19416	BolC01g014110.2J;BolC07g047140.2J	K07375+K08488	Up
RNA degradation	ko03018	8	645	310	19416	BolC02g008990.2J;BolC03g073570.2J;BolC04g000650.2J;BolC04g019070.2J;BolC04g057000.2J;BolC08g060910.2J;BolC09g012580.2J;BolC09g059180.2J	K04077+K04043+K14442+K14442+K14442+K12604+K12585+K01689	Up
Pantothenate and CoA biosynthesis	ko00770	1	111	310	19416	BolC08g021600.2J	K00826	Up
Glycosaminoglycan degradation	ko00531	1	79	310	19416	BolC09g027690.2J	K12309	Up
Fatty acid metabolism	ko01212	3	155	310	19416	BolC01g031750.2J;BolC02g048570.2J;BolC07g037360.2J	K03921+K00626+K00626	Up
Alanine, aspartate and glutamate metabolism	ko00250	2	147	310	19416	BolC03g072890.2J;BolC07g006800.2J	K00827+K00764	Up
Betalain biosynthesis	ko00965	1	56	310	19416	BolC07g036350.2J	K15777	Up
Basal transcription factors	ko03022	3	125	310	19416	BolC02g062200.2J;BolC03g056390.2J;BolC08g051110.2J	K03122+K03122+K02202	Up
Ribosome biogenesis in eukaryotes	ko03008	30	296	310	19416	BolC01g026000.2J;BolC02g012900.2J;BolC02g023110.2J;BolC02g023140.2J;BolC02g037740.2J;BolC03g008670.2J;BolC03g015450.2J;BolC03g033230.2J;BolC03g035720.2J;BolC03g038750.2J;BolC03g086760.2J;BolC05g002860.2J;BolC05g011100.2J;BolC05g013100.2J;BolC05g024930.2J;BolC05g058660.2J;BolC05g059110.2J;BolC06g002000.2J;BolC07g023510.2J;BolC07g039130.2J;BolC08g019060.2J;BolC08g019730.2J;BolC08g022030.2J;BolC08g0…	K14556+K03539+K14572+K14572+K14567+K14290+K14570+K14554+K14571+K14538+K14564+K06943+K14544+K14558+K14548+K14538+K14550+K11108+K14570+K14565+K14557+K14539+K14521+K14521+K14573+K14561+K14290+K14546+K11128+K11128	Up
Galactose metabolism	ko00052	4	419	310	19416	BolC04g037790.2J;BolC05g010580.2J;BolC09g027690.2J;Brassica_oleracea_newGene_6544	K01190+K01193+K12309+K12447	Up
Citrate cycle (TCA cycle)	ko00020	3	250	310	19416	BolC02g062950.2J;BolC05g000770.2J;BolC05g027750.2J	K01610+K00161+K00162	Up
alpha-Linolenic acid metabolism	ko00592	1	117	310	19416	BolC05g063510.2J	K22389	Up
DNA replication	ko03030	2	598	310	19416	BolC05g032290.2J;BolC09g040420.2J	K02335+K07466	Up
Sulfur metabolism	ko00920	1	90	310	19416	Brassica_oleracea_newGene_5534	K13811	Up
Lysine biosynthesis	ko00300	1	54	310	19416	BolC08g052950.2J	K00133	Up
Tryptophan metabolism	ko00380	6	212	310	19416	BolC01g010470.2J;BolC02g036240.2J;BolC02g048570.2J;BolC07g037360.2J;BolC08g028740.2J;BolC09g064460.2J	K11816+K23947+K00626+K00626+K03781+K01426	Up
Nucleotide excision repair	ko03420	4	561	310	19416	BolC03g036260.2J;BolC05g032290.2J;BolC08g051110.2J;BolC09g040420.2J	K10839+K02335+K02202+K07466	Up
Aminoacyl-tRNA biosynthesis	ko00970	2	388	310	19416	BolC03g079580.2J;BolC05g024060.2J	K02433+K01886	Up
Porphyrin and chlorophyll metabolism	ko00860	13	121	691	19416	BolC01g020090.2J;BolC01g034710.2J;BolC02g014340.2J;BolC03g006560.2J;BolC03g029600.2J;BolC05g014380.2J;BolC05g017390.2J;BolC06g000290.2J;BolC06g000550.2J;BolC08g007540.2J;BolC08g040820.2J;BolC09g021260.2J;BolC09g058890.2J	K13071+K02492+K13544+K03403+K13071+K01845+K08099+K22013+K13600+K13600+K04035+K02492+K00231	Down
Ubiquitin mediated proteolysis	ko04120	7	483	691	19416	BolC01g002490.2J;BolC02g001000.2J;BolC04g038420.2J;BolC04g061260.2J;BolC05g045100.2J;BolC05g046050.2J;BolC08g039620.2J	K10688+K10604+K10615+K10260+K10260+K10260+K10615	Down
Histidine metabolism	ko00340	5	73	691	19416	BolC01g004630.2J;BolC04g025300.2J;BolC05g035450.2J;BolC09g022110.2J;BolC09g022170.2J	K00128+K00765+K01590+K01590+K01590	Down
Glycerolipid metabolism	ko00561	19	284	691	19416	BolC01g004630.2J;BolC01g007260.2J;BolC02g003370.2J;BolC03g000540.2J;BolC03g003960.2J;BolC03g015330.2J;BolC03g085460.2J;BolC03g085470.2J;BolC04g024660.2J;BolC04g024670.2J;BolC05g052290.2J;BolC05g062830.2J;BolC06g009020.2J;BolC06g017380.2J;BolC06g032240.2J;BolC06g044930.2J;BolC08g027020.2J;BolC08g037830.2J;BolC09g057040.2J	K00128+K03715+K07407+K06119+K07407+K00679+K00679+K00679+K00679+K00679+K00679+K18693+K00679+K07407+K01054+K01054+K01054+K00002+K01054	Down
Plant hormone signal transduction	ko04075	50	1153	691	19416	BolC01g001470.2J;BolC01g002080.2J;BolC01g030460.2J;BolC01g044930.2J;BolC02g015510.2J;BolC02g025820.2J;BolC02g027560.2J;BolC02g029390.2J;BolC02g031300.2J;BolC02g047670.2J;BolC03g002370.2J;BolC04g000600.2J;BolC04g002090.2J;BolC04g008970.2J;BolC04g009870.2J;BolC04g053020.2J;BolC04g064010.2J;BolC04g064230.2J;BolC04g064990.2J;BolC05g027270.2J;BolC05g037770.2J;BolC05g052330.2J;BolC06g003240.2J;BolC06g0…	K14494+K14491+K14492+K13464+K13422+K13415+K13464+K13464+K13464+K14517+K14496+K14487+K13422+K13464+K14491+K14515+K13463+K14491+K14432+K13416+K13422+K14494+K14487+K14488+K14486+K13464+K13464+K13464+K14488+K14491+K12126+K14491+K13422+K13422+K14517+K13415+K14487+K14487+K14494+K13422+K13464+K14492+K13422+K13464+K14431+K14488+K14484+K13422+K14517+K14494	Down
Cyanoamino acid metabolism	ko00460	14	256	691	19416	BolC01g001230.2J;BolC01g001500.2J;BolC01g002040.2J;BolC02g011540.2J;BolC03g002080.2J;BolC03g003150.2J;BolC03g013050.2J;BolC03g064500.2J;BolC03g073550.2J;BolC04g031550.2J;BolC04g042740.2J;BolC05g054440.2J;BolC07g011370.2J;BolC07g011390.2J	K00600+K01455+K20802+K13035+K05349+K01188+K01188+K01501+K00600+K13034+K01188+K01188+K01188+K01188	Down
Nitrogen metabolism	ko00910	15	133	691	19416	BolC01g001500.2J;BolC02g006420.2J;BolC02g006560.2J;BolC02g022220.2J;BolC02g027190.2J;BolC03g000160.2J;BolC03g064500.2J;BolC04g042400.2J;BolC05g062140.2J;BolC06g041790.2J;BolC06g048810.2J;BolC08g012040.2J;BolC09g055090.2J;BolC09g064520.2J;BolC09g067870.2J	K01455+K02575+K01673+K01915+K01673+K01915+K01501+K01915+K01673+K01673+K10534+K01915+K00261+K00261+K00284	Down
Flavonoid biosynthesis	ko00941	6	147	691	19416	BolC02g002400.2J;BolC02g061690.2J;BolC04g056710.2J;BolC06g044770.2J;BolC08g036870.2J;BolC09g063480.2J	K05278+K05278+K00487+K13082+K01859+K05278	Down
Alanine, aspartate and glutamate metabolism	ko00250	10	147	691	19416	BolC02g022220.2J;BolC03g000160.2J;BolC03g055630.2J;BolC04g042400.2J;BolC05g021660.2J;BolC06g042010.2J;BolC08g012040.2J;BolC08g030530.2J;BolC09g055090.2J;BolC09g064520.2J	K01915+K01915+K01953+K01915+K14272+K14272+K01915+K14272+K00261+K00261	Down
DNA replication	ko03030	3	598	691	19416	BolC02g026460.2J;BolC05g006910.2J;BolC09g045920.2J	K07466+K07466+K07466	Down
Ribosome	ko03010	14	783	691	19416	BolC01g054920.2J;BolC04g046550.2J;BolC04g066790.2J;BolC05g031360.2J;BolC05g053570.2J;BolC07g017530.2J;BolC07g033830.2J;BolC07g059530.2J;BolC08g042870.2J;BolC08g058970.2J;BolC09g013940.2J;BolC09g050650.2J;BolC09g068960.2J;BolCnng000900.2J	K02891+K02899+K02937+K02867+K02946+K02880+K02876+K02935+K02987+K02933+K02910+K02865+K02918+K02886	Down
Amino sugar and nucleotide sugar metabolism	ko00520	23	867	691	19416	BolC02g009430.2J;BolC02g013520.2J;BolC03g005830.2J;BolC03g023990.2J;BolC03g035710.2J;BolC03g041850.2J;BolC03g041890.2J;BolC03g044560.2J;BolC03g067110.2J;BolC04g044520.2J;BolC04g055310.2J;BolC04g063870.2J;BolC05g010310.2J;BolC05g044690.2J;BolC05g054200.2J;BolC06g008530.2J;BolC07g010610.2J;BolC07g038650.2J;BolC08g024320.2J;BolC08g035480.2J;BolC09g055470.2J;BolC09g063090.2J;Brassica_oleracea_newGene…	K00975+K08678+K01097+K00966+K16190+K20547+K20547+K12447+K13648+K00012+K08678+K00966+K12451+K15920+K20547+K12450+K00975+K10046+K16190+K01711+K00326+K15920+K01809	Down
RNA transport	ko03013	5	786	691	19416	BolC02g023490.2J;BolC03g015380.2J;BolC05g027010.2J;BolC08g018440.2J;Brassica_oleracea_newGene_1812	K14308+K03113+K03251+K12160+K14300	Down
Autophagy - other	ko04136	1	101	691	19416	BolC01g057180.2J	K17908	Down
Inositol phosphate metabolism	ko00562	11	240	691	19416	BolC01g011550.2J;BolC03g035180.2J;BolC04g001810.2J;BolC04g036010.2J;BolC06g001840.2J;BolC07g046290.2J;BolC07g052660.2J;BolC08g048680.2J;BolC09g000720.2J;BolC09g019640.2J;Brassica_oleracea_newGene_5033	K24221+K01092+K01092+K18081+K20279+K05857+K00469+K01858+K01092+K00889+K00469	Down
Limonene and pinene degradation	ko00903	1	19	691	19416	BolC01g004630.2J	K00128	Down
Benzoxazinoid biosynthesis	ko00402	1	31	691	19416	BolC03g012510.2J	K13229	Down
beta-Alanine metabolism	ko00410	4	167	691	19416	BolC01g004630.2J;BolC03g025860.2J;BolC05g007100.2J;BolC08g056630.2J	K00128+K00276+K05605+K05605	Down
Homologous recombination	ko03440	4	620	691	19416	BolC02g026460.2J;BolC02g032250.2J;BolC05g006910.2J;BolC09g045920.2J	K07466+K12173+K07466+K07466	Down
One carbon pool by folate	ko00670	5	57	691	19416	BolC01g001230.2J;BolC03g041770.2J;BolC03g073550.2J;BolC05g054300.2J;BolC06g025320.2J	K00600+K00288+K00600+K00288+K00297	Down
Nicotinate and nicotinamide metabolism	ko00760	2	52	691	19416	BolC03g047150.2J;BolC04g012630.2J	K00858+K01240	Down
Circadian rhythm - plant	ko04712	17	227	691	19416	BolC01g057040.2J;BolC02g061010.2J;BolC04g001800.2J;BolC04g001840.2J;BolC04g002260.2J;BolC04g068220.2J;BolC05g000820.2J;BolC05g056870.2J;BolC06g014380.2J;BolC06g018270.2J;BolC06g035010.2J;BolC06g040910.2J;BolC07g023800.2J;BolC09g057350.2J;BolC09g068830.2J;Brassica_oleracea_newGene_2730;Brassica_oleracea_newGene_8794	K12135+K16222+K12134+K12128+K16240+K12128+K12133+K12133+K16240+K16222+K16222+K16222+K12126+K12135+K12129+K12135+K12135	Down
Mismatch repair	ko03430	3	513	691	19416	BolC02g026460.2J;BolC05g006910.2J;BolC09g045920.2J	K07466+K07466+K07466	Down
Fatty acid biosynthesis	ko00061	5	105	691	19416	BolC01g055910.2J;BolC01g055950.2J;BolC05g055170.2J;BolC06g029710.2J;BolC08g019870.2J	K00059+K00059+K00059+K01897+K10781	Down
Glycosphingolipid biosynthesis - globo and isoglobo series	ko00603	4	23	691	19416	BolC01g049890.2J;BolC02g003370.2J;BolC03g003960.2J;BolC06g017380.2J	K01988+K07407+K07407+K07407	Down
Protein export	ko03060	5	197	691	19416	BolC02g057050.2J;BolC05g042290.2J;BolC07g039440.2J;BolC08g044290.2J;Brassica_oleracea_newGene_297	K12948+K12275+K12948+K03110+K09481	Down
Glycosylphosphatidylinositol (GPI)-anchor biosynthesis	ko00563	2	70	691	19416	BolC05g021020.2J;BolC06g046960.2J	K03860+K03860	Down
Sulfur metabolism	ko00920	13	90	691	19416	BolC01g026690.2J;BolC03g014220.2J;BolC03g048340.2J;BolC03g054100.2J;BolC04g031550.2J;BolC04g041070.2J;BolC04g066600.2J;BolC05g053590.2J;BolC05g060700.2J;BolC05g062440.2J;BolC05g063700.2J;BolC08g012710.2J;BolC08g014200.2J	K01738+K00640+K13811+K00860+K13034+K17285+K01738+K00640+K01738+K01739+K05907+K17285+K01738	Down
Glutathione metabolism	ko00480	24	247	691	19416	BolC01g003060.2J;BolC02g022050.2J;BolC03g018970.2J;BolC03g028370.2J;BolC03g028600.2J;BolC03g031150.2J;BolC04g017810.2J;BolC04g020580.2J;BolC04g020720.2J;BolC04g060030.2J;BolC05g017330.2J;BolC05g062700.2J;BolC06g005860.2J;BolC06g029180.2J;BolC06g029190.2J;BolC07g039320.2J;BolC07g056220.2J;BolC07g057940.2J;BolC08g011970.2J;BolC08g027980.2J;BolC08g045980.2J;BolC08g046900.2J;BolC08g056050.2J;BolC09g0…	K00434+K00031+K00432+K00799+K00799+K00434+K00432+K00799+K00799+K01256+K21888+K00033+K00434+K00799+K00799+K21456+K00432+K00434+K00036+K21888+K01255+K00432+K00799+K00799	Down
Pyruvate metabolism	ko00620	5	298	691	19416	BolC01g004630.2J;BolC04g000790.2J;BolC04g064400.2J;BolC04g067630.2J;BolC09g036690.2J	K00128+K01679+K01595+K01759+K00162	Down
Glucosinolate biosynthesis	ko00966	2	137	691	19416	BolC05g007900.2J;BolC08g008400.2J	K00826+K01703	Down
Riboflavin metabolism	ko00740	5	53	691	19416	BolC03g060860.2J;BolC07g031930.2J;BolC08g025320.2J;BolC08g032500.2J;BolC09g021960.2J	K20884+K14379+K14379+K20884+K20884	Down
Glycine, serine and threonine metabolism	ko00260	18	209	691	19416	BolC01g001230.2J;BolC01g005590.2J;BolC01g052510.2J;BolC03g006860.2J;BolC03g025860.2J;BolC03g052810.2J;BolC03g052840.2J;BolC03g073550.2J;BolC05g021660.2J;BolC05g030770.2J;BolC05g037930.2J;BolC06g035950.2J;BolC06g042010.2J;BolC08g011080.2J;BolC08g026670.2J;BolC08g030530.2J;BolC08g038500.2J;BolC08g039970.2J	K00600+K00281+K01754+K00928+K00276+K00872+K00872+K00600+K14272+K02437+K02437+K15893+K14272+K02437+K00058+K14272+K01695+K00108	Down
Thiamine metabolism	ko00730	3	46	691	19416	BolC07g037130.2J;BolC08g012270.2J;BolC09g004230.2J	K00939+K00939+K00939	Down
Glycosphingolipid biosynthesis - lacto and neolacto series	ko00601	1	9	691	19416	BolC01g049890.2J	K01988	Down
Glycolysis / Gluconeogenesis	ko00010	17	342	691	19416	BolC01g004630.2J;BolC01g020340.2J;BolC01g050130.2J;BolC02g058910.2J;BolC03g033090.2J;BolC03g042070.2J;BolC03g072260.2J;BolC04g048770.2J;BolC04g051550.2J;BolC04g054650.2J;BolC05g053900.2J;BolC07g060370.2J;BolC08g007820.2J;BolC08g037830.2J;BolC08g037920.2J;BolC08g049270.2J;BolC09g036690.2J	K00128+K01792+K00927+K00001+K01792+K00927+K01623+K01623+K00131+K00927+K00927+K01623+K03841+K00002+K03841+K01623+K00162	Down
mRNA surveillance pathway	ko03015	3	349	691	19416	BolC03g050290.2J;BolC07g025150.2J;BolC07g033610.2J	K14400+K06269+K03456	Down
Tryptophan metabolism	ko00380	14	212	691	19416	BolC01g004630.2J;BolC01g040420.2J;BolC02g057540.2J;BolC02g057570.2J;BolC02g057910.2J;BolC02g058090.2J;BolC02g058100.2J;BolC03g064500.2J;BolC03g079080.2J;BolC05g011590.2J;BolC07g057990.2J;BolC09g011690.2J;BolC09g011700.2J;BolC09g051440.2J	K00128+K01237+K01237+K01237+K01237+K01237+K01237+K01501+K22588+K23947+K03781+K01237+K01237+K11817	Down
Cutin, suberine and wax biosynthesis	ko00073	5	164	691	19416	BolC04g015690.2J;BolC04g062550.2J;BolC04g062560.2J;BolC09g021670.2J;BolC09g050580.2J	K17991+K15404+K15404+K15405+K13356	Down
Valine, leucine and isoleucine degradation	ko00280	5	135	691	19416	BolC01g004630.2J;BolC03g031120.2J;BolC05g007100.2J;BolC05g007900.2J;BolC08g056630.2J	K00128+K00020+K05605+K00826+K05605	Down
RNA degradation	ko03018	2	645	691	19416	BolC03g064550.2J;BolC05g028170.2J	K12581+K12617	Down
Fatty acid elongation	ko00062	2	75	691	19416	BolC06g035640.2J;BolC08g050210.2J	K15397+K15397	Down
Carotenoid biosynthesis	ko00906	8	91	691	19416	BolC01g012860.2J;BolC01g020140.2J;BolC02g052670.2J;BolC03g071840.2J;BolC06g007260.2J;BolC09g015630.2J;BolC09g021680.2J;BolC09g025150.2J	K09840+K15746+K09841+K02293+K15748+K17911+K09835+K09843	Down
Fatty acid degradation	ko00071	3	107	691	19416	BolC01g004630.2J;BolC02g058910.2J;BolC06g029710.2J	K00128+K00001+K01897	Down
C5-Branched dibasic acid metabolism	ko00660	2	26	691	19416	BolC03g026160.2J;BolC08g008400.2J	K01704+K01703	Down
Arginine biosynthesis	ko00220	10	108	691	19416	BolC02g022220.2J;BolC03g000160.2J;BolC04g042400.2J;BolC05g021660.2J;BolC06g042010.2J;BolC07g059540.2J;BolC08g012040.2J;BolC08g030530.2J;BolC09g055090.2J;BolC09g064520.2J	K01915+K01915+K01915+K14272+K14272+K14682+K01915+K14272+K00261+K00261	Down
Phagosome	ko04145	20	257	691	19416	BolC01g017930.2J;BolC01g031400.2J;BolC01g057590.2J;BolC02g044480.2J;BolC02g057270.2J;BolC03g072240.2J;BolC04g056070.2J;BolC05g033120.2J;BolC06g004480.2J;BolC06g013090.2J;BolC06g024610.2J;BolC07g036160.2J;BolC07g042270.2J;BolC07g050860.2J;BolC08g049190.2J;BolC09g003780.2J;BolC09g016870.2J;BolC09g022050.2J;Brassica_oleracea_newGene_297;Brassica_oleracea_newGene_6082	K02152+K07375+K02152+K07375+K07374+K02155+K07375+K07374+K07374+K08492+K02149+K02146+K07375+K02152+K02154+K02146+K02150+K08057+K09481+K02155	Down
Biosynthesis of amino acids	ko01230	51	701	691	19416	BolC01g001230.2J;BolC01g026690.2J;BolC01g050130.2J;BolC01g052510.2J;BolC02g001040.2J;BolC02g011820.2J;BolC02g022050.2J;BolC02g022220.2J;BolC02g028100.2J;BolC03g000160.2J;BolC03g006860.2J;BolC03g014220.2J;BolC03g026160.2J;BolC03g038270.2J;BolC03g042070.2J;BolC03g052810.2J;BolC03g052840.2J;BolC03g055630.2J;BolC03g072260.2J;BolC03g073550.2J;BolC04g011760.2J;BolC04g025300.2J;BolC04g031550.2J;BolC04g0…	K00600+K01738+K00927+K01754+K00030+K05359+K00031+K01915+K01807+K01915+K00928+K00640+K01704+K13832+K00927+K00872+K00872+K01953+K01623+K00600+K00789+K00765+K13034+K12657+K01915+K01623+K00927+K01657+K01738+K00826+K01626+K14272+K00640+K00927+K01738+K01739+K13832+K01778+K14272+K14682+K01623+K01703+K01915+K01738+K00058+K14272+K01695+K01623+K05359+K00766+K00549	Down
alpha-Linolenic acid metabolism	ko00592	9	117	691	19416	BolC03g050590.2J;BolC04g056760.2J;BolC05g004830.2J;BolC05g028280.2J;BolC05g060390.2J;BolC06g001260.2J;BolC06g027420.2J;BolC08g028700.2J;BolC09g029020.2J	K05894+K16818+K16818+K16818+K10529+K16818+K00454+K10526+K10525	Down
Fructose and mannose metabolism	ko00051	11	179	691	19416	BolC03g023990.2J;BolC03g072260.2J;BolC04g048770.2J;BolC04g063870.2J;BolC07g016520.2J;BolC07g060370.2J;BolC08g007820.2J;BolC08g035480.2J;BolC08g037920.2J;BolC08g049270.2J;Brassica_oleracea_newGene_8627	K00966+K01623+K01623+K00966+K01805+K01623+K03841+K01711+K03841+K01623+K01809	Down
Plant-pathogen interaction	ko04626	41	1497	691	19416	BolC01g030440.2J;BolC02g013210.2J;BolC02g013240.2J;BolC02g019840.2J;BolC02g035460.2J;BolC02g035760.2J;BolC02g051560.2J;BolC02g061880.2J;BolC03g006140.2J;BolC03g017600.2J;BolC03g035090.2J;BolC03g045160.2J;BolC03g055710.2J;BolC03g063780.2J;BolC03g065400.2J;BolC04g031460.2J;BolC04g044950.2J;BolC04g063090.2J;BolC05g027270.2J;BolC06g006270.2J;BolC06g023430.2J;BolC06g028240.2J;BolC06g030270.2J;BolC06g0…	K18875+K16224+K16224+K13425+K16224+K18835+K09487+K13430+K02183+K18878+K05391+K05391+K13457+K02183+K20536+K16225+K02183+K13424+K13416+K16224+K13412+K18835+K13448+K16226+K15397+K13420+K13412+K02358+K13459+K02183+K13412+K13420+K13412+K15397+K13448+K13457+K16225+K13412+K16226+K13428+K13430	Down
Steroid biosynthesis	ko00100	1	88	691	19416	BolC02g034350.2J	K08242	Down
Pentose and glucuronate interconversions	ko00040	13	694	691	19416	BolC01g017270.2J;BolC01g017320.2J;BolC03g035710.2J;BolC03g044560.2J;BolC04g044520.2J;BolC04g066670.2J;BolC05g052170.2J;BolC05g059960.2J;BolC07g016520.2J;BolC08g024320.2J;BolC08g031230.2J;BolC08g037830.2J;BolC09g052650.2J	K01184+K01184+K16190+K12447+K00012+K01184+K01051+K01051+K01805+K16190+K01213+K00002+K01051	Down
Glycosaminoglycan degradation	ko00531	2	79	691	19416	BolC06g001090.2J;BolC07g058720.2J	K12309+K12309	Down
Base excision repair	ko03410	1	116	691	19416	BolC03g006700.2J	K10569	Down
Glycosphingolipid biosynthesis - ganglio series	ko00604	2	70	691	19416	BolC06g001090.2J;BolC07g058720.2J	K12309+K12309	Down
Biotin metabolism	ko00780	3	53	691	19416	BolC01g055910.2J;BolC01g055950.2J;BolC05g055170.2J	K00059+K00059+K00059	Down
Ribosome biogenesis in eukaryotes	ko03008	1	296	691	19416	BolC03g006550.2J	K03264	Down
Ascorbate and aldarate metabolism	ko00053	19	389	691	19416	BolC01g003060.2J;BolC01g004630.2J;BolC01g021740.2J;BolC01g049530.2J;BolC02g011090.2J;BolC02g011110.2J;BolC03g031150.2J;BolC03g035710.2J;BolC03g044560.2J;BolC03g053320.2J;BolC04g044520.2J;BolC05g017330.2J;BolC06g005860.2J;BolC07g038650.2J;BolC07g052660.2J;BolC07g057940.2J;BolC08g024320.2J;BolC08g027980.2J;Brassica_oleracea_newGene_5033	K00434+K00128+K14190+K00423+K00423+K00423+K00434+K16190+K12447+K00423+K00012+K21888+K00434+K10046+K00469+K00434+K16190+K21888+K00469	Down
Spliceosome	ko03040	10	672	691	19416	BolC01g004370.2J;BolC01g056820.2J;BolC02g000950.2J;BolC02g005890.2J;BolC02g062400.2J;BolC03g006610.2J;BolC03g008310.2J;BolC03g057890.2J;BolC09g059320.2J;Brassica_oleracea_newGene_711	K12900+K03283+K12827+K12818+K12833+K12818+K03283+K12867+K12818+K03283	Down
Pyrimidine metabolism	ko00240	4	169	691	19416	BolC04g012630.2J;BolC05g011710.2J;BolC07g040330.2J;Brassica_oleracea_newGene_1648	K01240+K01510+K13800+K00876	Down
Valine, leucine and isoleucine biosynthesis	ko00290	4	61	691	19416	BolC01g052510.2J;BolC03g026160.2J;BolC05g007900.2J;BolC08g008400.2J	K01754+K01704+K00826+K01703	Down
2-Oxocarboxylic acid metabolism	ko01210	10	293	691	19416	BolC02g001040.2J;BolC02g022050.2J;BolC03g006860.2J;BolC03g026160.2J;BolC05g007900.2J;BolC05g021660.2J;BolC06g042010.2J;BolC07g059540.2J;BolC08g008400.2J;BolC08g030530.2J	K00030+K00031+K00928+K01704+K00826+K14272+K14272+K14682+K01703+K14272	Down
Pentose phosphate pathway	ko00030	11	156	691	19416	BolC02g028100.2J;BolC03g072260.2J;BolC04g048770.2J;BolC04g051550.2J;BolC05g062700.2J;BolC07g041730.2J;BolC07g060370.2J;BolC08g007820.2J;BolC08g011970.2J;BolC08g037920.2J;BolC08g049270.2J	K01807+K01623+K01623+K00131+K00033+K01057+K01623+K03841+K00036+K03841+K01623	Down
Citrate cycle (TCA cycle)	ko00020	7	250	691	19416	BolC02g001040.2J;BolC02g022050.2J;BolC02g056270.2J;BolC02g056280.2J;BolC04g000790.2J;BolC09g036690.2J;Brassica_oleracea_newGene_3926	K00030+K00031+K01648+K01648+K01679+K00162+K00234	Down
Vitamin B6 metabolism	ko00750	2	27	691	19416	BolC04g062910.2J;BolC08g002460.2J	K06215+K05275	Down
Starch and sucrose metabolism	ko00500	27	629	691	19416	BolC01g011890.2J;BolC01g047050.2J;BolC01g057260.2J;BolC02g008270.2J;BolC02g009430.2J;BolC03g002080.2J;BolC03g003150.2J;BolC03g013050.2J;BolC04g034820.2J;BolC04g034850.2J;BolC04g042740.2J;BolC05g037540.2J;BolC05g054440.2J;BolC05g062390.2J;BolC06g017370.2J;BolC06g032260.2J;BolC06g042160.2J;BolC06g044870.2J;BolC06g048370.2J;BolC06g049480.2J;BolC07g010610.2J;BolC07g011370.2J;BolC07g011390.2J;BolC07g0…	K19892+K19891+K00703+K00695+K00975+K05349+K01188+K01188+K19892+K19891+K01188+K13679+K01188+K00703+K00695+K00695+K01179+K00695+K00688+K16055+K00975+K01188+K01188+K19892+K01177+K01193+K01193	Down
Stilbenoid, diarylheptanoid and gingerol biosynthesis	ko00945	1	72	691	19416	BolC04g056710.2J	K00487	Down
MAPK signaling pathway - plant	ko04016	37	1141	691	19416	BolC02g013210.2J;BolC02g013240.2J;BolC02g015510.2J;BolC02g019840.2J;BolC02g035460.2J;BolC02g049250.2J;BolC02g058900.2J;BolC03g002370.2J;BolC03g006140.2J;BolC03g041850.2J;BolC03g041890.2J;BolC03g063780.2J;BolC03g065400.2J;BolC03g082860.2J;BolC04g002090.2J;BolC04g044950.2J;BolC04g053020.2J;BolC04g063090.2J;BolC05g027270.2J;BolC05g037770.2J;BolC05g054200.2J;BolC05g059640.2J;BolC06g006270.2J;BolC06g0…	K16224+K16224+K13422+K13425+K16224+K20538+K20728+K14496+K02183+K20547+K20547+K02183+K20536+K20728+K13422+K02183+K14515+K13424+K13416+K13422+K20547+K20606+K16224+K13420+K13422+K13422+K20538+K02183+K13420+K20728+K03781+K13422+K13422+K13422+K20772+K17686+K20559	Down
Aminoacyl-tRNA biosynthesis	ko00970	3	388	691	19416	BolC03g050250.2J;BolC05g027380.2J;BolC08g016240.2J	K01868+K01880+K01893	Down
Purine metabolism	ko00230	11	315	691	19416	BolC01g024060.2J;BolC03g001300.2J;BolC03g044970.2J;BolC03g048340.2J;BolC03g054100.2J;BolC05g011710.2J;BolC06g051190.2J;BolC07g037130.2J;BolC08g012270.2J;BolC09g004230.2J;BolC09g068490.2J	K14977+K00856+K00951+K13811+K00860+K01510+K00759+K00939+K00939+K00939+K00856	Down
Peroxisome	ko04146	8	276	691	19416	BolC01g048330.2J;BolC02g022050.2J;BolC05g052050.2J;BolC06g029710.2J;BolC07g045980.2J;BolC07g057990.2J;BolC09g050580.2J;BolC09g055880.2J	K11517+K00031+K11517+K01897+K08726+K03781+K13356+K12261	Down
SNARE interactions in vesicular transport	ko04130	2	107	691	19416	BolC03g041180.2J;BolC06g013090.2J	K08486+K08492	Down
Cysteine and methionine metabolism	ko00270	25	354	691	19416	BolC01g017630.2J;BolC01g026690.2J;BolC01g056980.2J;BolC02g043900.2J;BolC03g006860.2J;BolC03g014220.2J;BolC03g036210.2J;BolC03g055700.2J;BolC03g078690.2J;BolC03g078700.2J;BolC04g011760.2J;BolC04g031550.2J;BolC04g066600.2J;BolC05g007900.2J;BolC05g053590.2J;BolC05g060700.2J;BolC05g062440.2J;BolC07g033800.2J;BolC07g039320.2J;BolC08g014200.2J;BolC08g026670.2J;BolC08g046080.2J;BolC09g018480.2J;BolC09g0…	K21623+K01738+K01611+K08967+K00928+K00640+K01611+K00558+K21623+K21623+K00789+K13034+K01738+K00826+K00640+K01738+K01739+K00547+K21456+K01738+K00058+K00547+K05933+K20772+K00549	Down
Tropane, piperidine and pyridine alkaloid biosynthesis	ko00960	7	116	691	19416	BolC03g025860.2J;BolC03g028630.2J;BolC03g028640.2J;BolC04g020890.2J;BolC04g020900.2J;BolC08g002850.2J;BolC08g002860.2J	K00276+K08081+K08081+K08081+K08081+K08081+K08081	Down
Lysine degradation	ko00310	2	103	691	19416	BolC01g004630.2J;BolC04g050970.2J	K00128+K11420	Down
Zeatin biosynthesis	ko00908	4	92	691	19416	BolC04g011870.2J;BolC04g061850.2J;BolC04g061860.2J;BolC09g058370.2J	K13496+K13496+K13496+K13496	Down
Arginine and proline metabolism	ko00330	8	204	691	19416	BolC01g004090.2J;BolC01g004630.2J;BolC01g056980.2J;BolC03g036210.2J;BolC03g072390.2J;BolC03g079450.2J;BolC04g036450.2J;BolC05g063800.2J	K01583+K00128+K01611+K01611+K14329+K01583+K12657+K00318	Down
RNA polymerase	ko03020	1	230	691	19416	BolCnng000950.2J	K03043	Down
Terpenoid backbone biosynthesis	ko00900	4	114	691	19416	BolC05g014620.2J;BolC05g043810.2J;BolC05g062970.2J;BolC09g047510.2J	K05356+K13789+K01823+K11778	Down
Endocytosis	ko04144	14	615	691	19416	BolC01g056820.2J;BolC02g027250.2J;BolC03g008310.2J;BolC03g067470.2J;BolC04g026130.2J;BolC04g030730.2J;BolC05g021870.2J;BolC06g041880.2J;BolC07g020080.2J;BolC09g019640.2J;BolC09g019760.2J;BolC09g029380.2J;Brassica_oleracea_newGene_711;Brassica_oleracea_newGene_933	K03283+K07937+K03283+K18467+K01528+K07937+K07937+K07937+K07937+K00889+K12489+K12486+K03283+K07901	Down
ABC transporters	ko02010	9	208	691	19416	BolC03g071630.2J;BolC04g061940.2J;BolC06g002670.2J;BolC06g034290.2J;BolC07g004900.2J;BolC07g033390.2J;BolC07g033410.2J;BolC08g017700.2J;BolC08g017750.2J	K05665+K05658+K05666+K05656+K05658+K05681+K05681+K05658+K05658	Down
Selenocompound metabolism	ko00450	3	65	691	19416	BolC03g048340.2J;BolC05g062440.2J;BolC09g055230.2J	K13811+K01739+K00549	Down
Carbon fixation in photosynthetic organisms	ko00710	28	278	691	19416	BolC01g050130.2J;BolC02g028100.2J;BolC02g043080.2J;BolC02g052580.2J;BolC03g042070.2J;BolC03g072260.2J;BolC04g036310.2J;BolC04g043920.2J;BolC04g047760.2J;BolC04g048770.2J;BolC04g054650.2J;BolC04g064400.2J;BolC05g021660.2J;BolC05g030190.2J;BolC05g038680.2J;BolC05g053900.2J;BolC06g017730.2J;BolC06g042010.2J;BolC07g034340.2J;BolC07g060370.2J;BolC08g007820.2J;BolC08g009480.2J;BolC08g011850.2J;BolC08g0…	K00927+K01807+K01601+K05298+K00927+K01623+K01100+K01602+K01602+K01623+K00927+K01595+K14272+K00855+K00855+K00927+K01602+K14272+K05298+K01623+K03841+K05298+K00855+K14272+K03841+K01100+K01623+K01601	Down
Photosynthesis	ko00195	46	247	691	19416	BolC01g006890.2J;BolC01g010440.2J;BolC01g010560.2J;BolC01g038980.2J;BolC01g046690.2J;BolC02g043070.2J;BolC02g043090.2J;BolC02g061950.2J;BolC02g063540.2J;BolC02g063560.2J;BolC03g084160.2J;BolC04g008510.2J;BolC04g019270.2J;BolC04g036730.2J;BolC04g056840.2J;BolC05g004730.2J;BolC05g008850.2J;BolC05g029450.2J;BolC05g048870.2J;BolC05g048890.2J;BolC05g048900.2J;BolC05g048960.2J;BolC06g006790.2J;BolC06g0…	K02109+K02693+K08903+K02112+K02695+K02112+K02704+K02701+K02641+K02641+K02695+K02717+K02721+K02717+K02721+K02717+K02639+K02694+K02689+K02705+K02705+K02703+K02695+K02723+K02638+K02641+K02716+K03542+K02699+K02639+K02641+K02638+K08901+K02717+K02636+K02716+K02641+K02111+K02705+K02705+K02689+K02112+K02634+K02704+K02704+K02638	Down
Isoflavonoid biosynthesis	ko00943	2	29	691	19416	BolC01g001710.2J;BolC07g036190.2J	K13260+K13260	Down
Phosphonate and phosphinate metabolism	ko00440	2	34	691	19416	BolC07g038840.2J;BolC08g053940.2J	K00967+K00993	Down
Pantothenate and CoA biosynthesis	ko00770	2	111	691	19416	BolC01g004630.2J;BolC05g007900.2J	K00128+K00826	Down
Propanoate metabolism	ko00640	2	126	691	19416	BolC05g007100.2J;BolC08g056630.2J	K05605+K05605	Down
Indole alkaloid biosynthesis	ko00901	2	30	691	19416	BolC04g035080.2J;BolC08g040930.2J	K01757+K01757	Down
Ether lipid metabolism	ko00565	2	78	691	19416	BolC02g062620.2J;BolC08g053940.2J	K06123+K00993	Down
Linoleic acid metabolism	ko00591	2	96	691	19416	BolC01g033690.2J;BolC06g027420.2J	K15718+K00454	Down
Isoquinoline alkaloid biosynthesis	ko00950	1	87	691	19416	BolC03g025860.2J	K00276	Down
Tyrosine metabolism	ko00350	2	116	691	19416	BolC02g058910.2J;BolC03g025860.2J	K00001+K00276	Down
Biosynthesis of various secondary metabolites - part 2	ko00998	1	2	691	19416	BolC05g038560.2J	K21568	Down
Other types of O-glycan biosynthesis	ko00514	1	33	691	19416	BolC08g025470.2J	K20784	Down
Sphingolipid metabolism	ko00600	9	179	691	19416	BolC01g028220.2J;BolC02g003370.2J;BolC03g003960.2J;BolC04g067910.2J;BolC05g030450.2J;BolC06g001090.2J;BolC06g017380.2J;BolC07g058720.2J;Brassica_oleracea_newGene_5219	K04708+K07407+K07407+K04718+K04708+K12309+K07407+K12309+K12349	Down
Ubiquinone and other terpenoid-quinone biosynthesis	ko00130	7	114	691	19416	BolC01g006290.2J;BolC03g031680.2J;BolC04g056710.2J;BolC05g041630.2J;BolC06g012960.2J;BolC06g027400.2J;BolC07g056590.2J	K09834+K14759+K00487+K01904+K01904+K12502+K09834	Down
Sesquiterpenoid and triterpenoid biosynthesis	ko00909	1	85	691	19416	BolC06g028970.2J	K15815	Down
Carbon metabolism	ko01200	63	784	691	19416	BolC01g001230.2J;BolC01g001500.2J;BolC01g005590.2J;BolC01g026690.2J;BolC01g048330.2J;BolC01g050130.2J;BolC01g052510.2J;BolC02g001040.2J;BolC02g022050.2J;BolC02g028100.2J;BolC02g043080.2J;BolC02g052580.2J;BolC03g014220.2J;BolC03g042070.2J;BolC03g072260.2J;BolC03g073550.2J;BolC04g000790.2J;BolC04g031550.2J;BolC04g036310.2J;BolC04g042720.2J;BolC04g043920.2J;BolC04g047760.2J;BolC04g048770.2J;BolC04g0…	K00600+K01455+K00281+K01738+K11517+K00927+K01754+K00030+K00031+K01807+K01601+K05298+K00640+K00927+K01623+K00600+K01679+K13034+K01100+K19269+K01602+K01602+K01623+K00131+K00927+K01595+K01738+K05605+K14272+K00855+K02437+K02437+K00855+K11517+K00640+K00927+K01738+K00033+K01602+K00297+K15893+K14272+K05298+K01057+K03781+K01623+K03841+K05298+K02437+K00855+K00036+K01738+K00058+K14272+K03841+K01100+K01623+…	Down
Phenylalanine, tyrosine and tryptophan biosynthesis	ko00400	8	140	691	19416	BolC02g011820.2J;BolC03g038270.2J;BolC04g061930.2J;BolC05g020720.2J;BolC05g063020.2J;BolC08g038500.2J;BolC09g050430.2J;BolC09g055200.2J	K05359+K13832+K01657+K01626+K13832+K01695+K05359+K00766	Down
Phosphatidylinositol signaling system	ko04070	11	257	691	19416	BolC03g006140.2J;BolC03g035180.2J;BolC03g063780.2J;BolC04g001810.2J;BolC04g036010.2J;BolC04g044950.2J;BolC06g001840.2J;BolC07g036430.2J;BolC07g046290.2J;BolC09g000720.2J;BolC09g019640.2J	K02183+K01092+K02183+K01092+K18081+K02183+K20279+K02183+K05857+K01092+K00889	Down
Phenylalanine metabolism	ko00360	5	135	691	19416	BolC03g025860.2J;BolC04g011300.2J;BolC04g062040.2J;BolC05g056320.2J;BolC08g037230.2J	K00276+K10775+K10775+K10775+K10775	Down
Phenylpropanoid biosynthesis	ko00940	32	734	691	19416	BolC01g015310.2J;BolC01g041020.2J;BolC02g018330.2J;BolC02g020550.2J;BolC02g033640.2J;BolC03g002080.2J;BolC03g003150.2J;BolC03g013050.2J;BolC03g015780.2J;BolC03g021880.2J;BolC04g011300.2J;BolC04g014160.2J;BolC04g042740.2J;BolC04g051280.2J;BolC04g056710.2J;BolC04g062040.2J;BolC05g007240.2J;BolC05g041090.2J;BolC05g041630.2J;BolC05g044940.2J;BolC05g054440.2J;BolC05g056320.2J;BolC05g062380.2J;BolC06g0…	K00430+K13068+K00430+K00430+K18368+K05349+K01188+K01188+K13066+K00430+K10775+K22395+K01188+K09753+K00487+K10775+K09753+K13068+K01904+K00083+K01188+K10775+K00430+K23260+K01904+K00430+K01188+K01188+K10775+K00430+K13066+K00430	Down
Other glycan degradation	ko00511	4	140	691	19416	BolC05g060400.2J;BolC06g001090.2J;BolC07g016740.2J;BolC07g058720.2J	K01206+K12309+K01206+K12309	Down
Nucleotide excision repair	ko03420	3	561	691	19416	BolC02g026460.2J;BolC05g006910.2J;BolC09g045920.2J	K07466+K07466+K07466	Down
Photosynthesis - antenna proteins	ko00196	18	45	691	19416	BolC02g017970.2J;BolC02g041240.2J;BolC03g020300.2J;BolC03g031810.2J;BolC03g050340.2J;BolC04g007730.2J;BolC04g014670.2J;BolC04g014680.2J;BolC04g025480.2J;BolC04g031280.2J;BolC07g015680.2J;BolC07g015690.2J;BolC07g035420.2J;BolC08g025750.2J;BolC08g027510.2J;BolC08g038840.2J;BolC09g003510.2J;BolCnng006120.2J	K08914+K08916+K08912+K08916+K08913+K08915+K08912+K08912+K08912+K08908+K08912+K08912+K08913+K08917+K08908+K08907+K08913+K08908	Down
Protein processing in endoplasmic reticulum	ko04141	17	701	691	19416	BolC01g056820.2J;BolC02g013130.2J;BolC02g017520.2J;BolC02g051560.2J;BolC03g005690.2J;BolC03g008310.2J;BolC03g012340.2J;BolC03g019950.2J;BolC03g029300.2J;BolC03g031730.2J;BolC04g016310.2J;BolC05g042290.2J;BolC06g027100.2J;BolC09g022050.2J;BolC09g048950.2J;Brassica_oleracea_newGene_297;Brassica_oleracea_newGene_711	K03283+K13993+K13993+K09487+K13993+K03283+K13993+K10088+K13993+K13993+K09584+K12275+K09517+K08057+K13993+K09481+K03283	Down
Monobactam biosynthesis	ko00261	2	35	691	19416	BolC03g006860.2J;BolC03g048340.2J	K00928+K13811	Down
Fatty acid metabolism	ko01212	5	155	691	19416	BolC01g055910.2J;BolC01g055950.2J;BolC05g055170.2J;BolC06g029710.2J;BolC08g019870.2J	K00059+K00059+K00059+K01897+K10781	Down
Monoterpenoid biosynthesis	ko00902	2	13	691	19416	BolC05g000220.2J;BolC08g047420.2J	K15095+K07385	Down
Glycerophospholipid metabolism	ko00564	8	322	691	19416	BolC02g062620.2J;BolC04g056760.2J;BolC05g004830.2J;BolC05g028280.2J;BolC05g062830.2J;BolC06g001260.2J;BolC07g038840.2J;BolC08g053940.2J	K06123+K16818+K16818+K16818+K18693+K16818+K00967+K00993	Down
Glyoxylate and dicarboxylate metabolism	ko00630	25	354	691	19416	BolC01g001230.2J;BolC01g001500.2J;BolC01g005590.2J;BolC01g048330.2J;BolC02g022220.2J;BolC02g043080.2J;BolC03g000160.2J;BolC03g073550.2J;BolC04g042400.2J;BolC04g042720.2J;BolC04g043920.2J;BolC04g047760.2J;BolC05g021660.2J;BolC05g030770.2J;BolC05g037930.2J;BolC05g052050.2J;BolC06g017730.2J;BolC06g035950.2J;BolC06g042010.2J;BolC07g057990.2J;BolC08g011080.2J;BolC08g012040.2J;BolC08g030530.2J;BolC09g0…	K00600+K01455+K00281+K11517+K01915+K01601+K01915+K00600+K01915+K19269+K01602+K01602+K14272+K02437+K02437+K11517+K01602+K15893+K14272+K03781+K02437+K01915+K14272+K00284+K01601	Down
Oxidative phosphorylation	ko00190	28	573	691	19416	BolC01g006890.2J;BolC01g008900.2J;BolC01g017930.2J;BolC01g023250.2J;BolC01g038980.2J;BolC01g057590.2J;BolC02g043070.2J;BolC03g031410.2J;BolC03g034290.2J;BolC03g055650.2J;BolC03g072240.2J;BolC04g000640.2J;BolC05g036510.2J;BolC05g054330.2J;BolC06g024610.2J;BolC07g036160.2J;BolC07g050860.2J;BolC08g025460.2J;BolC08g049190.2J;BolC09g003780.2J;BolC09g016870.2J;BolC09g027640.2J;BolC09g050530.2J;BolCnng0…	K02109+K01535+K02152+K02267+K02112+K02152+K02112+K03884+K03943+K01535+K02155+K03938+K03884+K03950+K02149+K02146+K02152+K00416+K02154+K02146+K02150+K03963+K03884+K02111+K02112+K00234+K02155+K05575	Down
Lysine biosynthesis	ko00300	2	54	691	19416	BolC03g006860.2J;BolC06g020890.2J	K00928+K01778	Down
Arachidonic acid metabolism	ko00590	5	77	691	19416	BolC03g018970.2J;BolC04g017810.2J;BolC07g045980.2J;BolC07g056220.2J;BolC08g046900.2J	K00432+K00432+K08726+K00432+K00432	Down
Galactose metabolism	ko00052	10	419	691	19416	BolC02g003370.2J;BolC03g003960.2J;BolC03g044560.2J;BolC06g001090.2J;BolC06g017380.2J;BolC07g058720.2J;BolC08g041480.2J;BolC08g047150.2J;BolC08g054840.2J;BolC09g018230.2J	K07407+K07407+K12447+K12309+K07407+K12309+K06617+K18819+K01193+K01193	Down
