# Supplementary material for: Hub Gene Identification and Heat-Stress-Related Transcriptional Regulation Mechanism in Cabbage (Brassica oleracea L.)
Source: MDPI journal article supplement (doi:10.3390/horticulturae9090977), 2023-08-30
Supplement: s1 [file s1 › Table S7.xlsx]

## Sheet: table 1
Table S7. Detailed statistics of key genes.
Gene ID	Gene Name	Description
BolC06g005890.2J	UPA20	BHLH transcription factor Upa20
BolC04g003520.2J	CPK	calcium-dependent protein kinase
BolC08g044690.2J	PTI6	pathogenesis-related genes transcriptional activator PTI6
BolC01g004240.2J	UPA20-L	BHLH transcription factor Upa20
BolC02g046020.2J	RPS2	disease resistance protein RPS2
BolC07g046110.2J	CTSF	cathepsin F
BolC06g005320.2J	DELLA	DELLA protein
BolC01g051360.2J	PP2C	protein phosphatase 2C
BolC07g057400.2J	ABF	ABA responsive element binding factor
BolC07g039220.2J	GID1	gibberellin receptor GID1
BolC03g066110.2J	ARR-B	two-component response regulator ARR-B family
BolC01g051280.2J	PP2C-L	protein phosphatase 2C
BolC05g024080.2J	BRI1	protein brassinosteroid insensitive 1
Brassica_oleracea_newGene_2928	ATPF1A	F-type H+/Na+-transporting ATPase subunit alpha
Brassica_oleracea_newGene_4238	ATPF1A-L	F-type H+/Na+-transporting ATPase subunit alpha
